# Supplementary material
Source: MDPI journal article supplement (https://www.mdpi.com/2297-8739/9/8/208)
Supplement: s1 [file s1]

## **Supplementary Materials**

### **Occurrence, distribution and health risk of short-chain chlorinated paraffins (SCCPs) in China: A critical review**

**Xufeng Zhang <sup>1,2,3</sup>, Ru Fan <sup>1</sup>, Yang Xu <sup>1</sup>, Yun-Ze Gao <sup>1</sup>, Aaron Bizimana <sup>4</sup>,  
Anastacia Rochelle Naidoo <sup>5</sup>, Bao-Cang Han <sup>1</sup>, Xiang-Zhou Meng <sup>1,3,4,\*</sup>**

<sup>1</sup> State Key Laboratory of Pollution Control and Resources Reuse, College of Environmental Science and Engineering, Tongji University, Shanghai 200092, China

<sup>2</sup> Modern Agriculture Branch, Jiaxing Vocational and Technical College, 547 Tongxiang Road, Jiaxing 314036, Zhejiang Province, China

<sup>3</sup> Jiaxing-Tongji Environmental Research Institute, 1994 Linggongtang Road, Jiaxing 314051, Zhejiang Province, China

<sup>4</sup> UNEP-Tongji Institute of Environment for Sustainable Development (IESD), College of Environmental Science and Engineering, Tongji University, Shanghai 200092, China

<sup>5</sup> English Language Centre, School of Languages, Xi'an Jiaotong-Liverpool University, 111 Ren'ai Road, Su-zhou Industrial Park, Suzhou, Jiangsu Province, 215123, China

\* Corresponding author email: [xzmeng@tongji.edu.cn](mailto:xzmeng@tongji.edu.cn) (X.-Z. Meng).

**Number of Table: 16; Number of Figure: 6**

Table S1. Concentrations of SCCPs in air samples in China.

Table S2. Concentrations of SCCPs in dust samples in China.

Table S3. Concentrations of SCCPs in water samples in China.

Table S4. Concentrations of SCCPs in soil samples in China.

Table S5. Concentrations of SCCPs in sediment samples in China.

Table S6. Concentrations of SCCPs in biota samples in China.

Table S7. Comparison of the concentrations (ng/m<sup>3</sup>) and compositional profiles (%) of SCCPs in air.

Table S8. Comparison of the concentrations (ng/L) and compositional profiles (%) of SCCPs in water.

Table S9. Comparison of the concentrations (ng/g dw) and compositional profiles (%) of SCCPs in soil.

Table S10. Comparison of the concentrations (ng/g dw) and compositional profiles (%) of SCCPs in sediment.

Table S11. Comparison of the concentrations (ng/g dw) and compositional profiles (%) of SCCPs in biota.

Table S12. Concentrations of SCCPs in food.

Table S13. Comparison of the concentrations (ng/g dw) and compositional profiles (%) of SCCPs in food.

Table S14. Concentrations of SCCPs in human tissue.

Table S15. Comparison of the concentrations (ng/g lw) and compositional profiles (%) of SCCPs in human tissue.

Table S16. Estimated daily intake (EDI) of SCCPs via various exposure routes.

Figure S1. Regional distribution (A) and domain proportion (B) of SCCP research in China over the past decade.

Figure S2. Concentrations of SCCPs (mean value) in environmental matrices in China.

Figure S3. GDP per capita (A), population density (B) and distribution of CP manufacturing plants (C) in China.

Figure S4. Carbon composition profiles of SCCP congeners in different environmental matrices in China. (A) The congener composition of SCCPs in air. (B) The congener composition of SCCPs in water. (C) The congener composition of SCCPs in soil. (D) The congener composition of SCCPs in sediment. (E) The congener composition of SCCPs in biota.

Figure S5. Chlorine composition profiles of SCCP congeners in different environmental matrices in China. (A) The chlorine abundance of SCCP congeners in air. (B) The chlorine abundance of SCCP congeners in water. (C) The chlorine abundance of SCCP congeners in soil. (D) The chlorine abundance of SCCP congeners in sediment. (E) The chlorine abundance of SCCP congeners in biota.

Figure S6. PCA of SCCP congeners in different regions of China. (A) PCA of SCCP congeners in air. (B) PCA of SCCP congeners in water. (C) PCA of SCCP congeners in soil. (D) PCA of SCCP congeners in sediment. (E) PCA of SCCP congeners in biota. NE: Northeastern China; N: Northern China; E: Eastern China; C: Central China; S:

Southern China; NW: Northwestern China; SW: Southwestern China; CS: China sea areas; BA: Background area.

Table S1. Concentrations of SCCPs in air samples in China.

| Region             | Location                         | Sampling time | Sample                                   | Matrice                             | Concentration (ng/m <sup>3</sup> )      | Reference |
|--------------------|----------------------------------|---------------|------------------------------------------|-------------------------------------|-----------------------------------------|-----------|
| China              | 18 Chinese cities <sup>a</sup>   | 2008          | Ambient air                              | Gas phase                           | 13.5–517                                | [1]       |
|                    | 10 Chinese cities <sup>b</sup>   | 2013–2014     | Ambient air                              | Particle phase (PM <sub>2.5</sub> ) | 1.98–274                                | [2]       |
| Northeastern China | Dalian                           | 2010 and 2016 | Ambient air                              | Gas and particle phases             | 15.1–66.4 (2010); 65.3–91.0 (2016)      | [3]       |
|                    | Dalian                           | 2016          | Ambient air                              | Gas and particle phases             | 16.2–168                                | [4]       |
|                    | Dalian                           | 2016–2017     | Ambient air                              | Gas phase                           | 4.04–78.0                               | [5]       |
| Northern China     | Beijing                          | 2011          | Ambient air                              | Gas and particle phases             | 1.90–332                                | [6]       |
|                    | Beijing                          | 2013–2014     | Indoor air                               | Gas phase                           | 60.0–1350                               | [7]       |
|                    | Beijing                          | 2016          | Indoor air                               | Gas phase                           | 9.77–966                                | [8]       |
|                    | Beijing                          | 2016          | Indoor and outdoor air                   | Particle phase (PM <sub>10</sub> )  | 38.3–87.7 (indoor); 16.9–28.8 (outdoor) | [9]       |
| Eastern China      | Jinan                            | 2016          | Ambient air                              | Particle phase (PM <sub>2.5</sub> ) | 9.80–105                                | [10]      |
|                    | Zibo                             | 2016          | Inside and outside a CP production plant | Gas and particle phases             | 129–1442 (inside); 89.0–333 (outside)   | [11]      |
| Southern China     | 3 cities in the YRD <sup>c</sup> | 2011–2012     | Ambient air                              | Gas phase                           | 6.08–63.2                               | [12]      |
|                    | Guangzhou                        | 2017          | Indoor air                               | Particle phase                      | 6.20–17.8                               | [13]      |
|                    | Shenzhen                         | 2013–2014     | Ambient air                              | Gas and particle phases             | 1.11–39.8                               | [14]      |
|                    | 3 cities in the PRD <sup>d</sup> | 2009–2010     | Ambient air                              | Gas phase                           | 0.95–106                                | [15]      |
|                    | 9 cities in the PRD <sup>e</sup> | 2017          | Indoor and outdoor air                   | Particle phase                      | 2.90–51.8 (indoor); 1.60–32.5 (outdoor) | [16]      |
| Southwestern China | Lhasa                            | 2012–2015     | Ambient air                              | Gas phase                           | 1.10–14.4                               | [17]      |
| China sea areas    | Bohai Sea                        | 2016          | Ambient air                              | Gas and particle phases             | 3.31–30.4                               | [18]      |
| Background area    | Shergyla Mountain                | 2012–2015     | Ambient air                              | Gas phase                           | 0.13–1.27                               | [17]      |

<sup>a</sup>Changchun, Shenyang, Beijing, Tianjin, Huade, Qingdao, Taiyuan, Xi'an, Wuhan, Shanghai, Hangzhou, Xiamen, Taizhong, Guangzhou, Hongkong, Nanning, Kunming and Jianfeng Mountain.

<sup>b</sup>Beijing, Chengdu, Lanzhou, Wuhan, Taiyuan, Guiyang, Xinxiang, Guangzhou, Nanjing and Shanghai.

<sup>c</sup>Suzhou, Wuxi and Nantong.

<sup>d</sup>Guangzhou, Dongguan and Huizhou.

<sup>e</sup>Guangzhou, Shenzhen, Dongguan, Foshan, Zhongshan, Zhuhai, Huizhou, Zhaoqing and Jiangmen.

PRD: Pearl River Delta.

YRD: Yangtze River Delta.

Table S2. Concentrations of SCCPs in dust samples in China.

| Region             | Location                                     | Sampling time | Sample                  | Concentration (µg/g dw)                    | Reference |
|--------------------|----------------------------------------------|---------------|-------------------------|--------------------------------------------|-----------|
| China              | China                                        | 2008–2014     | Indoor dust             | 106–808                                    | [19]      |
|                    | 4 major e-waste recycling sites <sup>a</sup> | 2013          | Indoor dust             | 1.80–240                                   | [20]      |
| Northeastern China | Harbin                                       | 2013          | Indoor dust             | 10.1–173                                   | [21]      |
|                    | Dalian                                       | 2015          | Indoor dust             | 16.0–361                                   | [22]      |
| Northern China     | Beijing                                      | 2015          | Indoor and outdoor dust | 254–12,585 (indoor); 13.0–49,118 (outdoor) | [23]      |
|                    | Beijing                                      | 2016          | Indoor dust             | 5.35–1022                                  | [8]       |
| Eastern China      | A CP production plant in Zibo                | 2016          | Indoor dust             | 440–16,688                                 | [11]      |
| Southern China     | A mega e-waste recycling industrial park in  | 2017          | Indoor dust             | 246–19,900                                 | [24]      |
|                    | Qingyuan                                     |               |                         |                                            |           |

<sup>a</sup>Taizhou, Guiyu, Dali and Qingyuan.

Table S3. Concentrations of SCCPs in water samples in China.

| Region             | Location                                         | Sampling time | Sample         | Concentration (ng/L)                       | Reference |
|--------------------|--------------------------------------------------|---------------|----------------|--------------------------------------------|-----------|
| Northeastern China | Liaodong Bay                                     | 2012          | Seawater       | 4.10–13.1                                  | [25]      |
|                    | Pulandian Bay                                    | 2012          | Seawater       | 494–1490                                   | [26]      |
| Northern China     | Beijing                                          | 2010          | Lake water     | 162–176                                    | [27]      |
|                    | Beijing                                          | 2016          | Drinking water | 20.0–26.0                                  | [8]       |
|                    | Sewage treatment plant                           | 2010          | Wastewater     | 364–4700                                   | [27]      |
|                    | Sewage treatment plant                           | 2012          | Wastewater     | 27.0–184                                   | [28]      |
|                    | Baiyangdian Lake <sup>a</sup>                    | 2016          | Lake water     | 1563–56,306                                | [29]      |
| Eastern China      | The intertidal zone of Shandong Peninsula        | 2017          | Seawater       | 370–548 (Yellow Sea); 573–1978 (Bohai Sea) | [30]      |
|                    | Shanghai                                         | 2016          | River water    | 15.0–1640                                  | [31]      |
| Central China      | The middle reaches of Yangtze River <sup>a</sup> | 2016          | River water    | 1131–65,640                                | [29]      |
| Southern China     | Pearl River Estuary                              | 2012–2013     | Seawater       | 180–460                                    | [32]      |
|                    | An enclosed freshwater pond <sup>b</sup>         | 2014          | Pond water     | 61.0 ± 5.50                                | [33]      |
| China sea areas    | Bohai Sea                                        | 2016          | Seawater       | 11.0–110                                   | [18]      |

<sup>a</sup>these concentrations were extremely high and would not be analyzed in this paper.

<sup>b</sup>near an e-waste recycling site in Qingyuan.

Table S4. Concentrations of SCCPs in soil samples in China.

| Region             | Location                                             | Sampling time | Sample                        | Concentration (ng/g dw)                                      | Reference |
|--------------------|------------------------------------------------------|---------------|-------------------------------|--------------------------------------------------------------|-----------|
| China              | 31 provinces of China                                | 2016          | Agricultural soil             | 38.7–1609                                                    | [34]      |
| Northeastern China | Liaohe River Basin                                   | 2010          | Agricultural soil             | 56.9–189                                                     | [35]      |
|                    | A CP production plant in Dalian                      | 2013–2014     | Ambient and industrial soil   | 1018–1824 (in plant); 24.8–482 (surrounding environment)     | [36]      |
| Northern China     | Beijing                                              | 2010          | Agricultural soil             | 160–1450                                                     | [37]      |
| Eastern China      | A CP production plant in Zibo                        | 2016          | Ambient and industrial soil   | 27,508–554,161 (in plant); 102–441 (surrounding environment) | [11]      |
|                    | The intertidal zone of the Shandong Peninsula        | 2017          | Ambient soil                  | 50.1–266                                                     | [30]      |
|                    | Yangkou chemical industrial park in Jiangsu province | 2018          | Ambient and industrial soil   | 37.5–996                                                     | [38]      |
|                    | Shanghai                                             | 2011          | Ambient soil (background)     | 0.42–420                                                     | [39]      |
|                    | Shanghai                                             | 2011          | Ambient soil (urban)          | ND–615                                                       | [40]      |
|                    | Shanghai                                             | 2011          | Ambient soil (suburban)       | ND–697                                                       | [41]      |
|                    | An e-waste dismantling area in Taizhou               | 2008 and 2010 | Agricultural soil             | 30.4–530                                                     | [42]      |
|                    | An e-waste dismantling area in Taizhou               | 2011          | Ambient soil                  | 226–755                                                      | [43]      |
|                    | An e-waste dismantling area in Taizhou               | 2008–2009     | Ambient soil                  | 48.0–1298                                                    | [44]      |
|                    | An e-waste dismantling area in Taizhou               | 2017          | Ambient and agricultural soil | 68.5–220,000                                                 | [45]      |
|                    | Guangzhou                                            | 2012          | Ambient and agricultural soil | 6.80–541                                                     | [46]      |
|                    | Guangzhou                                            | 2009–2010     | Ambient and agricultural soil | 1.45–25.5                                                    | [47]      |
|                    | Pearl River Delta                                    | 2009–2010     | Ambient soil                  | 1.90–236                                                     | [15]      |
|                    | A CP production plant brownfield site in Guangzhou   | 2018          | Industrial soil               | ND–5090                                                      | [48]      |
| Southwestern China | Chengdu                                              | 2014          | Ambient and agricultural soil | 0.22–3.26                                                    | [49]      |
|                    | Yunnan                                               | 2016          | Ambient soil                  | 79.0–948                                                     | [50]      |
| Background area    | Tibetan Plateau                                      | 2012–2014     | Ambient soil                  | 81.6 ± 31.1                                                  | [51]      |
|                    | Tibetan Plateau                                      | 2010–2016     | Ambient soil                  | 1.00–4.30 <sup>a</sup>                                       | [52]      |

<sup>a</sup>μg/g TOC.

Table S5. Concentrations of SCCPs in sediment samples in China.

| Region             | Location                                      | Sampling time | Sample                    | Concentration (ng/g dw)                                 | Reference |
|--------------------|-----------------------------------------------|---------------|---------------------------|---------------------------------------------------------|-----------|
| China              | China Coastal Estuaries                       | 2011          | Marine sediment           | 242–1450                                                | [26]      |
|                    | Nine lakes                                    | 2006–2019     | Lake sediment             | 28.0–400 (2006); 59.0–650 (2013–2019)                   | [53]      |
| Northeastern China | Liaohe River Basin                            | 2010          | River sediment            | 39.8–480                                                | [35]      |
|                    | Liaohe Estuary                                | 2009          | Marine sediment           | 64.9–407                                                | [54]      |
|                    | Liaohe Estuary                                | 2010          | Marine sediment           | 64.9–1683                                               | [55]      |
|                    | Liaodong Bay                                  | 2012          | Marine sediment           | 65.0–541                                                | [25]      |
|                    | Jinzhou Bay                                   | 2011          | Marine sediment           | ND–1680                                                 | [26]      |
|                    | Dalian Bay                                    | 2011          | Marine sediment           | 227–13,800                                              | [26]      |
|                    | Beijing                                       | 2010          | Lake sediment             | 1100–8700                                               | [27]      |
| Eastern China      | Laizhou Bay                                   | 2016          | River and marine sediment | 8.40–2000 (river sediment); 5.10–22.0 (marine sediment) | [56]      |
|                    | The intertidal zone of the Shandong Peninsula | 2017          | Marine sediment           | 17.6–453                                                | [30]      |
|                    | Shanghai                                      | 2016          | River sediment            | ND–2020                                                 | [31]      |
|                    | Qiantang River                                | 2011          | River sediment            | 46.0–670                                                | [43]      |
|                    | An e-waste dismantling area in Taizhou        | 2017          | River sediment            | 32.5–12,900                                             | [45]      |
| Central China      | The middle reaches of the Yellow River        | 2015          | River sediment            | 11.6–9760                                               | [57]      |
|                    | Henan section of the Yellow River             | 2014          | River sediment            | 11.8–2792                                               | [58]      |
|                    | The middle reaches of the Yangtze River       | 2015          | River sediment            | 4.19–41.6                                               | [59]      |
| Southern China     | Pearl River Delta                             | 2009–2010     | River sediment            | 320–6600                                                | [60]      |
|                    | Pearl River Delta                             | 2009–2010     | River sediment            | 224–3800                                                | [61]      |
|                    | PRD, Shenzhen and Hong Kong                   | 2012–2013     | Marine sediment           | ND–1540 <sup>b</sup>                                    | [62]      |
|                    | Pearl River Estuary                           | 2012–2013     | Marine sediment           | 180–620                                                 | [32]      |
|                    | Longtang, Qingyuan                            | 2010          | Pond sediment             | 3200–13,700                                             | [63]      |
|                    | An enclosed freshwater pond <sup>a</sup>      | 2014          | Pond sediment             | 82.0–350,000                                            | [33]      |
| China sea areas    | Bohai Sea                                     | 2010          | Marine sediment           | 97.4–1757                                               | [64]      |
|                    | Bohai and Yellow Seas                         | 2012          | Marine sediment           | 11.6–196                                                | [65]      |
|                    | East China Sea                                | 2011          | Marine sediment           | 9.00–37.2                                               | [66]      |
|                    | East China Sea                                | 2011          | Marine sediment           | 4.40–64.8                                               | [67]      |
|                    | East China Sea                                | 2012          | Marine sediment           | 9.38–41.6                                               | [68]      |

<sup>a</sup>near an e-waste recycling site in Qingyuan.<sup>b</sup>46.3–1540 (PRD); 14.7–574 (Shenzhen coastal zone); ND–75.9 (Hong Kong waters).



Table S6. Concentrations of SCCPs in biota samples in China.

| Region             | Location                                   | Sampling time | Sample                                  | Concentration (ng/g dw)                       | Reference |
|--------------------|--------------------------------------------|---------------|-----------------------------------------|-----------------------------------------------|-----------|
| Northeastern China | Liaohe Estuary                             | 2009          | Zooplankton, shellfish, shrimp and fish | 759–17,000                                    | [26]      |
|                    | Liaohe Estuary                             | 2010          | Mollusk                                 | 1550–11,900                                   | [55]      |
|                    | Liaodong Bay                               | 2009          | Zooplankton, benthonic animal and fish  | 660–20,320                                    | [69]      |
|                    | Liaodong Bay                               | 2012          | Organisms                               | 1600–17,000                                   | [25]      |
|                    | Liaodong Bay                               | 2014          | Fish                                    | 374–8430                                      | [70]      |
|                    | A CP production plant in Dalian            | 2013–2014     | Coniferous leave                        | 1281–2197 (in plant); 219–1742 (surrounding   | [36]      |
| Northern China     | Beijing                                    | 2011          | Pine needle and bark                    | 320–4270 (pine bark); 400–4010 (pine needle)  | [71]      |
|                    | Beijing                                    | 2010          | Fish                                    | 1000–3500                                     | [27]      |
| Eastern China      | Yangtze River Delta                        | 2011          | Snake                                   | 1900–19,000 (liver); 1900–22,000 (muscle);    | [72]      |
|                    | Yangtze River Delta                        | 2017          | Wildlife species                        | 69.0–360 (fish); 110–1400 (reptile); 710–3700 | [73]      |
|                    | Dianshan Lake, Shanghai                    | 2014          | Fish                                    | 810–30,000                                    | [74]      |
|                    | Shanghai                                   | 2015          | Pine needle                             | ND–13,600                                     | [75]      |
|                    | An e-waste dismantling area in Taizhou     | 2008 and 2010 | Snail                                   | 137–821                                       | [42]      |
| Southern China     | Dongjiang                                  | 2012          | Fish                                    | 53.0–614                                      | [76]      |
|                    | Pearl River Estuary                        | 2013          | Marine organisms                        | 61.0–930                                      | [77]      |
|                    | Pearl River Estuary                        | 2012–2013     | Marine biota                            | 74.0–2000                                     | [32]      |
|                    | Hong Kong water                            | 2012          | Marine organisms                        | 15.3–569 (fish); 11.1–72.2 (crustacean);      | [78]      |
|                    | An e-waste recycling site in Qingyuan      | 2011–2012     | Terrestrial bird species                | 620–17,000 <sup>a</sup>                       | [79]      |
|                    | An e-waste contaminated pond in Qingyuan   | 2016          | Aquatic organisms                       | 1200–250,000 <sup>a</sup>                     | [80]      |
|                    | An e-waste recycling site in Guiyu         | 2013          | Catfish and pigeon                      | 11,400–70,400 (catfish); 4700–11,000          | [81]      |
| China sea areas    | Bohai Sea                                  | 2009          | Mollusk                                 | 64.9–5510                                     | [82]      |
|                    | Bohai Sea                                  | 2010          | Bivalve                                 | 476–3270                                      | [64]      |
|                    | South China Sea (Hong Kong)                | 2004–2014     | Marine mammals                          | 280–3900 (porpoises); 430–9100 (dolphins)     | [83]      |
|                    | Yellow Sea (YS), East China Sea (ECS), and | 2008–2012     | Fish                                    | 13.5–60.0 (YS); 15.4–63.2 (ECS); 9.30–38.0    | [84]      |
| Background area    | Tibetan Plateau                            | 2007–2010     | Fish                                    | 3.90–107                                      | [85]      |
|                    | Tibetan Plateau                            | 2010–2016     | Bark, needle, lichen and moss           | 2900–7000 (bark); 2400–6400 (needle);         | [52]      |
|                    | Tibetan Plateau                            | 2012–2014     | Plant, plateau pika and eagle           | 173 ± 70.3 (plant); 258 ± 126 (plateau pika); | [51]      |

<sup>a</sup>lipid weight (lw).

Table S7. Comparison of the concentrations (ng/m<sup>3</sup>) and compositional profiles (%) of SCCPs in air.

| Region             | Location                                   | Range (mean/median)   | C <sub>10</sub> | C <sub>11</sub> | C <sub>12</sub> | C <sub>13</sub> | Cl <sub>5</sub> | Cl <sub>6</sub> | Cl <sub>7</sub> | Cl <sub>8</sub> | Cl <sub>9</sub> | Cl <sub>10</sub> | Reference |
|--------------------|--------------------------------------------|-----------------------|-----------------|-----------------|-----------------|-----------------|-----------------|-----------------|-----------------|-----------------|-----------------|------------------|-----------|
| China              | 18 Chinese cities, urban (G) <sup>a</sup>  | 16.0–517 (149/120)    | 42.20           | 37.20           | 12.70           | 7.88            | 30.60           | 42.40           | 22.30           | 3.95            | 0.70            | 0.03             | [1]       |
|                    | 18 Chinese cities, remote (G) <sup>a</sup> | 13.5–70.7 (43.7/-)    | 41.10           | 38.70           | 13.60           | 6.59            | 38.30           | 41.30           | 16.40           | 3.13            | 0.53            | 0.32             | [1]       |
| Northeastern China | Dalian (G, 2010)                           | 6.12–64.3 (26.9/17.8) | 51.08           | 26.82           | 12.48           | 9.62            | 14.14           | 56.74           | 19.15           | 8.20            | 1.40            | 0.36             | [3]       |
|                    | Dalian (P, 2010)                           | 0.52–10.5 (3.38/2.18) | 23.04           | 30.88           | 20.48           | 25.60           | 6.75            | 16.23           | 23.82           | 29.01           | 17.74           | 6.45             | [3]       |
|                    | Dalian (G, 2016)                           | 63.6–89.1 (76.3/-)    | 55.71           | 21.63           | 12.21           | 10.45           | 13.79           | 54.60           | 22.12           | 7.77            | 1.46            | 0.27             | [3]       |
|                    | Dalian (P, 2016)                           | 1.72–1.95 (1.84/-)    | 25.22           | 27.30           | 20.29           | 27.19           | 5.73            | 19.32           | 28.94           | 28.21           | 13.49           | 4.31             | [3]       |
|                    | Dalian (G, summer)                         | 21.1–78.0 (43.0/37.1) | 44.57           | 30.35           | 12.52           | 12.57           | 8.75            | 36.20           | 33.42           | 14.88           | 4.62            | 2.14             | [5]       |
|                    | Dalian (G, winter)                         | 4.04–10.0 (7.28/5.82) | 31.91           | 26.09           | 18.07           | 23.94           | 3.40            | 15.51           | 31.67           | 27.00           | 13.78           | 8.65             | [5]       |
|                    | Dalian (G, October 2016)                   | 14.9–165 (89.1/-)     | 53.13           | 21.07           | 13.39           | 12.41           | 15.70           | 54.82           | 20.35           | 7.13            | 1.61            | 0.38             | [4]       |
|                    | Dalian (G, November 2016)                  | 18.0–33.2 (25.2/-)    | 54.22           | 18.26           | 11.42           | 16.10           | 24.34           | 51.04           | 13.25           | 7.44            | 2.86            | 1.07             | [4]       |
|                    | Dalian (P, October 2016)                   | 1.30–2.57 (1.95/-)    | 26.31           | 27.14           | 19.30           | 27.24           | 6.81            | 19.00           | 26.97           | 27.50           | 14.53           | 5.19             | [4]       |
|                    | Dalian (P, November 2016)                  | 1.57–4.05 (2.68/-)    | 34.15           | 27.65           | 15.61           | 22.59           | 9.46            | 26.91           | 25.19           | 22.56           | 11.55           | 4.34             | [4]       |
| Northern China     | Beijing (G, summer)                        | 108–316 (189/-)       | 67.70           | 22.80           | 6.70            | 2.80            | 19.20           | 53.60           | 23.50           | 3.60            | 0.10            | 0.00             | [6]       |
|                    | Beijing (P, summer)                        | 4.10–25.0 (11.0/-)    | 22.70           | 30.00           | 23.20           | 24.10           | 49.50           | 13.90           | 25.00           | 9.50            | 2.10            | 0.10             | [6]       |
|                    | Beijing (G, winter)                        | 0.40–9.70 (2.40/-)    | 69.20           | 20.50           | 7.10            | 3.20            | 30.00           | 51.30           | 16.00           | 2.40            | 0.30            | 0.00             | [6]       |
|                    | Beijing (P, winter)                        | 1.40–23.0 (5.20/-)    | 36.40           | 35.00           | 17.50           | 11.10           | 11.80           | 37.30           | 35.10           | 13.90           | 1.95            | 0.00             | [6]       |
|                    | Beijing (G, indoor air)                    | 60.0–1350 (230/-)     | 69.30           | 24.10           | 4.50            | 2.10            | 18.60           | 50.50           | 25.50           | 5.20            | 0.20            | 0.00             | [7]       |
|                    | Beijing (G, indoor air)                    | 9.77–966 (181/71.9)   | 61.00           | 29.00           | 7.50            | 2.50            | 6.00            | 48.00           | 38.00           | 6.00            | 1.80            | 0.20             | [8]       |
|                    | Beijing (P, indoor air)                    | 38.3–87.7 (61.1/-)    | 49.01           | 25.53           | 6.74            | 8.65            | -               | -               | -               | -               | -               | -                | [9]       |
|                    | Beijing (P, outdoor air)                   | 16.9–28.8 (23.9/-)    | 45.90           | 27.96           | 6.96            | 6.01            | -               | -               | -               | -               | -               | -                | [9]       |
| Eastern China      | Beijing (P)                                | 6.17–48.1 (24.2/-)    | 18.90           | 43.20           | 20.40           | 17.50           | 3.16            | 18.60           | 32.80           | 23.30           | 15.40           | 6.72             | [2]       |
|                    | Suzhou, Wuxi and Nantong (G, summer)       | 6.08–63.2 (59.1/64.8) | 52.20           | 28.10           | 13.10           | 6.60            | 10.00           | 46.20           | 32.50           | 10.40           | 0.85            | 0.05             | [12]      |
|                    | Suzhou, Wuxi and Nantong (G, winter)       | 6.22–41.8 (19.1/15.8) | 60.10           | 18.70           | 9.70            | 11.50           | 12.70           | 46.00           | 29.30           | 10.60           | 1.10            | 0.30             | [12]      |
|                    | Shanghai (P)                               | 2.86–20.1 (8.00/-)    | 13.80           | 44.70           | 21.40           | 20.10           | 2.40            | 17.20           | 29.70           | 22.50           | 19.30           | 8.78             | [2]       |
|                    | Nanjing (P)                                | 2.36–19.0 (8.23/-)    | 14.60           | 43.40           | 21.50           | 20.50           | 2.35            | 16.60           | 30.90           | 23.00           | 18.90           | 8.22             | [2]       |
|                    | Jinan (P, spring)                          | 21.1–69.9 (37.7/37.7) | 34.40           | 23.30           | 19.80           | 22.50           | -               | -               | -               | -               | -               | -                | [10]      |
|                    | Jinan (P, summer)                          | 9.80–45.3 (29.7/29.7) | 29.40           | 24.40           | 21.40           | 24.90           | -               | -               | -               | -               | -               | -                | [10]      |
|                    | Jinan (P, autumn)                          | 10.1–46.4 (32.8/33.2) | 34.30           | 22.50           | 19.90           | 23.20           | -               | -               | -               | -               | -               | -                | [10]      |
|                    | Jinan (P, winter)                          | 27.0–105 (54.8/53.3)  | 39.80           | 21.40           | 17.60           | 21.20           | -               | -               | -               | -               | -               | -                | [10]      |

|                    |                                                                 |                       |       |       |       |       |       |       |       |       |       |      |      |
|--------------------|-----------------------------------------------------------------|-----------------------|-------|-------|-------|-------|-------|-------|-------|-------|-------|------|------|
|                    | Zibo (G, inside a CP production plant)                          | 97.7–988 (447/255)    | 63.00 | 14.60 | 9.80  | 12.50 | -     | -     | -     | -     | -     | -    | [11] |
|                    | Zibo (P, inside a CP production plant)                          | 31.7–454 (183/64.8)   | 40.40 | 29.20 | 16.60 | 13.70 | -     | -     | -     | -     | -     | -    | [11] |
|                    | Zibo (G, outside a CP production plant)                         | 81.7–316 (140/91.6)   | 60.70 | 18.60 | 9.90  | 10.90 | -     | -     | -     | -     | -     | -    | [11] |
|                    | Zibo (P, outside a CP production plant)                         | 7.40–16.5 (10.9/9.70) | 47.70 | 28.60 | 12.50 | 11.20 | -     | -     | -     | -     | -     | -    | [11] |
| Central China      | Wuhan (P)                                                       | 2.98–89.4 (25.8/-)    | 14.70 | 43.90 | 22.10 | 19.30 | 2.58  | 18.40 | 32.40 | 23.50 | 16.10 | 7.05 | [2]  |
|                    | Xinxiang (P)                                                    | 8.41–85.2 (42.8/-)    | 17.90 | 46.80 | 18.70 | 16.50 | 2.75  | 17.70 | 31.70 | 24.40 | 16.90 | 6.63 | [2]  |
|                    | Taiyuan (P)                                                     | 10.5–78.2 (28.8/-)    | 19.30 | 43.30 | 19.70 | 17.60 | 3.63  | 20.10 | 31.60 | 23.10 | 15.00 | 6.58 | [2]  |
| Southern China     | Guangzhou, Dongguan and Huizhou (G)                             | 0.95–106 (17.7/7.36)  | 34.00 | 34.00 | 20.00 | 12.00 | 8.44  | 40.10 | 35.60 | 11.40 | 2.90  | 1.61 | [15] |
|                    | 9 cities in the Pearl River Delta (P, indoor air) <sup>b</sup>  | 2.90–51.8 (12.9/12.6) | 17.31 | 32.52 | 24.13 | 26.05 | 13.30 | 24.10 | 34.30 | 19.60 | 6.60  | 2.00 | [16] |
|                    | 9 cities in the Pearl River Delta (P, outdoor air) <sup>b</sup> | 1.60–32.5 (6.10/5.75) | 14.37 | 27.77 | 26.02 | 31.84 | 11.30 | 21.30 | 32.60 | 21.50 | 9.40  | 3.90 | [16] |
|                    | Guangzhou (P)                                                   | 3.47–23.3 (12.7/-)    | 12.90 | 42.30 | 23.50 | 21.30 | 2.77  | 17.90 | 30.20 | 22.00 | 18.00 | 9.12 | [2]  |
|                    | Guangzhou (P, indoor air)                                       | 6.20–17.8 (13.8/13.8) | 31.00 | 31.00 | 18.00 | 20.00 | -     | -     | -     | -     | -     | -    | [13] |
|                    | Shenzhen (T)                                                    | 1.11–39.8 (5.06/-)    | -     | -     | -     | -     | -     | -     | -     | -     | -     | -    | [14] |
| Northwestern China | Lanzhou (P)                                                     | 4.36–27.5 (14.7/-)    | 19.20 | 49.40 | 17.30 | 14.10 | 2.80  | 18.20 | 32.20 | 23.80 | 16.20 | 6.81 | [2]  |
| Southwestern China | Lhasa (G)                                                       | 1.10–14.4 (5.53/5.53) | 59.80 | 25.56 | 9.03  | 5.61  | 9.34  | 58.80 | 28.16 | 3.28  | 0.40  | 0.02 | [17] |
|                    | Chengdu (P)                                                     | 3.82–25.8 (11.8/-)    | 16.30 | 50.80 | 16.50 | 16.50 | 2.77  | 18.10 | 30.00 | 22.70 | 18.70 | 7.73 | [2]  |
|                    | Guiyang (P)                                                     | 11.4–39.9 (23.6/-)    | 18.00 | 42.70 | 20.40 | 18.90 | 2.53  | 17.60 | 32.00 | 21.50 | 17.90 | 8.36 | [2]  |
| China sea areas    | Bohai Sea (G, May 2016)                                         | 2.80–11.0 (5.60/-)    | 62.95 | 21.58 | 7.91  | 7.55  | 5.85  | 43.86 | 30.70 | 14.62 | 4.97  | 0.00 | [18] |
|                    | Bohai Sea (P, May 2016)                                         | 0.51–3.60 (1.40/-)    | 18.06 | 23.61 | 20.83 | 37.50 | 0.00  | 9.78  | 31.55 | 37.85 | 18.30 | 2.52 | [18] |
|                    | Bohai Sea (G, August 2016)                                      | 7.60–29.0 (17.0/-)    | 59.17 | 25.44 | 8.88  | 6.51  | 7.08  | 38.75 | 32.08 | 16.25 | 5.42  | 0.42 | [18] |
|                    | Bohai Sea (P, August 2016)                                      | 0.31–1.40 (0.68/-)    | 29.41 | 26.47 | 16.18 | 27.94 | 0.00  | 14.84 | 35.16 | 37.50 | 12.50 | 0.00 | [18] |
| Background area    | Shergyla Mountain (G)                                           | 0.13–1.27 (0.46/0.44) | 66.07 | 22.32 | 7.18  | 4.43  | 12.00 | 38.85 | 36.10 | 12.20 | 0.80  | 0.05 | [17] |

<sup>a</sup>Changchun, Shenyang, Beijing, Tianjin, Huade, Qingdao, Taiyuan, Xi'an, Wuhan, Shanghai, Hangzhou, Xiamen, Taizhong, Guangzhou, Hongkong, Nanning, Kunming and Jianfeng Mountain.

<sup>b</sup>Guangzhou, Shenzhen, Dongguan, Foshan, Zhongshan, Zhuhai, Huizhou, Zhaoqing and Jiangmen.

G: gas phase.

P: particle phase.

T: gas and particle phases.

-: data not available.

Table S8. Comparison of the concentrations (ng/L) and compositional profiles (%) of SCCPs in water.

| Region             | Location                                  | Range (mean/median)            | C <sub>10</sub> | C <sub>11</sub> | C <sub>12</sub> | C <sub>13</sub> | Cl <sub>5</sub> | Cl <sub>6</sub> | Cl <sub>7</sub> | Cl <sub>8</sub> | Cl <sub>9</sub> | Cl <sub>10</sub> | Reference |
|--------------------|-------------------------------------------|--------------------------------|-----------------|-----------------|-----------------|-----------------|-----------------|-----------------|-----------------|-----------------|-----------------|------------------|-----------|
| Northeastern China | Liaodong Bay (Seawater)                   | 4.10–13.1 (7.70/-)             | 42.00           | 40.60           | 13.00           | 4.30            | 44.20           | 30.70           | 19.50           | 4.10            | 1.30            | 0.20             | [25]      |
|                    | Pulandian Bay (Seawater)                  | 494–1490 (953/834)             | 23.60           | 32.10           | 23.30           | 21.30           | 13.40           | 24.60           | 31.50           | 20.60           | 7.49            | 2.66             | [26]      |
| Northern China     | Beijing (STP <sup>a</sup> influent)       | 4200–4700 (4450/-)             | 21.70           | 32.20           | 27.50           | 18.60           | 2.00            | 12.00           | 35.90           | 32.10           | 13.50           | 4.50             | [27]      |
|                    | Beijing (STP <sup>a</sup> effluent)       | 364–416 (390/-)                | 16.20           | 34.70           | 35.10           | 14.00           | 8.50            | 23.70           | 29.60           | 24.40           | 9.55            | 4.30             | [27]      |
|                    | Beijing (Lake water)                      | 162–176 (169/-)                | 15.20           | 35.00           | 35.00           | 14.80           | 8.47            | 19.00           | 32.90           | 25.80           | 10.20           | 3.73             | [27]      |
|                    | Beijing (STP <sup>a</sup> raw)            | -(184/-)                       | 39.10           | 27.20           | 17.20           | 16.50           | 8.65            | 30.30           | 33.50           | 17.30           | 7.57            | 2.70             | [28]      |
|                    | Beijing (STP <sup>a</sup> primary)        | -(154/-)                       | 35.00           | 30.80           | 18.60           | 15.60           | 5.84            | 25.30           | 37.00           | 20.10           | 9.09            | 2.60             | [28]      |
|                    | Beijing (STP <sup>a</sup> anaerobic)      | -(52.0/-)                      | 44.80           | 30.20           | 14.60           | 10.40           | 9.38            | 35.40           | 37.50           | 13.50           | 3.13            | 1.04             | [28]      |
|                    | Beijing (STP <sup>a</sup> secondary)      | -(37.0/-)                      | 50.80           | 29.00           | 13.10           | 7.10            | 18.90           | 43.20           | 27.00           | 8.11            | 2.70            | 0.00             | [28]      |
|                    | Beijing (STP <sup>a</sup> tertiary)       | -(27.0/-)                      | 47.20           | 30.80           | 13.40           | 8.60            | 18.50           | 40.70           | 29.60           | 7.41            | 3.70            | 0.00             | [28]      |
|                    | Baiyangdian Lake (Lake water)             | 1563–56,306 (7223/3169)        | -               | -               | -               | -               | -               | -               | -               | -               | -               | -                | [29]      |
|                    | Shanghai (River water)                    | 15.0–1640 (448/278)            | 17.81           | 17.72           | 21.89           | 42.58           | 12.29           | 20.45           | 25.40           | 16.85           | 14.00           | 10.99            | [31]      |
| Eastern China      | Shandong Peninsula (Seawater, Bohai Sea)  | 573–1978 (1256/-)              | 28.31           | 27.06           | 19.50           | 25.13           | 9.68            | 22.20           | 27.11           | 26.24           | 8.89            | 5.87             | [30]      |
|                    | Shandong Peninsula (Seawater, Yellow Sea) | 370–548 (449/-)                | 33.33           | 23.76           | 18.73           | 24.17           | 7.51            | 19.72           | 26.85           | 26.96           | 12.19           | 6.78             | [30]      |
| Central China      | Yangtze River (River water)               | 1131–65,640<br>(18,989/14,691) | -               | -               | -               | -               | -               | -               | -               | -               | -               | -                | [29]      |
| Southern China     | Pearl River Estuary (Seawater)            | 180–460 (270/-)                | 41.70           | 26.20           | 18.30           | 13.80           | 21.50           | 31.10           | 28.80           | 11.90           | 4.70            | 2.00             | [32]      |
|                    | Qingyuan (Pond water)                     | -(61.0/-)                      | 26.70           | 28.90           | 22.30           | 22.10           | 6.60            | 13.80           | 38.20           | 24.10           | 12.70           | 4.60             | [33]      |
| China sea areas    | Bohai Sea (Seawater, G, May 2016)         | 7.10–21.0 (14.0/-)             | 20.83           | 52.78           | 15.28           | 11.11           | 3.45            | 14.22           | 42.12           | 29.54           | 9.85            | 0.82             | [18]      |
|                    | Bohai Sea (Seawater, P, May 2016)         | 3.90–19.0 (8.60/-)             | 32.56           | 29.07           | 19.77           | 18.60           | 4.25            | 14.93           | 39.55           | 29.10           | 11.19           | 0.97             | [18]      |
|                    | Bohai Sea (Seawater, G, August 2016)      | 18.0–81.0 (44.0/-)             | 56.69           | 24.94           | 6.80            | 11.56           | 9.65            | 33.27           | 46.57           | 8.98            | 1.41            | 0.12             | [18]      |
|                    | Bohai Sea (Seawater, P, August 2016)      | 9.40–29.0 (19.0/-)             | 27.37           | 28.42           | 21.58           | 22.63           | 6.40            | 25.26           | 46.25           | 18.14           | 3.56            | 0.39             | [18]      |

<sup>a</sup>sewage treatment plant.

-: data not available.

Table S9. Comparison of the concentrations (ng/g dw) and compositional profiles (%) of SCCPs in soil.

| Region             | Location                                                  | Range (mean/median)                 | C <sub>10</sub> | C <sub>11</sub> | C <sub>12</sub> | C <sub>13</sub> | Cl <sub>5</sub> | Cl <sub>6</sub> | Cl <sub>7</sub> | Cl <sub>8</sub> | Cl <sub>9</sub> | Cl <sub>10</sub> | Reference |
|--------------------|-----------------------------------------------------------|-------------------------------------|-----------------|-----------------|-----------------|-----------------|-----------------|-----------------|-----------------|-----------------|-----------------|------------------|-----------|
| China              | 31 provinces (Agricultural soil)                          | 38.7–1609 (374/256)                 | 30.60           | 28.40           | 21.10           | 19.90           | 27.20           | 18.10           | 21.20           | 13.90           | 11.60           | 7.90             | [34]      |
| Northeastern China | Liaoh River Basin (Paddy soil)                            | 56.9–171 (109/110)                  | 41.30           | 40.10           | 13.90           | 4.70            | 35.70           | 35.00           | 20.30           | 7.00            | 1.60            | 0.40             | [35]      |
|                    | Liaoh River Basin (Upland soil)                           | 83.5–189 (124/112)                  | 42.70           | 38.70           | 14.70           | 3.90            | 36.00           | 32.60           | 21.10           | 8.60            | 1.50            | 0.20             | [35]      |
|                    | Dalian (In-plant soil)                                    | 1018–1824 (1421/1421)               | 40.88           | 35.04           | 10.22           | 13.87           | 2.00            | 5.50            | 16.50           | 28.00           | 30.00           | 18.00            | [36]      |
| Northern China     | Dalian (Ambient soil)                                     | 24.8–482 (142/107)                  | 40.00           | 24.62           | 16.15           | 19.23           | 6.00            | 25.00           | 28.00           | 22.00           | 13.00           | 6.00             | [36]      |
|                    | Beijing (Farmland soil, wastewater irrigation)            | 305–1450 (702/588)                  | 37.90           | 24.90           | 19.00           | 18.30           | 20.40           | 34.70           | 23.70           | 12.30           | 5.83            | 3.00             | [37]      |
|                    | Beijing (Farmland soil, mixed irrigation)                 | 160–292 (229/233)                   | 56.00           | 23.40           | 12.60           | 8.13            | 26.10           | 45.90           | 19.00           | 6.63            | 1.83            | 0.55             | [37]      |
|                    | Beijing (Farmland soil, groundwater irrigation)           | -(200/-)                            | 58.00           | 25.50           | 10.50           | 6.00            | 20.50           | 50.70           | 20.70           | 5.80            | 2.30            | 0.00             | [37]      |
| Eastern China      | Chongming Island (Farmland soil)                          | 1.20–210 (24.9/4.20)                | 25.50           | 22.60           | 23.10           | 29.00           | 9.87            | 16.70           | 21.70           | 22.20           | 15.80           | 13.80            | [39]      |
|                    | Chongming Island (Woodland soil)                          | 0.42–14.0 (7.27/7.40)               | 14.20           | 34.20           | 16.00           | 36.40           | 10.60           | 17.20           | 21.40           | 21.30           | 15.40           | 14.10            | [39]      |
|                    | Chongming Island (Roadside soil)                          | 31.0–420 (202/160)                  | 19.40           | 25.90           | 19.40           | 35.30           | 8.87            | 17.00           | 21.80           | 21.50           | 17.60           | 13.30            | [39]      |
|                    | Shanghai (Background soil)                                | 0.42–420 (62.3/9.60)                | 22.80           | 24.60           | 21.50           | 31.20           | 9.73            | 16.80           | 21.70           | 21.90           | 16.10           | 13.70            | [39]      |
|                    | Shanghai (Urban soil)                                     | ND–615 (39.4/15.7)                  | 16.30           | 36.50           | 17.20           | 29.90           | 21.70           | 17.60           | 22.10           | 17.30           | 12.30           | 8.96             | [40]      |
|                    | Shanghai (Suburban soil)                                  | ND–697 (18.8/3.52)                  | 13.66           | 20.04           | 14.41           | 51.89           | 6.28            | 17.13           | 34.79           | 23.99           | 11.06           | 6.76             | [41]      |
|                    | Zibo (In-plant soil)                                      | 27,508–554,161<br>(306,740/322,645) | 16.40           | 21.50           | 29.80           | 32.30           | 0.80            | 5.70            | 16.80           | 25.60           | 19.80           | 31.30            | [11]      |
|                    | Zibo (Farmland and village soil)                          | 102–441 (248/241)                   | 26.60           | 23.70           | 23.30           | 26.30           | 13.30           | 20.00           | 24.00           | 22.70           | 9.40            | 10.60            | [11]      |
|                    | Shandong Peninsula (Coastal soil)                         | 50.1–266 (94.0/79.3)                | 29.30           | 22.70           | 21.20           | 26.80           | -               | -               | -               | -               | -               | -                | [30]      |
|                    | Jiangsu (Canal soil, chemical industrial park)            | 137–996 (456/234)                   | 28.80           | 17.40           | 19.50           | 34.30           | 5.50            | 25.50           | 38.50           | 22.00           | 7.00            | 1.50             | [38]      |
|                    | Jiangsu (STP <sup>a</sup> soil, chemical industrial park) | 210–706 (353/248)                   | 30.00           | 29.50           | 14.30           | 26.20           | 7.00            | 24.50           | 39.00           | 21.00           | 7.50            | 1.00             | [38]      |
|                    | Jiangsu (Road soil, chemical industrial park)             | 37.5–321 (133/104)                  | 37.60           | 21.50           | 15.20           | 25.70           | 6.50            | 28.00           | 38.50           | 21.00           | 5.50            | 0.50             | [38]      |
|                    | Taizhou (Ambient soil, e-waste dismantling area)          | 226–755 (423/332)                   | 34.00           | 22.00           | 26.00           | 18.00           | 1.00            | 8.00            | 16.00           | 27.00           | 25.00           | 23.00            | [43]      |
|                    | Taizhou (Ambient soil, e-waste dismantling area)          | 48.0–1298 (277/135)                 | 38.60           | 26.90           | 17.30           | 17.20           | 0.00            | 43.10           | 32.40           | 17.10           | 5.72            | 1.64             | [44]      |
|                    | Taizhou (Paddy soil, e-waste dismantling area)            | 30.4–530 (80.2/-)                   | 32.10           | 31.90           | 20.50           | 15.50           | 25.10           | 40.50           | 26.50           | 5.80            | 1.20            | 0.90             | [42]      |

|                    |                                                   |                               |       |       |       |       |       |       |       |       |       |       |      |
|--------------------|---------------------------------------------------|-------------------------------|-------|-------|-------|-------|-------|-------|-------|-------|-------|-------|------|
| Southern China     | Taizhou (Farmland soil, e-waste dismantling area) | 156–1160 (658/-)              | 19.90 | 27.00 | 25.00 | 28.10 | 3.50  | 13.00 | 26.00 | 30.00 | 16.00 | 11.50 | [45] |
|                    | Taizhou (Woodland soil, e-waste dismantling area) | 68.5 (-/-)                    | 33.30 | 24.30 | 18.00 | 24.40 | 6.00  | 24.00 | 30.00 | 22.00 | 10.00 | 8.00  | [45] |
|                    | Taizhou (Roadside soil, e-waste dismantling area) | 1900–220,000 (63,528/3975)    | 7.56  | 19.58 | 27.07 | 45.78 | 1.10  | 10.00 | 29.00 | 34.00 | 17.30 | 8.60  | [45] |
|                    | Guangzhou (Background soil)                       | -(7.00/-)                     | 26.00 | 28.90 | 22.20 | 13.70 | 9.85  | 22.90 | 22.10 | 18.40 | 12.30 | 14.70 | [86] |
|                    | Guangzhou (Paddy soil)                            | 20.0–206 (113/-)              | 28.40 | 30.20 | 19.80 | 21.50 | 17.30 | 27.20 | 25.90 | 14.00 | 8.70  | 6.90  | [86] |
|                    | Guangzhou (Vegetable soil)                        | 9.00–541 (104/16.0)           | 29.90 | 29.10 | 23.30 | 17.60 | 14.00 | 21.10 | 23.40 | 20.10 | 12.10 | 9.40  | [86] |
|                    | Guangzhou (Woodland soil)                         | 18.0–116 (59.3/51.0)          | 29.30 | 26.00 | 23.40 | 22.00 | 10.30 | 22.50 | 24.70 | 18.20 | 13.50 | 10.90 | [86] |
|                    | Guangzhou (Woodland soil)                         | 2.96–23.6 (10.4/-)            | 32.20 | 25.90 | 20.70 | 21.20 | 3.70  | 19.30 | 26.20 | 20.80 | 16.60 | 13.40 | [47] |
|                    | Guangzhou (Vegetable soil)                        | 1.45–372 (34.2/-)             | 31.70 | 35.00 | 21.50 | 21.70 | 5.30  | 18.90 | 28.70 | 20.70 | 15.80 | 10.60 | [47] |
|                    | Guangzhou (Paddy soil)                            | 2.97–23.1 (11.8/-)            | 33.20 | 25.10 | 20.20 | 21.50 | 4.50  | 21.40 | 29.70 | 20.30 | 15.30 | 7.80  | [47] |
| Southwestern China | Guangzhou (Brownfield site soil)                  | ND–5090 (1017/430)            | 21.30 | 21.10 | 21.50 | 36.10 | 0.30  | 13.20 | 29.00 | 27.50 | 17.70 | 12.30 | [48] |
|                    | Dongjiang River Basin (Urban and rural soil)      | 1.90–236 (18.3/-)             | 17.00 | 22.00 | 33.00 | 28.00 | 9.24  | 31.60 | 33.20 | 16.60 | 5.94  | 3.47  | [15] |
|                    | Chengdu (Background soil)                         | 0.62–0.85 (0.73/-)            | 30.40 | 24.70 | 19.50 | 25.30 | 3.40  | 21.90 | 32.60 | 23.10 | 13.80 | 5.25  | [49] |
|                    | Chengdu (Paddy soil)                              | 1.14–1.54 (1.30/-)            | 28.40 | 26.60 | 21.20 | 24.00 | 3.05  | 15.90 | 27.00 | 23.50 | 17.40 | 13.30 | [49] |
|                    | Chengdu (Vegetable soil)                          | 0.22–2.29 (1.16/-)            | 28.60 | 26.30 | 20.80 | 24.30 | 3.84  | 18.20 | 30.30 | 25.80 | 16.90 | 5.05  | [49] |
|                    | Chengdu (Woodland soil)                           | 0.32–1.74 (1.05/-)            | 31.10 | 26.00 | 19.20 | 23.90 | 4.45  | 20.80 | 30.20 | 26.30 | 13.80 | 4.45  | [49] |
|                    | Chengdu (Green belt soil)                         | 1.02–3.26 (2.02/-)            | 25.10 | 25.40 | 23.40 | 26.20 | 0.85  | 8.20  | 21.00 | 25.70 | 23.40 | 20.90 | [49] |
|                    | Chengdu (Soil core)                               | 0.42–2.29 (0.77/-)            | -     | -     | -     | -     | -     | -     | -     | -     | -     | -     | [49] |
|                    | Yunnan (Ambient soil)                             | 79.0–948 (348/317)            | 64.75 | 21.93 | 6.71  | 6.62  | 11.30 | 47.20 | 26.10 | 10.20 | 4.70  | 0.50  | [50] |
|                    | Nam Co Lake Basin (Grassland soil)                | -(81.6/-)                     | 59.80 | 26.00 | 8.50  | 5.70  | 15.90 | 33.00 | 28.20 | 17.30 | 4.40  | 1.20  | [51] |
| Background area    | Ngari                                             | 1.00–4.30 (2.70) <sup>b</sup> | 55.30 | 28.10 | 9.60  | 7.00  | 0.20  | 11.50 | 29.70 | 42.30 | 15.10 | 1.20  | [52] |
|                    | Nyingchi                                          | 1.10–2.60 (1.90) <sup>b</sup> | 58.80 | 25.70 | 7.40  | 7.10  | 0.40  | 12.00 | 30.30 | 41.40 | 15.80 | 2.10  | [52] |
|                    | Namco                                             | 2.10–4.30 (3.20) <sup>b</sup> | 52.30 | 27.20 | 11.50 | 9.00  | 0.30  | 7.40  | 28.20 | 44.40 | 18.20 | 1.50  | [52] |
|                    | Shergyla Mountain                                 | 1.30–3.60 (2.40) <sup>b</sup> | 39.20 | 21.60 | 22.50 | 16.70 | 2.50  | 22.20 | 39.70 | 28.60 | 6.40  | 0.60  | [52] |

<sup>a</sup>sewage treatment plant.

<sup>b</sup>µg/g TOC.

ND: not detected.

-: data not available.

Table S10. Comparison of the concentrations (ng/g dw) and compositional profiles (%) of SCCPs in sediment.

| Region             | Location                                              | Range (mean/median)       | C <sub>10</sub> | C <sub>11</sub> | C <sub>12</sub> | C <sub>13</sub> | Cl <sub>5</sub> | Cl <sub>6</sub> | Cl <sub>7</sub> | Cl <sub>8</sub> | Cl <sub>9</sub> | Cl <sub>10</sub> | Reference |
|--------------------|-------------------------------------------------------|---------------------------|-----------------|-----------------|-----------------|-----------------|-----------------|-----------------|-----------------|-----------------|-----------------|------------------|-----------|
| China              | China Coastal Estuaries (Marine sediment)             | 242–1450 (720/-)          | 31.90           | 26.90           | 19.60           | 21.60           | 26.80           | 21.70           | 20.50           | 16.30           | 10.70           | 4.00             | [26]      |
|                    | Nine Lakes (Lake sediment, 2006)                      | 28.0–400 (178/160)        | -               | -               | -               | -               | -               | -               | -               | -               | -               | -                | [53]      |
|                    | Seven Lakes (Lake sediment, 2013-2014)                | 59.0–360 (172/100)        | -               | -               | -               | -               | -               | -               | -               | -               | -               | -                | [53]      |
| Northeastern China | Liaohe River (River sediment)                         | 39.8–480 (216/193)        | 40.30           | 39.30           | 15.50           | 4.90            | 33.10           | 32.40           | 24.10           | 8.00            | 2.00            | 0.40             | [35]      |
|                    | Liaohe River (Marine sediment)                        | 64.9–407 (186/144)        | 35.20           | 35.40           | 22.70           | 6.70            | -               | -               | -               | -               | -               | -                | [54]      |
|                    | Liaodong Bay (Marine sediment)                        | 65.0–541 (299/-)          | 34.60           | 34.90           | 23.70           | 6.70            | 26.20           | 30.90           | 27.60           | 8.80            | 4.90            | 1.60             | [25]      |
|                    | Liaohe estuary (Marine sediment)                      | 64.9–1680 (420/345)       | 34.60           | 34.90           | 23.70           | 6.70            | 26.10           | 30.60           | 27.70           | 8.65            | 5.40            | 3.70             | [55]      |
|                    | Jinzhou Bay (Marine sediment)                         | ND–1680 (667/-)           | 33.20           | 27.90           | 22.90           | 16.00           | 31.30           | 25.00           | 17.70           | 15.80           | 8.68            | 1.50             | [26]      |
|                    | Dalian Bay (Marine sediment)                          | 227–13,800 (4040/-)       | 38.90           | 26.70           | 17.40           | 16.90           | 36.20           | 24.80           | 15.80           | 12.50           | 8.38            | 2.37             | [26]      |
|                    | Gaobeidian Lake (Surface sediment)                    | 1100–8700<br>(5769/7370)  | 20.90           | 29.50           | 26.80           | 22.70           | 3.25            | 16.10           | 36.80           | 26.90           | 12.80           | 4.18             | [27]      |
| Northern China     | Gaobeidian Lake (Upstream sediment core)              | 690–4670 (1700/1090)      | 27.50           | 23.50           | 22.50           | 26.50           | 5.96            | 16.00           | 28.70           | 23.00           | 17.30           | 9.06             | [27]      |
|                    | Gaobeidian Lake (Downstream sediment core)            | 730–9120 (4030/2250)      | 24.20           | 26.40           | 25.20           | 24.20           | 4.39            | 14.70           | 31.30           | 26.00           | 16.10           | 7.39             | [27]      |
|                    | Qiantang River (River sediment)                       | 46.0–670 (212/168)        | 17.00           | 27.00           | 29.00           | 27.00           | 5.30            | 14.70           | 30.00           | 32.00           | 13.00           | 5.00             | [43]      |
|                    | Shanghai (River sediment)                             | ND–2020 (308/89.3)        | 15.27           | 19.33           | 19.92           | 45.48           | 18.31           | 19.63           | 22.08           | 16.19           | 13.48           | 10.32            | [31]      |
|                    | Shandong Peninsula (Marine sediment, Bohai Sea)       | 69.5–453 (220/203)        | -               | -               | -               | -               | -               | -               | -               | -               | -               | -                | [30]      |
|                    | Shandong Peninsula (Marine sediment, Yellow Sea)      | 17.6–138 (60.8/52.3)      | -               | -               | -               | -               | -               | -               | -               | -               | -               | -                | [30]      |
|                    | Laizhou Bay (River sediment)                          | 8.40–2000 (160/30.0)      | -               | -               | -               | -               | -               | -               | -               | -               | -               | -                | [56]      |
|                    | Laizhou Bay (Marine sediment)                         | 5.10–22.0 (11.0/10.2)     | 33.20           | 31.30           | 18.90           | 17.50           | 8.50            | 34.00           | 34.90           | 16.00           | 4.20            | 2.40             | [56]      |
|                    | Taizhou (River sediment, e-waste dismantling area)    | 32.5–12,900<br>(3643/247) | 18.42           | 15.74           | 13.82           | 52.01           | 3.40            | 18.70           | 35.50           | 24.40           | 8.80            | 9.20             | [45]      |
| Central China      | Yellow River (River sediment)                         | 11.6–9760 (903/80.0)      | 77.44           | 13.97           | 4.86            | 3.74            | 3.84            | 42.86           | 40.48           | 10.36           | 1.89            | 0.56             | [57]      |
|                    | Yellow River (River sediment)                         | 11.8–2792 (262/71.5)      | 40.00           | 31.30           | 14.50           | 14.20           | 16.80           | 30.10           | 28.70           | 15.00           | 5.40            | 4.00             | [58]      |
|                    | Yangtze River (River sediment)                        | 4.19–41.6 (20.8/19.2)     | 74.66           | 15.80           | 4.76            | 4.77            | -               | -               | -               | -               | -               | -                | [59]      |
| Southern China     | Beijiang River (River sediment, low industrial areas) | 480–810 (610/-)           | 30.30           | 26.30           | 22.90           | 20.60           | 8.75            | 23.40           | 22.80           | 20.90           | 13.60           | 10.60            | [60]      |

|                                                                          |                    |       |       |       |       |      |       |       |       |       |       |      |
|--------------------------------------------------------------------------|--------------------|-------|-------|-------|-------|------|-------|-------|-------|-------|-------|------|
| Xijiang River (River sediment, low industrial areas)                     | 320–700 (530/-)    | 30.30 | 26.30 | 22.90 | 20.60 | 8.75 | 23.40 | 22.80 | 20.90 | 13.60 | 10.60 | [60] |
| Dongguan (River sediment, high industrial areas)                         | 530–4700 (1200/-)  | 23.20 | 26.70 | 25.30 | 24.90 | 4.64 | 7.80  | 12.60 | 20.20 | 22.00 | 32.80 | [60] |
| Guangzhou (River sediment, high industrial areas)                        | 580–2500 (1100/-)  | 23.20 | 26.70 | 25.30 | 24.90 | 4.64 | 7.80  | 12.60 | 20.20 | 22.00 | 32.80 | [60] |
| Shunde (River sediment, high industrial areas)                           | 510–3700 (1100/-)  | 23.20 | 26.70 | 25.30 | 24.90 | 4.64 | 7.80  | 12.60 | 20.20 | 22.00 | 32.80 | [60] |
| Dayan River (River sediment, e-waste dismantling area)                   | 600–1100 (830/-)   | 31.30 | 24.00 | 23.80 | 20.80 | 7.83 | 16.20 | 20.70 | 23.70 | 18.40 | 13.10 | [60] |
| Dayan River (River sediment, upper reaches)                              | 600–690 (645/-)    | 28.70 | 26.10 | 23.40 | 21.80 | 9.25 | 22.70 | 22.40 | 20.80 | 15.40 | 9.55  | [60] |
| Dayan River (River sediment, lower reaches)                              | 910–1100 (1000/-)  | 34.30 | 21.50 | 24.30 | 19.70 | 6.20 | 8.70  | 18.80 | 27.10 | 22.00 | 17.20 | [60] |
| Ponds (Pond sediment, e-waste dismantling area)                          | 320–6600 (2800/-)  | 35.20 | 19.80 | 24.20 | 20.80 | 3.95 | 7.55  | 13.80 | 27.70 | 22.90 | 24.10 | [60] |
| Pearl River Estuary (Marine sediment)                                    | 320–6600 (1700/-)  | 32.50 | 30.00 | 24.40 | 13.10 | 6.50 | 15.80 | 26.00 | 25.50 | 17.10 | 9.15  | [60] |
| Pearl River Estuary (Sediment core, upper segments)                      | 670–1100 (822/750) | 24.00 | 28.60 | 24.90 | 22.50 | -    | -     | -     | -     | -     | -     | [60] |
| Pearl River Estuary (Sediment core, deeper segments )                    | 290–680 (454/458)  | 19.60 | 26.20 | 28.00 | 26.20 | -    | -     | -     | -     | -     | -     | [60] |
| Dongguan section of the Dongjiang River (Sediment core)                  | 290–1200 (-/-)     | -     | -     | -     | -     | -    | -     | -     | -     | -     | -     | [61] |
| Dongguan section of the Dongjiang River (Sediment core, upper segments)  | -(770/-)           | 24.10 | 28.70 | 25.20 | 22.00 | -    | -     | -     | -     | -     | -     | [61] |
| Dongguan section of the Dongjiang River (Sediment core, deeper segments) | -(1500/-)          | 20.10 | 25.90 | 28.30 | 25.70 | -    | -     | -     | -     | -     | -     | [61] |
| Guangzhou section of the Pearl River (Sediment core)                     | 400–3800 (-/-)     | -     | -     | -     | -     | -    | -     | -     | -     | -     | -     | [61] |
| The middle section of the Beijiang River (Sediment core)                 | 270–730 (-/-)      | -     | -     | -     | -     | -    | -     | -     | -     | -     | -     | [61] |
| The middle section of the Beijiang River                                 | -                  | 25.20 | 29.70 | 24.00 | 21.10 | -    | -     | -     | -     | -     | -     | [61] |



|                                 |                                                            |                          |       |       |       |       |       |       |       |       |       |       |      |
|---------------------------------|------------------------------------------------------------|--------------------------|-------|-------|-------|-------|-------|-------|-------|-------|-------|-------|------|
| (Sediment core, upper segments) |                                                            |                          |       |       |       |       |       |       |       |       |       |       |      |
| China sea areas                 | The middle section of the Beijiang River                   | -                        | 22.10 | 25.00 | 27.10 | 25.80 | -     | -     | -     | -     | -     | -     | [61] |
|                                 | (Sediment core, deeper segments)                           |                          |       |       |       |       |       |       |       |       |       |       |      |
|                                 | Xijiang River Estuary (Sediment core)                      | 224–624 (-/-)            | -     | -     | -     | -     | -     | -     | -     | -     | -     | -     | [61] |
|                                 | Xijiang River Estuary (Sediment core, upper segments)      | -                        | 25.20 | 29.70 | 24.00 | 21.10 | -     | -     | -     | -     | -     | -     | [61] |
|                                 | Xijiang River Estuary (Sediment core, deeper segments)     | -                        | 22.10 | 25.00 | 27.10 | 25.80 | -     | -     | -     | -     | -     | -     | [61] |
|                                 | Pearl River Delta (River sediment)                         | 46.3–1540 (334/173)      | 20.70 | 19.10 | 21.30 | 38.90 | 6.90  | 10.30 | 20.80 | 28.20 | 20.00 | 13.80 | [62] |
|                                 | Shenzhen (Marine sediment)                                 | 14.7–574 (317/401)       | 25.20 | 22.00 | 21.90 | 30.80 | 10.60 | 12.50 | 21.10 | 27.20 | 17.90 | 10.70 | [62] |
|                                 | Hong Kong (Marine sediment)                                | ND–75.9 (22.0/12.2)      | 51.40 | 30.30 | 11.70 | 6.60  | 34.40 | 43.50 | 17.70 | 3.30  | 0.90  | 0.20  | [62] |
|                                 | Pearl River Estuary (Marine sediment)                      | 180–620 (500/-)          | 29.50 | 27.50 | 20.00 | 23.00 | 2.00  | 10.00 | 21.00 | 24.00 | 22.00 | 21.00 | [32] |
|                                 | Qingyuan (Pond sediment, e-waste dismantling area)         | 3200–13,700 (7200/-)     | 30.50 | 25.70 | 23.10 | 20.70 | 8.30  | 22.50 | 23.40 | 22.80 | 13.20 | 9.80  | [63] |
|                                 | Dayan River (River sediment, background site)              | 590–1230 (823/-)         | 32.80 | 27.00 | 24.20 | 16.00 | 9.50  | 20.00 | 22.30 | 23.30 | 14.50 | 10.40 | [63] |
|                                 | Qingyuan (Pond sediment, e-waste dismantling area)         | 82.0–350,000 (100,000/-) | 6.50  | 27.40 | 38.20 | 27.90 | 2.60  | 7.20  | 22.60 | 25.80 | 25.00 | 16.80 | [33] |
|                                 | Bohai Sea (Marine sediment)                                | 97.4–1757 (650/-)        | 37.40 | 31.90 | 20.10 | 10.50 | 20.00 | 35.20 | 27.30 | 10.50 | 5.26  | 1.62  | [64] |
|                                 | Bohai and Yellow Seas (Marine sediment)                    | 14.5–85.2 (38.4/33.0)    | 44.90 | 28.90 | 15.90 | 10.30 | 19.30 | 41.20 | 25.90 | 8.12  | 3.89  | 1.61  | [65] |
|                                 | Yellow Sea (Sediment core)                                 | 11.6–196 (43.8/23.4)     | 54.30 | 28.90 | 11.00 | 5.90  | 19.90 | 47.40 | 23.80 | 5.78  | 2.48  | 0.63  | [65] |
|                                 | East China Sea (Marine sediment)                           | 9.00–37.2 (24.0/24.7)    | 50.20 | 26.90 | 13.80 | 9.13  | 28.50 | 38.10 | 23.40 | 6.89  | 2.84  | 0.26  | [66] |
|                                 | East China Sea (Marine sediment)                           | 5.80–64.8 (25.9/23.2)    | 49.40 | 28.00 | 13.70 | 8.90  | -     | -     | -     | -     | -     | -     | [67] |
|                                 | East China Sea (Sediment core, central-shelf mud)          | 15.9–46.5 (27.5/24.1)    | 40.70 | 27.50 | 16.80 | 15.00 | -     | -     | -     | -     | -     | -     | [67] |
|                                 | East China Sea (Sediment core, inner-shelf mud)            | 4.40–25.7 (10.3/9.10)    | 53.90 | 22.30 | 12.40 | 11.40 | -     | -     | -     | -     | -     | -     | [67] |
|                                 | East China Sea (Marine sediment, Zhejiang-Fujian mud area) | 9.38–41.6 (22.9/21.5)    | 44.30 | 27.60 | 14.80 | 13.30 | 21.80 | 35.70 | 23.30 | 10.50 | 6.05  | 2.64  | [68] |

ND: not detected.

-: data not available.

Table S11. Comparison of the concentrations (ng/g dw) and compositional profiles (%) of SCCPs in biota.

| Region             | Location                               | Range (mean/median)     | C <sub>10</sub> | C <sub>11</sub> | C <sub>12</sub> | C <sub>13</sub> | Cl <sub>5</sub> | Cl <sub>6</sub> | Cl <sub>7</sub> | Cl <sub>8</sub> | Cl <sub>9</sub> | Cl <sub>10</sub> | Reference |
|--------------------|----------------------------------------|-------------------------|-----------------|-----------------|-----------------|-----------------|-----------------|-----------------|-----------------|-----------------|-----------------|------------------|-----------|
| Northeastern China | Liaohe Estuary (Mollusk)               | 1550–11,900 (6140/5880) | 36.50           | 40.40           | 16.10           | 6.95            | 31.60           | 25.10           | 27.00           | 12.10           | 3.80            | 3.70             | [55]      |
|                    | Liaohe Estuary (Zooplankton)           | -(5600/-)               | 42.40           | 40.10           | 10.90           | 6.70            | 49.40           | 25.70           | 20.20           | 3.80            | 0.90            | 0.00             | [26]      |
|                    | Liaohe Estuary (Shellfish)             | 1550–11,900 (6140/5880) | 34.50           | 36.50           | 18.70           | 10.30           | 36.90           | 26.60           | 22.30           | 10.30           | 3.00            | 0.90             | [26]      |
|                    | Liaohe Estuary (Shrimp/crab)           | 4040–8000 (6020/-)      | 37.20           | 37.60           | 16.20           | 9.00            | 48.80           | 23.40           | 17.30           | 7.20            | 2.40            | 0.87             | [26]      |
|                    | Liaohe Estuary (Fish)                  | 759–17,000 (7040/-)     | 35.60           | 41.60           | 14.70           | 8.10            | 44.00           | 29.40           | 16.20           | 6.60            | 2.60            | 1.08             | [26]      |
|                    | Liaodong Bay (Organism)                | 660–20,320 (6350/5090)  | 37.50           | 44.90           | 13.30           | 4.33            | –               | –               | –               | –               | –               | –                | [69]      |
|                    | Liaodong Bay (Organism)                | 1600–17,000 (6680/-)    | 37.40           | 44.90           | 12.50           | 5.20            | 45.90           | 25.20           | 19.50           | 6.96            | 2.15            | 0.30             | [25]      |
|                    | Liaodong Bay (Zooplankton)             | -(5600/-)               | 47.30           | 42.70           | 7.60            | 2.40            | 53.90           | 21.90           | 20.30           | 2.70            | 1.20            | 0.00             | [25]      |
|                    | Liaodong Bay (Invertebrates)           | 1600–11,900 (5960/-)    | 42.10           | 39.40           | 13.10           | 5.43            | 44.10           | 23.30           | 21.00           | 8.39            | 2.76            | 0.43             | [25]      |
|                    | Liaodong Bay (Fish)                    | 4300–17,000 (7450/-)    | 34.00           | 46.40           | 14.40           | 5.23            | 47.40           | 27.20           | 17.90           | 5.70            | 1.59            | 0.18             | [25]      |
|                    | Liaodong Bay (Bastard halibut)         | -(8430/-)               | 42.08           | 30.51           | 14.11           | 13.30           | -               | -               | -               | -               | -               | -                | [70]      |
|                    | Liaodong Bay (Turbot)                  | -(3998/-)               | 32.43           | 23.32           | 15.46           | 28.78           | -               | -               | -               | -               | -               | -                | [70]      |
|                    | Liaodong Bay (Ray)                     | -(2215/-)               | 65.85           | 22.03           | 8.16            | 3.95            | -               | -               | -               | -               | -               | -                | [70]      |
|                    | Liaodong Bay (Navodon septentrionalis) | -(1741/-)               | 28.70           | 21.95           | 23.70           | 25.65           | -               | -               | -               | -               | -               | -                | [70]      |
|                    | Liaodong Bay (Yellow croaker)          | -(1287/-)               | 87.98           | 8.73            | 1.54            | 1.75            | -               | -               | -               | -               | -               | -                | [70]      |
|                    | Liaodong Bay (Bass)                    | -(946/-)                | 81.54           | 13.49           | 2.85            | 2.12            | -               | -               | -               | -               | -               | -                | [70]      |
|                    | Liaodong Bay (Capelin)                 | -(784/-)                | 30.78           | 24.57           | 26.45           | 18.21           | -               | -               | -               | -               | -               | -                | [70]      |
|                    | Liaodong Bay (Spanish mackerel)        | -(632/-)                | 71.19           | 18.29           | 4.73            | 5.80            | -               | -               | -               | -               | -               | -                | [70]      |
|                    | Liaodong Bay (Abalone)                 | -(437/-)                | 37.07           | 24.98           | 21.97           | 15.98           | -               | -               | -               | -               | -               | -                | [70]      |
|                    | Liaodong Bay (Cod)                     | -(374/-)                | 78.21           | 14.78           | 3.43            | 3.57            | -               | -               | -               | -               | -               | -                | [70]      |
| Northern China     | Dalian (Coniferous leaves, in-plant)   | 1281–2197 (1739/1739)   | 40.30           | 28.36           | 13.43           | 17.91           | 4.00            | 15.00           | 23.00           | 26.00           | 21.00           | 11.00            | [36]      |
|                    | Dalian (Coniferous leaves, ambient)    | 219–1742 (701/627)      | 50.79           | 12.70           | 19.05           | 17.46           | 15.00           | 35.00           | 23.00           | 15.00           | 8.00            | 4.00             | [36]      |
|                    | Gaobeidian Lake (Spirogyra)            | -(4700/-)               | 27.00           | 23.20           | 22.00           | 27.80           | 3.88            | 10.70           | 25.10           | 21.80           | 22.70           | 15.90            | [27]      |
|                    | Gaobeidian Lake (Coccid)               | -(3600/-)               | 23.30           | 26.10           | 25.40           | 25.20           | 5.40            | 12.60           | 29.20           | 22.40           | 18.40           | 12.10            | [27]      |
|                    | Gaobeidian Lake (Fish)                 | 1000–3500 (1940/-)      | 17.10           | 33.00           | 33.40           | 16.50           | 6.64            | 14.90           | 34.80           | 27.30           | 12.40           | 3.98             | [27]      |
|                    | Beijing (Pine bark, winter)            | 320–4270 (980/-)        | 23.00           | 25.00           | 25.00           | 27.00           | 6.50            | 28.40           | 37.10           | 22.40           | 4.70            | 0.90             | [71]      |
|                    | Beijing (Pine bark, summer)            | 320–4270 (980/-)        | 39.00           | 30.00           | 17.00           | 14.00           | 8.40            | 36.70           | 34.60           | 17.10           | 2.60            | 0.60             | [71]      |
|                    | Beijing (Pine needle, winter)          | 400–4010 (1090/-)       | 29.00           | 27.00           | 22.00           | 22.00           | 5.10            | 23.50           | 38.90           | 25.20           | 6.40            | 0.90             | [71]      |
|                    | Beijing (Pine needle, summer)          | 400–4010 (1090/-)       | 41.00           | 30.00           | 16.00           | 13.00           | 7.70            | 42.20           | 32.80           | 14.80           | 2.00            | 0.50             | [71]      |

|               |                                                     |                                     |       |       |       |       |       |       |       |       |       |      |      |
|---------------|-----------------------------------------------------|-------------------------------------|-------|-------|-------|-------|-------|-------|-------|-------|-------|------|------|
| Eastern China | Shanghai (Pine needle)                              | ND–13,600 (63.7/75.2)               | 25.08 | 24.60 | 21.22 | 29.10 | 7.21  | 24.95 | 29.16 | 18.31 | 11.92 | 8.46 | [75] |
|               | Yangtze River Delta (Red-backed rat snake, liver)   | 3800–19,000 (9000/-) <sup>a</sup>   | -     | -     | -     | -     | -     | -     | -     | -     | -     | -    | [72] |
|               | Yangtze River Delta (Red-backed rat snake, muscle)  | 1900–7700 (4400/-) <sup>a</sup>     | -     | -     | -     | -     | -     | -     | -     | -     | -     | -    | [72] |
|               | Yangtze River Delta (Red-backed rat snake, adipose) | ND–155 (52/-) <sup>a</sup>          | -     | -     | -     | -     | -     | -     | -     | -     | -     | -    | [72] |
|               | Yangtze River Delta (Short-tailed mamushi, liver)   | 1900–13,000 (5200/-) <sup>a</sup>   | -     | -     | -     | -     | -     | -     | -     | -     | -     | -    | [72] |
|               | Yangtze River Delta (Short-tailed mamushi, muscle)  | 8900–22,000 (16,000/-) <sup>a</sup> | -     | -     | -     | -     | -     | -     | -     | -     | -     | -    | [72] |
|               | Yangtze River Delta (Short-tailed mamushi, adipose) | ND–160 (73.0/-) <sup>a</sup>        | -     | -     | -     | -     | -     | -     | -     | -     | -     | -    | [72] |
|               | Yangtze River Delta (Pond loach, fish)              | 140–360 (-/250)                     | -     | -     | -     | -     | -     | -     | -     | -     | -     | -    | [73] |
|               | Yangtze River Delta (Rice field eel, fish)          | 69.0–160 (-/86.0)                   | -     | -     | -     | -     | -     | -     | -     | -     | -     | -    | [73] |
|               | Yangtze River Delta (Red-backed rat, Reptile)       | 110–270 (-/140)                     | -     | -     | -     | -     | -     | -     | -     | -     | -     | -    | [73] |
|               | Yangtze River Delta (Red-banded snake, Reptile)     | -(-/280)                            | -     | -     | -     | -     | -     | -     | -     | -     | -     | -    | [73] |
|               | Yangtze River Delta (Short-tailed mamushi, Reptile) | 580–1400 (-/1100)                   | -     | -     | -     | -     | -     | -     | -     | -     | -     | -    | [73] |
|               | Yangtze River Delta (Yellow weasel, Mammal)         | 710–3700 (-/1000)                   | -     | -     | -     | -     | -     | -     | -     | -     | -     | -    | [73] |
|               | Yangtze River Delta (Peregrine falcon, Bird)        | 120–2300 (-/170)                    | -     | -     | -     | -     | -     | -     | -     | -     | -     | -    | [73] |
|               | Yangtze River Delta (Collared scops owl, Bird)      | <44.0–110 (-/60)                    | -     | -     | -     | -     | -     | -     | -     | -     | -     | -    | [73] |
|               | Yangtze River Delta (Common cuckoo, Bird)           | <28.0–160 (-/35)                    | -     | -     | -     | -     | -     | -     | -     | -     | -     | -    | [73] |
|               | Dianshan Lake (Grass carp)                          | 2900–7400 (4600/-)                  | 59.00 | 28.00 | 9.00  | 4.00  | 22.00 | 42.00 | 26.00 | 8.00  | 2.00  | 0.00 | [74] |
|               | Dianshan Lake (Bighead carp)                        | 1200–7200 (3300/-)                  | 34.00 | 30.00 | 17.00 | 19.00 | 9.00  | 28.00 | 35.00 | 22.00 | 5.00  | 1.00 | [74] |
|               | Dianshan Lake (Silver carp)                         | 1100–1600 (1300/-)                  | 44.00 | 28.00 | 19.00 | 9.00  | 9.50  | 31.50 | 36.50 | 18.50 | 4.00  | 0.00 | [74] |
|               | Dianshan Lake (Crucian carp)                        | 2600–21,000 (8900/-)                | 50.00 | 26.00 | 13.00 | 11.00 | 15.00 | 40.00 | 30.00 | 11.00 | 3.50  | 0.50 | [74] |
|               | Dianshan Lake (Common carp)                         | 1100–30,000 (7600/-)                | 43.00 | 31.00 | 14.00 | 22.00 | 14.00 | 38.00 | 32.00 | 13.00 | 2.90  | 0.10 | [74] |
|               | Dianshan Lake (Snakehead)                           | 810–5400 (2100/-)                   | 41.00 | 27.00 | 16.00 | 16.00 | 20.00 | 39.00 | 25.00 | 11.00 | 4.50  | 0.50 | [74] |
|               | Dianshan Lake (Predatory carp)                      | 2400–11,000 (4500/-)                | 44.00 | 31.00 | 13.00 | 22.00 | 14.00 | 34.00 | 32.00 | 15.00 | 4.60  | 0.40 | [74] |
|               | Dianshan Lake (Yellow catfish)                      | 2800–10,000 (6000/-)                | 48.00 | 26.00 | 13.00 | 11.00 | 14.00 | 36.00 | 32.00 | 14.00 | 3.70  | 0.30 | [74] |
|               | Dianshan Lake (Rosy bitterling)                     | 2000–7600 (3500/-)                  | 29.00 | 25.00 | 20.00 | 26.00 | 9.00  | 21.00 | 29.00 | 25.00 | 13.00 | 3.00 | [74] |
|               | Dianshan Lake (Stone moroko)                        | 1300–2300 (1800/-)                  | 39.00 | 27.00 | 15.00 | 19.00 | 12.00 | 29.00 | 31.00 | 20.00 | 6.50  | 1.50 | [74] |
|               | Dianshan Lake (Bigmouth grenadier anchovy)          | 2600–4800 (3900/-)                  | 46.00 | 27.00 | 13.00 | 14.00 | 9.00  | 31.00 | 35.00 | 19.00 | 5.00  | 1.00 | [74] |
|               | Dianshan Lake (Clam)                                | 4800–25,000 (14,400/-)              | 55.00 | 24.00 | 10.00 | 11.00 | 16.00 | 40.00 | 29.00 | 11.00 | 3.70  | 0.30 | [74] |
|               | Dianshan Lake (Snail)                               | 7800–16,000 (12,100/-)              | 48.00 | 25.00 | 13.00 | 14.00 | 14.00 | 39.00 | 31.00 | 12.00 | 3.80  | 0.20 | [74] |
|               | Dianshan Lake (Shrimp)                              | 2000–3400 (2600/-)                  | 61.00 | 28.00 | 7.00  | 4.00  | 24.00 | 50.00 | 20.00 | 6.00  | 0.00  | 0.00 | [74] |
|               | Taizhou (Hull, e-waste dismantling area)            | 47.6–387 (95.2/-)                   | 39.70 | 33.80 | 15.70 | 10.80 | 21.10 | 43.20 | 29.60 | 4.50  | 1.40  | 0.20 | [42] |

|                |                                             |                       |       |       |       |       |       |       |       |       |       |       |      |
|----------------|---------------------------------------------|-----------------------|-------|-------|-------|-------|-------|-------|-------|-------|-------|-------|------|
| Southern China | Taizhou (Rice, e-waste dismantling area)    | 4.90–55.1 (17.6/-)    | 35.90 | 34.20 | 17.80 | 12.20 | 27.60 | 38.40 | 23.10 | 8.70  | 1.70  | 0.50  | [42] |
|                | Taizhou (Snail, e-waste dismantling area)   | 137–821 (314/-)       | 31.80 | 35.50 | 16.00 | 16.70 | 18.60 | 39.00 | 29.50 | 9.10  | 2.30  | 1.50  | [42] |
|                | Dongjiang (Fish)                            | 53.0–614 (180/-)      | 35.10 | 28.20 | 19.40 | 17.50 | 5.13  | 29.00 | 37.70 | 21.50 | 6.45  | 0.29  | [76] |
|                | Pearl River Estuary (Chinese herring)       | 79.0–240 (-/95.0)     | 21.60 | 24.60 | 24.80 | 29.00 | 7.60  | 19.40 | 29.10 | 25.50 | 12.10 | 6.30  | [77] |
|                | Pearl River Estuary (Sardine)               | 73.0–160 (-/110)      | 21.50 | 21.50 | 27.50 | 28.50 | 7.70  | 17.00 | 27.60 | 24.50 | 15.40 | 7.80  | [77] |
|                | Pearl River Estuary (Silver pomfret)        | 101–270 (-/130)       | 21.80 | 20.30 | 25.90 | 32.00 | 9.30  | 21.90 | 25.50 | 23.20 | 14.00 | 6.10  | [77] |
|                | Pearl River Estuary (Tapertail anchovy)     | 62.0–150 (-/89.0)     | 25.10 | 24.00 | 24.70 | 26.20 | 10.00 | 22.90 | 27.20 | 23.60 | 11.00 | 5.30  | [77] |
|                | Pearl River Estuary (Bombay duck)           | 61.0–120 (-/73.0)     | 17.30 | 24.30 | 27.00 | 31.40 | 8.50  | 17.60 | 25.20 | 26.10 | 15.70 | 6.90  | [77] |
|                | Pearl River Estuary (Shiba shrimp)          | 390–930 (-/670)       | 15.50 | 23.60 | 32.20 | 28.70 | 1.90  | 10.00 | 29.60 | 33.20 | 17.50 | 7.80  | [77] |
|                | Pearl River Estuary (Sword prawn)           | 100–140 (-/130)       | 16.20 | 22.60 | 29.60 | 31.60 | 9.30  | 15.50 | 27.90 | 26.40 | 13.90 | 7.00  | [77] |
|                | Pearl River Estuary (Japanese stone crab)   | 98–190 (-/130)        | 20.30 | 28.20 | 26.60 | 24.90 | 9.20  | 19.60 | 26.30 | 25.40 | 13.10 | 6.40  | [77] |
|                | Pearl River Estuary (Asiatic hard clam)     | 120–760 (-/200)       | 14.60 | 18.10 | 30.20 | 37.20 | 8.10  | 20.20 | 27.20 | 23.50 | 13.80 | 7.20  | [77] |
|                | Pearl River Estuary (Manila clam)           | 190–230 (-/215)       | 16.60 | 21.10 | 29.30 | 33.00 | 12.20 | 22.80 | 25.70 | 22.00 | 11.30 | 6.00  | [77] |
|                | Pearl River Estuary (Squid)                 | 76.0–93.0 (-/90.0)    | 22.20 | 27.70 | 23.10 | 27.10 | 11.50 | 24.60 | 26.30 | 21.60 | 10.70 | 5.30  | [77] |
|                | Pearl River Estuary (Light maigre)          | 94.0–350 (220/-)      | 33.00 | 31.00 | 15.00 | 21.00 | 21.00 | 24.00 | 34.50 | 14.50 | 4.00  | 2.00  | [32] |
|                | Pearl River Estuary (Gizzard shad)          | 150–370 (230/-)       | 32.00 | 31.00 | 19.00 | 18.00 | 6.00  | 17.00 | 32.00 | 25.00 | 15.00 | 5.00  | [32] |
|                | Pearl River Estuary (Largescale mullet)     | 250–270 (260/-)       | 31.00 | 26.00 | 20.00 | 23.00 | 10.00 | 14.00 | 25.50 | 22.50 | 17.00 | 11.00 | [32] |
|                | Pearl River Estuary (Yellowfin porgy)       | 74.0 (-/-)            | 41.00 | 37.00 | 12.00 | 10.00 | 15.00 | 23.00 | 32.00 | 20.00 | 7.00  | 3.00  | [32] |
|                | Pearl River Estuary (Japanese sea perch)    | 170 (-/-)             | 42.00 | 30.00 | 15.00 | 13.00 | 16.00 | 22.50 | 35.50 | 19.00 | 6.00  | 1.00  | [32] |
|                | Pearl River Estuary (Sea catfish)           | 230 (-/-)             | 31.50 | 32.00 | 20.50 | 16.00 | 41.00 | 9.00  | 22.50 | 13.50 | 8.00  | 6.00  | [32] |
|                | Pearl River Estuary (Ridgetail white prawn) | 100–810 (380/-)       | 31.00 | 29.00 | 20.50 | 19.50 | 29.70 | 17.30 | 31.00 | 17.00 | 4.50  | 0.50  | [32] |
|                | Pearl River Estuary (Mangrove crab)         | 1200–2000 (1600/-)    | 31.00 | 38.00 | 18.00 | 13.00 | 58.00 | 14.00 | 23.00 | 5.00  | 0.00  | 0.00  | [32] |
|                | Pearl River Estuary (Oyster)                | 1000–1600 (1200/-)    | 27.50 | 36.50 | 19.00 | 17.00 | 13.00 | 20.00 | 37.50 | 20.00 | 7.50  | 2.00  | [32] |
|                | Hong Kong waters ( <i>A. fasciatus</i> )    | 41.7–50.0 (45.8/45.8) | 43.30 | 30.80 | 18.90 | 7.00  | -     | -     | -     | -     | -     | -     | [78] |
|                | Hong Kong waters ( <i>C. thrissa</i> )      | 156–569 (298/268)     | 27.00 | 26.10 | 21.70 | 25.20 | -     | -     | -     | -     | -     | -     | [78] |
|                | Hong Kong waters ( <i>C. arel</i> )         | 47.2 (-/-)            | 34.00 | 28.00 | 22.00 | 16.00 | -     | -     | -     | -     | -     | -     | [78] |
|                | Hong Kong waters ( <i>D. russelii</i> )     | 73.6 (-/-)            | 36.00 | 31.00 | 20.00 | 13.00 | -     | -     | -     | -     | -     | -     | [78] |
|                | Hong Kong waters ( <i>E. cardinalis</i> )   | 97.2–114 (106/106)    | 36.00 | 30.00 | 21.00 | 13.00 | -     | -     | -     | -     | -     | -     | [78] |
|                | Hong Kong waters ( <i>I. japonica</i> )     | 15.3 (-/-)            | 37.00 | 31.00 | 20.00 | 12.00 | -     | -     | -     | -     | -     | -     | [78] |
|                | Hong Kong waters ( <i>J. heterolepis</i> )  | 25.0–118 (64.2/57.0)  | 36.80 | 31.40 | 20.60 | 11.20 | -     | -     | -     | -     | -     | -     | [78] |
|                | Hong Kong waters ( <i>L. brevirostris</i> ) | 59.7–83.3 (69.4/68.8) | 39.10 | 30.60 | 19.70 | 10.60 | -     | -     | -     | -     | -     | -     | [78] |

|                                                            |                                        |       |       |       |       |   |   |   |   |   |   |      |
|------------------------------------------------------------|----------------------------------------|-------|-------|-------|-------|---|---|---|---|---|---|------|
| Hong Kong waters ( <i>P. macracanthus</i> )                | 15.3–48.6 (31.9/31.9)                  | 31.00 | 33.00 | 23.00 | 13.00 | - | - | - | - | - | - | [78] |
| Hong Kong waters ( <i>P. argentata</i> )                   | 54.2 (-/-)                             | 35.00 | 30.00 | 19.00 | 16.00 | - | - | - | - | - | - | [78] |
| Hong Kong waters ( <i>P. sextarius</i> )                   | 51.4–129 (90.3/90.3)                   | 38.00 | 29.00 | 21.00 | 12.00 | - | - | - | - | - | - | [78] |
| Hong Kong waters ( <i>P. indicus</i> )                     | 37.5–83.3 (53.7/40.3)                  | 36.00 | 31.00 | 20.00 | 13.00 | - | - | - | - | - | - | [78] |
| Hong Kong waters ( <i>R. richardsonii</i> )                | 20.8–41.7 (31.3/31.3)                  | 38.00 | 31.00 | 19.00 | 13.00 | - | - | - | - | - | - | [78] |
| Hong Kong waters ( <i>S. canaliculatus</i> )               | 50.2–186 (85.0/69.4)                   | 32–26 | 28–32 | 17–21 | 13–17 | - | - | - | - | - | - | [78] |
| Hong Kong waters ( <i>S. ovata</i> )                       | 43.1–69.4 (56.3/56.3)                  | 32.00 | 30.00 | 25.00 | 13.00 | - | - | - | - | - | - | [78] |
| Hong Kong waters ( <i>T. vagina</i> )                      | 22.2–34.7 (28.5/28.5)                  | 37.00 | 33.00 | 18.00 | 12.00 | - | - | - | - | - | - | [78] |
| Hong Kong waters ( <i>H. harpax</i> )                      | 34.7–72.2 (52.4/51.4)                  | 40.50 | 27.80 | 17.90 | 13.80 | - | - | - | - | - | - | [78] |
| Hong Kong waters ( <i>M. affinis</i> )                     | 11.1–41.7 (23.6/22.2)                  | 40–42 | 32–34 | 15–17 | 8–10  | - | - | - | - | - | - | [78] |
| Hong Kong waters ( <i>M. nepa</i> )                        | 11.1 (-/-)                             | 35.00 | 32.00 | 19.00 | 14.00 | - | - | - | - | - | - | [78] |
| Hong Kong waters ( <i>M. ensis</i> )                       | 15.3–20.8 (18.1/18.1)                  | 42.00 | 32.00 | 17.00 | 9.00  | - | - | - | - | - | - | [78] |
| Hong Kong waters ( <i>P. sanguinolentus</i> )              | 12.5–48.6 (21.9/16.7)                  | 41–43 | 32–34 | 15–17 | 8–11  | - | - | - | - | - | - | [78] |
| Hong Kong waters ( <i>P. pelagicus</i> )                   | 20.8 (-/-)                             | 41.00 | 30.00 | 17.00 | 12.00 | - | - | - | - | - | - | [78] |
| Hong Kong waters ( <i>P. trituberculatus</i> )             | 16.7–33.3 (26.9/30.6)                  | 38.00 | 32.00 | 20.00 | 11.00 | - | - | - | - | - | - | [78] |
| Hong Kong waters ( <i>A. ferruginea</i> )                  | 38.9 (-/-)                             | 31.00 | 36.00 | 19.00 | 13.00 | - | - | - | - | - | - | [78] |
| Hong Kong waters ( <i>B. rana</i> )                        | 34.7–54.2 (44.4/44.4)                  | 35.00 | 31.00 | 20.00 | 14.00 | - | - | - | - | - | - | [78] |
| Hong Kong waters ( <i>M. trapa</i> )                       | 19.4–26.4 (21.8/19.4)                  | 32.80 | 28.80 | 21.20 | 17.20 | - | - | - | - | - | - | [78] |
| Hong Kong waters ( <i>T. bacillum</i> )                    | 13.9–23.6 (18.8/18.8)                  | 34.00 | 30.00 | 23.00 | 14.00 | - | - | - | - | - | - | [78] |
| Qingyuan (White wagtail, e-waste dismantling area)         | 4700–13,000 (7600/-) <sup>a</sup>      | 27.00 | 29.00 | 27.00 | 17.00 | - | - | - | - | - | - | [79] |
| Qingyuan (Long-tailed shrike, e-waste dismantling area)    | 4300–9900 (6300/-) <sup>a</sup>        | 31.00 | 26.00 | 21.00 | 22.00 | - | - | - | - | - | - | [79] |
| Qingyuan (Red-flanked bluetail, e-waste dismantling area)  | 870–1700 (1200/-) <sup>a</sup>         | 28.00 | 27.00 | 24.00 | 20.00 | - | - | - | - | - | - | [79] |
| Qingyuan (Grey-backed thrush, e-waste dismantling area)    | 620–1900 (1200/-) <sup>a</sup>         | 31.00 | 29.00 | 24.00 | 16.00 | - | - | - | - | - | - | [79] |
| Qingyuan (Great tit, e-waste dismantling area)             | 6400–11,000 (8200/-) <sup>a</sup>      | 23.00 | 22.00 | 29.00 | 26.00 | - | - | - | - | - | - | [79] |
| Qingyuan (Oriental magpie-robin, e-waste dismantling area) | 4000–5400 (4900/-) <sup>a</sup>        | 24.00 | 25.00 | 26.00 | 25.00 | - | - | - | - | - | - | [79] |
| Qingyuan (Goldfinch, e-waste dismantling area)             | 9100–17,000 (12,000/-) <sup>a</sup>    | 30.00 | 27.00 | 25.00 | 18.00 | - | - | - | - | - | - | [79] |
| Qingyuan (Watersnake muscle, e-waste dismantling area)     | 29,000–250,000 (70,000/-) <sup>a</sup> | 20.00 | 36.00 | 30.00 | 14.00 | - | - | - | - | - | - | [80] |
| Qingyuan (Watersnake egg, e-waste dismantling area)        | 8400–81,000 (18,000/-) <sup>a</sup>    | 23.00 | 42.00 | 26.50 | 8.50  | - | - | - | - | - | - | [80] |
| Qingyuan (Fish, e-waste dismantling area)                  | 27,000–29,000 (28,000/-) <sup>a</sup>  | 33.10 | 37.60 | 19.10 | 10.20 | - | - | - | - | - | - | [80] |
| Qingyuan (Prawn, e-waste dismantling area)                 | 6100–9500 (7800/-) <sup>a</sup>        | 31.40 | 36.80 | 21.00 | 10.80 | - | - | - | - | - | - | [80] |
| Qingyuan (Warerbird egg, e-waste dismantling area)         | 1200–2500 (1800/-) <sup>a</sup>        | 33.80 | 23.20 | 29.60 | 13.30 | - | - | - | - | - | - | [80] |

|                 |                                           |                                     |       |       |       |       |       |       |       |       |       |      |   |      |
|-----------------|-------------------------------------------|-------------------------------------|-------|-------|-------|-------|-------|-------|-------|-------|-------|------|---|------|
| China sea areas | Guiyu (Pigeon, e-waste dismantling area)  | 4700–11,000 (7600/-) <sup>a</sup>   | -     | -     | -     | -     | -     | -     | -     | -     | -     | -    | - | [81] |
|                 | Guiyu (Catfish, e-waste dismantling area) | 11,400–70,400 (30,800) <sup>a</sup> | -     | -     | -     | -     | -     | -     | -     | -     | -     | -    | - | [81] |
|                 | Bohai Sea (Mollusk)                       | 64.9–5510 (1410/-)                  | 30.20 | 33.70 | 18.00 | 18.10 | 2.05  | 41.70 | 34.60 | 17.50 | 3.02  | 1.11 |   | [82] |
|                 | Bohai Sea (Gastropod)                     | 158–1460 (592/-)                    | 34.30 | 33.50 | 16.90 | 15.40 | 4.40  | 50.70 | 30.90 | 11.40 | 1.92  | 0.66 |   | [82] |
|                 | Bohai Sea (Bivalve)                       | 64.9–5510 (1850/-)                  | 28.70 | 33.70 | 18.40 | 19.20 | 1.17  | 38.30 | 36.00 | 19.80 | 3.44  | 1.28 |   | [82] |
|                 | Bohai Sea (Bivalve)                       | 476–3270 (1710/-)                   | 28.70 | 37.70 | 19.40 | 14.20 | 2.73  | 38.50 | 35.60 | 15.93 | 4.65  | 2.61 |   | [64] |
|                 | Yellow Sea (Fish)                         | 13.5–60.0 (-/-)                     | -     | -     | -     | -     | -     | -     | -     | -     | -     | -    |   | [84] |
|                 | East China Sea (Fish)                     | 15.4–63.2 (-/-)                     | -     | -     | -     | -     | -     | -     | -     | -     | -     | -    |   | [84] |
|                 | South China Sea (Fish)                    | 9.30–38.0 (-/-)                     | -     | -     | -     | -     | -     | -     | -     | -     | -     | -    |   | [84] |
|                 | South China Sea (Porpoises)               | 280–3900 (1800/1800)                | 37.10 | 28.70 | 21.30 | 12.90 | -     | -     | -     | -     | -     | -    |   | [83] |
| Background area | South China Sea (Dolphins)                | 430–9100 (2500/1900)                | 25.50 | 27.50 | 23.90 | 23.10 | -     | -     | -     | -     | -     | -    |   | [83] |
|                 | Qinghai Lake (Fish)                       | 3.90–10.9 (6.50/-)                  | 36.00 | 27.00 | 20.00 | 17.00 | 21.10 | 36.00 | 24.80 | 10.20 | 5.90  | 2.00 |   | [85] |
|                 | Basum Lake (Fish)                         | 38.1–79.4 (64.6/-)                  | 37.00 | 26.00 | 19.00 | 16.00 | 19.60 | 34.90 | 26.70 | 12.20 | 5.20  | 1.40 |   | [85] |
|                 | Palgon Lake (Fish)                        | 4.40–35.0 (14.6/-)                  | 45.00 | 22.00 | 20.00 | 13.00 | 25.30 | 38.90 | 23.80 | 9.60  | 1.70  | 0.70 |   | [85] |
|                 | Yamdro Lake (Fish)                        | 5.00–55.6 (17.5/-)                  | 46.00 | 26.00 | 17.00 | 11.00 | 20.20 | 35.10 | 27.90 | 11.50 | 4.60  | 0.70 |   | [85] |
|                 | Manasarovar Lake (Fish)                   | 38.8–107 (58.5/-)                   | 50.00 | 23.00 | 15.00 | 12.00 | 16.20 | 34.40 | 31.20 | 13.10 | 4.30  | 0.80 |   | [85] |
|                 | Lhasa River (Fish)                        | 20.0–48.8 (40.9/-)                  | 35.00 | 26.00 | 22.00 | 17.00 | 18.60 | 24.70 | 22.80 | 16.00 | 10.20 | 7.70 |   | [85] |
|                 | Tibetan Plateau (Plant)                   | 71.1–300 (173/-)                    | 66.60 | 18.90 | 6.80  | 7.70  | 6.70  | 28.20 | 36.50 | 20.80 | 5.60  | 2.20 |   | [51] |
|                 | Tibetan Plateau (Plateau pika)            | -(258/-)                            | 48.30 | 23.00 | 13.20 | 15.50 | 10.30 | 31.10 | 31.70 | 15.70 | 7.30  | 3.90 |   | [51] |
|                 | Tibetan Plateau (Eagle)                   | -(108/-)                            | 53.80 | 20.30 | 13.20 | 12.70 | 9.90  | 24.80 | 31.30 | 22.50 | 7.70  | 3.80 |   | [51] |
|                 | Shergyla Mountain (Bark)                  | 2900–7000 (5000/5500) <sup>a</sup>  | 34.90 | 30.30 | 12.50 | 22.30 | 0.50  | 23.70 | 40.60 | 23.30 | 9.40  | 2.50 |   | [52] |
|                 | Shergyla Mountain (Needle)                | 2400–6400 (4400/3900) <sup>a</sup>  | 35.30 | 29.10 | 14.40 | 21.20 | 0.40  | 12.80 | 37.70 | 32.80 | 13.60 | 2.70 |   | [52] |
|                 | Shergyla Mountain (Lichen)                | 2000–6100 (4100/5100) <sup>a</sup>  | 44.70 | 33.30 | 12.20 | 9.80  | 0.40  | 16.60 | 37.10 | 26.20 | 15.90 | 3.80 |   | [52] |
|                 | Shergyla Mountain (Mosse)                 | 1500–4400 (3000/3200) <sup>a</sup>  | 45.00 | 25.20 | 13.60 | 16.20 | 1.20  | 21.80 | 33.30 | 27.40 | 13.60 | 2.70 |   | [52] |
|                 | Nyingchi (Lichen)                         | 1400–4800 (3100/2800) <sup>a</sup>  | 59.20 | 25.50 | 8.20  | 7.10  | 0.30  | 14.80 | 34.50 | 34.60 | 13.60 | 2.20 |   | [52] |
|                 | Ngari (Mosse)                             | 1600–5200 (2700/3500) <sup>a</sup>  | 55.40 | 29.70 | 9.40  | 5.50  | 0.30  | 17.50 | 34.70 | 33.20 | 12.50 | 1.80 |   | [52] |
|                 | Namco (Mosse)                             | 3900–5300 (4600/4500) <sup>a</sup>  | 50.20 | 29.60 | 12.30 | 7.90  | 0.60  | 13.20 | 32.00 | 36.60 | 14.50 | 3.10 |   | [52] |

<sup>a</sup>lipid weight (lw).

ND: not detected.

-: data not available.

Table S12. Concentrations of SCCPs in food.

| Sampling area                                        | Sampling time       | Sample                                        | Concentration (ng/g lw)                                    | Reference |
|------------------------------------------------------|---------------------|-----------------------------------------------|------------------------------------------------------------|-----------|
| Beijing                                              | 1990s and 2007–2009 | Diet                                          | <0.20–0.60 (1993); 8.50–28.0 (2009) <sup>b</sup>           | [87]      |
| Beijing                                              | 2016                | Diet and milk powder                          | 24.4–546 (diet); 16.2–20.5 (milk powder) <sup>b</sup>      | [8]       |
| Beijing                                              | 2018                | Meat and seafood                              | 620–8400 <sup>b</sup>                                      | [88]      |
| Beijing                                              | 2014–2016           | Diet                                          | 3.26–52.1 (raw food); 0.67–10.8 (cooked food) <sup>a</sup> | [89]      |
| Shanghai                                             | 2012                | Fish                                          | 36.0–801 <sup>b</sup>                                      | [90]      |
| Dalian                                               | 2012                | Seafood                                       | 77.0–8250 <sup>b</sup>                                     | [91]      |
| Jinan                                                | 2019                | Supermarket fresh products                    | 149–7666                                                   | [92]      |
| 5 cities in China <sup>c</sup>                       | 2010 and 2012       | Cooking oil, fried confectioner and raw seeds | <2.00–1200 <sup>a</sup>                                    | [93]      |
| 20 provinces of China <sup>d</sup>                   | 2011                | Meat                                          | 15.7–469 <sup>a</sup>                                      | [94]      |
| 18 Chinese provinces <sup>e</sup>                    | 2017                | Aquatic foods                                 | 215–4200 <sup>a</sup>                                      | [95]      |
| 19 Chinese provinces <sup>f</sup>                    | 2011                | Cereal and legume                             | 51.6–981 (cereal); 47.1–801 (legume) <sup>a</sup>          | [96]      |
| 9 cities in the northern China <sup>g</sup>          | 2016                | Diet                                          | 2.30–496 <sup>a</sup>                                      | [97]      |
| 5 Chinese provinces <sup>h</sup>                     | 2018                | Raw milk                                      | 130–5770                                                   | [98]      |
| PRD and YRD                                          | 2011–2012           | Fish                                          | 3000–41,000 (PRD); 220–51,000 (YRD)                        | [99]      |
| China                                                | 2016                | Fish meal                                     | 4200–16,000                                                | [100]     |
| An e-waste recycling area in Guiyu                   | 2013                | Chicken and goose eggs                        | 2300–6800 (chicken eggs); ND–150,000 (goose eggs)          | [101]     |
| An e-waste dismantling area in Taizhou               | 2008 and 2010       | Rice                                          | 4.90–55.1 <sup>b</sup>                                     | [42]      |
| An e-waste polluted area in Qingyuan                 | 2013 and 2016       | Eggs                                          | 477–111,000                                                | [102]     |
| A mega e-waste recycling industrial park in Qingyuan | 2017                | Local food                                    | 892–605,000                                                | [24]      |
| Longtang town in Qingyuan                            | 2011–2012           | Chicken                                       | 460–13,000 <sup>b</sup>                                    | [103]     |

<sup>a</sup>wet weight (ww).<sup>b</sup>dry weight (dw).<sup>c</sup>Beijing, Fushun, Hong Kong, Shanghai and Shenyang.<sup>d</sup>Beijing, Shanghai, Hebei, Henan, Liaoning, Jilin, Heilongjiang, Hunan, Fujian, Zhejiang, Jiangsu, Jiangxi, Ningxia, Guangdong, Neimenggu, Shanxi, Hubei, Guangxi, Sichuan, Qinghai.<sup>e</sup>Beijing, Fujian, Guangdong, Guangxi, Hebei, Henan, Heilongjiang, Hubei, Hunan, Jilin, Jiangsu, Liaoning, Neimenggu, Ningxia, Qinghai, Shanxi, Shanghai, Sichuan.<sup>f</sup>Fujian, Guangdong, Guangxi, Hebei, Heilongjiang, Henan, Hubei, Hunan, Jiangsu, Jiangxi, Jilin, Liaoning, Neimenggu, Ningxia, Qinghai, Shanghai, Shanxi, Sichuan and Zhejiang.<sup>g</sup>Beijing, Shijiazhuang, Zhangjiakou, Chengde, Qinhuangdao, Langfang, Xingtai, Tangshan and Hulunbeier.<sup>h</sup>Neimenggu, Hebei, Shandong, Henan and Hubei.

Table S13. Comparison of the concentrations (ng/g lw) and compositional profiles (%) of SCCPs in food.

| Region             | Location                        | Range (mean/median)                | C <sub>10</sub> | C <sub>11</sub> | C <sub>12</sub> | C <sub>13</sub> | Cl <sub>5</sub> | Cl <sub>6</sub> | Cl <sub>7</sub> | Cl <sub>8</sub> | Cl <sub>9</sub> | Cl <sub>10</sub> | Reference |
|--------------------|---------------------------------|------------------------------------|-----------------|-----------------|-----------------|-----------------|-----------------|-----------------|-----------------|-----------------|-----------------|------------------|-----------|
| Northeastern China | Dalian (Shellfish)              | 111–12,200 (3840/-) <sup>b</sup>   | 36.50           | 31.80           | 18.00           | 13.70           | 3.43            | 23.40           | 41.30           | 24.60           | 5.72            | 1.51             | [91]      |
|                    | Dalian (Shrimp/crab)            | 583–7260 (3710/-) <sup>b</sup>     | 19.40           | 21.20           | 26.40           | 32.90           | 1.30            | 19.70           | 45.40           | 26.40           | 6.53            | 0.60             | [91]      |
|                    | Dalian (Fish)                   | 100–5370 (1210/-) <sup>b</sup>     | 31.30           | 28.20           | 22.20           | 18.40           | 11.60           | 27.10           | 34.30           | 19.60           | 5.86            | 1.50             | [91]      |
|                    | Dalian (Other)                  | 405–10,100 (6220/-) <sup>b</sup>   | 31.60           | 29.90           | 21.60           | 17.00           | 1.67            | 23.30           | 41.70           | 25.40           | 7.30            | 0.67             | [91]      |
|                    | Fushun (Cooking oil, 2010)      | <9.00–800 (-/105) <sup>b</sup>     | 16.06           | 28.00           | 22.38           | 33.56           | 29.84           | 31.21           | 27.23           | 9.77            | 1.94            | 0.00             | [93]      |
|                    | Fushun (Cooking oil, 2012)      | <20.0–1200 (-/<20.0) <sup>b</sup>  | 13.40           | 15.11           | 33.83           | 37.66           | 58.88           | 14.59           | 12.44           | 9.63            | 4.46            | 0.00             | [93]      |
|                    | Fushun (Fried confectionery)    | 31.0–1000 (-/80.0) <sup>b</sup>    | 29.40           | 30.57           | 17.18           | 22.85           | 45.07           | 26.62           | 16.77           | 8.81            | 2.73            | 0.00             | [93]      |
|                    | Shenyang (Cooking oil)          | <20.0–210 (-/<20.0) <sup>b</sup>   | 14.60           | 15.17           | 29.93           | 40.30           | 56.50           | 13.74           | 11.40           | 13.23           | 5.14            | 0.00             | [93]      |
|                    | Shenyang (Fried confectionery)  | 19.0–89.0 (-/34.0) <sup>b</sup>    | 24.48           | 32.29           | 23.18           | 20.05           | 40.77           | 25.00           | 16.92           | 12.31           | 5.00            | 0.00             | [93]      |
|                    | Shenyang and Fushun (Raw seeds) | <2.00–68.0 (-/22.0) <sup>b</sup>   | 26.20           | 34.40           | 18.90           | 20.60           | 64.81           | 22.68           | 9.01            | 2.46            | 1.04            | 0.00             | [93]      |
|                    | Liaoning (Meat)                 | -(140/-) <sup>a</sup>              | 66.81           | 25.97           | 4.65            | 2.58            | -               | -               | -               | -               | -               | -                | [94]      |
|                    | Liaoning (Aquatic foods)        | -(2913/-) <sup>a</sup>             | 63.02           | 29.25           | 6.63            | 1.11            | -               | -               | -               | -               | -               | -                | [95]      |
|                    | Liaoning (Cereals)              | -(669/-) <sup>a</sup>              | 17.20           | 11.37           | 9.50            | 61.93           | -               | -               | -               | -               | -               | -                | [96]      |
|                    | Liaoning (Legumes)              | -(423/-) <sup>a</sup>              | 90.13           | 7.78            | 0.97            | 1.11            | -               | -               | -               | -               | -               | -                | [96]      |
|                    | Jilin (Meat)                    | -(40.6/-) <sup>a</sup>             | 79.56           | 18.23           | 1.72            | 0.49            | -               | -               | -               | -               | -               | -                | [94]      |
|                    | Jilin (Aquatic foods)           | -(503/-) <sup>a</sup>              | 55.47           | 28.23           | 7.69            | 8.61            | -               | -               | -               | -               | -               | -                | [95]      |
|                    | Jilin (Cereals)                 | -(275/-) <sup>a</sup>              | 80.20           | 12.10           | 3.97            | 3.72            | -               | -               | -               | -               | -               | -                | [96]      |
|                    | Jilin (Legumes)                 | -(143/-) <sup>a</sup>              | 57.63           | 16.88           | 11.48           | 14.01           | -               | -               | -               | -               | -               | -                | [96]      |
|                    | Heilongjiang (Meat)             | -(21.6/-) <sup>a</sup>             | 89.27           | 10.18           | 0.46            | 0.09            | -               | -               | -               | -               | -               | -                | [94]      |
|                    | Heilongjiang (Aquatic foods)    | -(730/-) <sup>a</sup>              | 72.80           | 21.39           | 3.61            | 2.21            | -               | -               | -               | -               | -               | -                | [95]      |
|                    | Heilongjiang (Cereals)          | -(585/-) <sup>a</sup>              | 86.06           | 10.68           | 1.86            | 1.40            | -               | -               | -               | -               | -               | -                | [96]      |
|                    | Heilongjiang (Legumes)          | -(579/-) <sup>a</sup>              | 79.25           | 12.14           | 3.57            | 5.04            | -               | -               | -               | -               | -               | -                | [96]      |
| Northern China     | Beijing (Diet, 1993)            | <0.20–0.60 (-/-) <sup>b</sup>      | -               | -               | -               | -               | -               | -               | -               | -               | -               | -                | [87]      |
|                    | Beijing (Diet, 2009)            | 8.50–28.0 (-/15.0) <sup>b</sup>    | 29.70           | 29.70           | 18.30           | 22.30           | 31.40           | 35.70           | 23.30           | 8.00            | 1.60            | 0.00             | [87]      |
|                    | Beijing (Diet)                  | 24.4–546 (113/79.3) <sup>b</sup>   | 14.51           | 27.17           | 25.93           | 32.39           | 0.13            | 11.43           | 41.28           | 33.30           | 12.93           | 0.93             | [8]       |
|                    | Beijing (Milk powder)           | 16.2–20.5 (18.3/18.1) <sup>b</sup> | 0.88            | 20.36           | 27.64           | 51.12           | 0.05            | 6.46            | 45.98           | 40.45           | 7.01            | 0.05             | [8]       |
|                    | Beijing (Drinking water)        | 20.0–26.0 (23.0/23.0) <sup>c</sup> | 32.28           | 61.17           | 2.69            | 3.86            | 0.54            | 54.83           | 31.31           | 8.62            | 4.69            | 0.00             | [8]       |
|                    | Beijing (Shellfish)             | 37.4–1690 (294/-) <sup>b</sup>     | 37.00           | 27.00           | 18.40           | 17.60           | 10.20           | 27.50           | 36.00           | 20.80           | 4.93            | 0.56             | [104]     |
|                    | Beijing (Fish)                  | 50.0–300 (143/-) <sup>b</sup>      | 44.70           | 28.70           | 14.40           | 12.20           | 7.90            | 29.90           | 36.70           | 20.50           | 4.52            | 0.39             | [104]     |



|                                           |                                    |       |       |       |       |       |       |       |       |      |      |       |
|-------------------------------------------|------------------------------------|-------|-------|-------|-------|-------|-------|-------|-------|------|------|-------|
| Beijing (Meat)                            | 31.3–1850 (355/-) <sup>b</sup>     | 33.00 | 27.70 | 19.70 | 19.60 | 10.70 | 28.90 | 34.40 | 20.50 | 4.84 | 0.58 | [104] |
| Beijing (Liver)                           | 45.0–250 (95.8/-) <sup>b</sup>     | 40.40 | 26.40 | 15.60 | 17.60 | 16.50 | 31.60 | 31.00 | 16.40 | 4.14 | 0.34 | [104] |
| Beijing (Vegetable)                       | 43.4–375 (212/-) <sup>b</sup>      | 31.10 | 46.80 | 11.90 | 10.20 | 7.43  | 24.00 | 29.30 | 35.80 | 3.29 | 0.25 | [104] |
| Beijing (Fruit)                           | 18.4–244 (106/-) <sup>b</sup>      | 36.80 | 34.60 | 12.50 | 16.20 | 19.30 | 26.40 | 32.10 | 17.90 | 4.11 | 0.08 | [104] |
| Beijing (Fish)                            | 8400 (-/-) <sup>b</sup>            | -     | -     | -     | -     | -     | -     | -     | -     | -    | -    | [88]  |
| Beijing (Clams)                           | 6300 (-/-) <sup>b</sup>            | -     | -     | -     | -     | -     | -     | -     | -     | -    | -    | [88]  |
| Beijing (Prawns)                          | 5200 (-/-) <sup>b</sup>            | -     | -     | -     | -     | -     | -     | -     | -     | -    | -    | [88]  |
| Beijing (Pork)                            | 720 (-/-) <sup>b</sup>             | -     | -     | -     | -     | -     | -     | -     | -     | -    | -    | [88]  |
| Beijing (Beef)                            | 620 (-/-) <sup>b</sup>             | -     | -     | -     | -     | -     | -     | -     | -     | -    | -    | [88]  |
| Beijing (Chicken)                         | 880 (-/-) <sup>b</sup>             | -     | -     | -     | -     | -     | -     | -     | -     | -    | -    | [88]  |
| Beijing (Raw food)                        | 3.26–52.1 (-/-) <sup>a</sup>       | -     | -     | -     | -     | -     | -     | -     | -     | -    | -    | [89]  |
| Beijing (Cooked food)                     | 0.67–10.8 (-/-) <sup>a</sup>       | -     | -     | -     | -     | -     | -     | -     | -     | -    | -    | [89]  |
| Beijing (Cooking oil)                     | 18.0–1100 (-/520) <sup>b</sup>     | 16.33 | 44.76 | 9.31  | 29.60 | 24.29 | 37.94 | 27.14 | 8.43  | 2.21 | 0.00 | [93]  |
| Beijing (Fried confectionery)             | 11.0–160 (-/100) <sup>b</sup>      | 19.07 | 27.94 | 18.91 | 34.09 | 33.16 | 33.32 | 24.31 | 7.69  | 1.52 | 0.00 | [93]  |
| Beijing (Meat)                            | -(118/-) <sup>a</sup>              | 73.33 | 21.68 | 3.98  | 1.02  | -     | -     | -     | -     | -    | -    | [94]  |
| Beijing (Aquatic foods)                   | -(934/-) <sup>a</sup>              | 74.40 | 22.69 | 1.81  | 1.10  | -     | -     | -     | -     | -    | -    | [95]  |
| Beijing (Legumes)                         | -(197/-) <sup>a</sup>              | 74.62 | 13.71 | 5.89  | 5.79  | -     | -     | -     | -     | -    | -    | [96]  |
| Hebei (Meat)                              | -(207/-) <sup>a</sup>              | 61.18 | 29.38 | 6.02  | 3.42  | -     | -     | -     | -     | -    | -    | [94]  |
| Hebei (Aquatic foods)                     | -(215/-) <sup>a</sup>              | 72.76 | 22.06 | 3.64  | 1.54  | -     | -     | -     | -     | -    | -    | [95]  |
| Hebei (Cereals)                           | -(981/-) <sup>a</sup>              | 23.24 | 11.21 | 8.67  | 56.87 | -     | -     | -     | -     | -    | -    | [96]  |
| Hebei (Legumes)                           | -(801/-) <sup>a</sup>              | 90.85 | 7.87  | 0.51  | 0.76  | -     | -     | -     | -     | -    | -    | [96]  |
| Hebei (Milk)                              | 1420–3210 (2174/1860)              | -     | -     | -     | -     | -     | -     | -     | -     | -    | -    | [98]  |
| Neimenggu (Meat)                          | -(171/-) <sup>a</sup>              | 78.99 | 19.19 | 1.35  | 0.47  | -     | -     | -     | -     | -    | -    | [94]  |
| Neimenggu (Aquatic foods)                 | -(1053/-) <sup>a</sup>             | 73.17 | 23.57 | 1.92  | 1.35  | -     | -     | -     | -     | -    | -    | [95]  |
| Neimenggu (Cereals)                       | -(336/-) <sup>a</sup>              | 89.61 | 8.13  | 1.31  | 0.95  | -     | -     | -     | -     | -    | -    | [96]  |
| Neimenggu (Legumes)                       | -(92.2/-) <sup>a</sup>             | 70.14 | 16.07 | 5.43  | 8.36  | -     | -     | -     | -     | -    | -    | [96]  |
| Neimenggu-A (Milk)                        | 490–1870 (1088/1040)               | -     | -     | -     | -     | -     | -     | -     | -     | -    | -    | [98]  |
| Neimenggu-B (Milk)                        | 130–700 (490/535)                  | -     | -     | -     | -     | -     | -     | -     | -     | -    | -    | [98]  |
| Beijing, Hebei and Neimenggu (Tubers)     | 14.5–242 (61.5/51.5) <sup>a</sup>  | -     | -     | -     | -     | -     | -     | -     | -     | -    | -    | [97]  |
| Beijing, Hebei and Neimenggu (Vegetables) | 16.4–78.3 (48.9/48.6) <sup>a</sup> | -     | -     | -     | -     | -     | -     | -     | -     | -    | -    | [97]  |
| Beijing, Hebei and Neimenggu (Cereals)    | 7.95–214 (77.0/60.0) <sup>a</sup>  | -     | -     | -     | -     | -     | -     | -     | -     | -    | -    | [97]  |

|               |                                              |                                    |       |       |       |       |       |       |       |       |       |      |      |
|---------------|----------------------------------------------|------------------------------------|-------|-------|-------|-------|-------|-------|-------|-------|-------|------|------|
| Eastern China | Beijing, Hebei and Neimenggu (Legumes)       | 41.7–260 (118/109) <sup>a</sup>    | -     | -     | -     | -     | -     | -     | -     | -     | -     | -    | [97] |
|               | Beijing, Hebei and Neimenggu (Eggs)          | 13.6–116 (86.6/103) <sup>a</sup>   | -     | -     | -     | -     | -     | -     | -     | -     | -     | -    | [97] |
|               | Beijing, Hebei and Neimenggu (Milk)          | 2.30–39.6 (25.6/33.1) <sup>a</sup> | -     | -     | -     | -     | -     | -     | -     | -     | -     | -    | [97] |
|               | Beijing, Hebei and Neimenggu (Meat)          | 28.6–496.5 (154/113) <sup>a</sup>  | -     | -     | -     | -     | -     | -     | -     | -     | -     | -    | [97] |
|               | Beijing, Hebei and Neimenggu (Fruits)        | 6.34–168 (60.2/42.9) <sup>a</sup>  | -     | -     | -     | -     | -     | -     | -     | -     | -     | -    | [97] |
|               | Beijing, Hebei and Neimenggu (Aquatic foods) | 15.0–123 (62.4/51.3) <sup>a</sup>  | -     | -     | -     | -     | -     | -     | -     | -     | -     | -    | [97] |
|               | Shanghai (Fish)                              | 36.0–801 (162/-) <sup>b</sup>      | 40.60 | 27.60 | 16.80 | 15.00 | 6.43  | 32.60 | 36.80 | 19.30 | 5.91  | 3.70 | [90] |
|               | Shanghai (Cooking oil)                       | <9.00–240 (-/<9.00) <sup>b</sup>   | 12.94 | 19.57 | 25.17 | 42.31 | 44.51 | 30.45 | 14.71 | 7.05  | 3.28  | 0.00 | [93] |
|               | Shanghai (Meat)                              | -(58.0/-) <sup>a</sup>             | 84.97 | 13.64 | 1.04  | 0.35  | -     | -     | -     | -     | -     | -    | [94] |
|               | Shanghai (Aquatic foods)                     | -(2778/-) <sup>a</sup>             | 75.11 | 21.77 | 2.17  | 0.95  | -     | -     | -     | -     | -     | -    | [95] |
|               | Shanghai (Cereals)                           | -(87.1/-) <sup>a</sup>             | 73.48 | 17.22 | 5.17  | 4.13  | -     | -     | -     | -     | -     | -    | [96] |
|               | Shanghai (Legumes)                           | -(419/-) <sup>a</sup>              | 87.89 | 8.43  | 1.12  | 2.56  | -     | -     | -     | -     | -     | -    | [96] |
|               | Shandong (Milk)                              | 930–2720 (1355/1190)               | -     | -     | -     | -     | -     | -     | -     | -     | -     | -    | [98] |
|               | Jinan (Vegetables)                           | 86.1–601 (268/194) <sup>b</sup>    | 37.00 | 23.00 | 22.00 | 18.00 | 5.00  | 24.50 | 31.00 | 22.50 | 11.00 | 6.00 | [92] |
|               | Jinan (Fruit)                                | 79.8–244 (134/120) <sup>b</sup>    | 36.00 | 24.00 | 22.00 | 18.00 | 5.00  | 23.00 | 31.00 | 22.00 | 12.00 | 7.00 | [92] |
|               | Jinan (Grains)                               | 58.6–154 (104/105) <sup>b</sup>    | 45.00 | 24.00 | 15.50 | 15.50 | 7.50  | 30.50 | 30.00 | 18.00 | 9.00  | 5.00 | [92] |
|               | Jinan (Meat)                                 | 224–399 (349/387) <sup>b</sup>     | 29.50 | 21.00 | 26.00 | 23.50 | 4.00  | 19.00 | 31.00 | 25.00 | 13.00 | 8.00 | [92] |
|               | Jinan (Seafood)                              | 144–1977 (699/552) <sup>b</sup>    | 30.00 | 22.50 | 24.00 | 23.50 | 4.00  | 18.00 | 30.00 | 25.50 | 13.50 | 9.00 | [92] |
|               | Fujian (Meat)                                | -(121/-) <sup>a</sup>              | 72.62 | 22.17 | 3.72  | 1.49  | -     | -     | -     | -     | -     | -    | [94] |
|               | Fujian (Aquatic foods)                       | -(880/-) <sup>a</sup>              | 62.59 | 28.22 | 5.14  | 4.05  | -     | -     | -     | -     | -     | -    | [95] |
|               | Fujian (Cereals)                             | -(244/-) <sup>a</sup>              | 75.79 | 14.34 | 5.37  | 4.51  | -     | -     | -     | -     | -     | -    | [96] |
|               | Fujian (Legumes)                             | -(324/-) <sup>a</sup>              | 77.87 | 13.07 | 4.82  | 4.23  | -     | -     | -     | -     | -     | -    | [96] |
|               | Zhejiang (Meat)                              | -(469/-) <sup>a</sup>              | 37.89 | 36.40 | 18.60 | 7.11  | -     | -     | -     | -     | -     | -    | [94] |
|               | Zhejiang (Cereals)                           | -(625/-) <sup>a</sup>              | 44.97 | 10.67 | 6.27  | 38.09 | -     | -     | -     | -     | -     | -    | [96] |
|               | Zhejiang (Legumes)                           | -(243/-) <sup>a</sup>              | 75.31 | 14.24 | 5.64  | 4.81  | -     | -     | -     | -     | -     | -    | [96] |
|               | Jiangsu (Meat)                               | -(62.3/-) <sup>a</sup>             | 67.74 | 26.65 | 4.33  | 1.28  | -     | -     | -     | -     | -     | -    | [94] |
|               | Jiangsu (Aquatic foods)                      | -(1362/-) <sup>a</sup>             | 72.05 | 23.28 | 3.33  | 1.34  | -     | -     | -     | -     | -     | -    | [95] |
|               | Jiangsu (Cereals)                            | -(194/-) <sup>a</sup>              | 35.74 | 33.26 | 19.41 | 11.59 | -     | -     | -     | -     | -     | -    | [96] |
|               | Jiangsu (Legumes)                            | -(264/-) <sup>a</sup>              | 84.66 | 8.73  | 2.73  | 3.87  | -     | -     | -     | -     | -     | -    | [96] |
|               | Jiangxi (Meat)                               | -(15.7/-) <sup>a</sup>             | 85.26 | 12.82 | 1.28  | 0.64  | -     | -     | -     | -     | -     | -    | [94] |
|               | Jiangxi (Cereals)                            | -(120/-) <sup>a</sup>              | 54.15 | 24.25 | 12.04 | 9.55  | -     | -     | -     | -     | -     | -    | [96] |

|                |                                                 |                                 |       |       |       |       |       |       |       |      |      |      |      |
|----------------|-------------------------------------------------|---------------------------------|-------|-------|-------|-------|-------|-------|-------|------|------|------|------|
| Central China  | Yangtze River Delta (Crucian carp)              | 75.0–380 (190/-) <sup>b</sup>   | 43.00 | 30.00 | 15.00 | 11.00 | -     | -     | -     | -    | -    | -    | [99] |
|                | Yangtze River Delta (Bream)                     | 36.0–540 (140/-) <sup>b</sup>   | 42.00 | 26.00 | 16.00 | 15.00 | -     | -     | -     | -    | -    | -    | [99] |
|                | Yangtze River Delta (Yellow catfish)            | 21.0–800 (200/-) <sup>b</sup>   | 41.00 | 24.00 | 18.00 | 16.00 | -     | -     | -     | -    | -    | -    | [99] |
|                | Yangtze River Delta (Silver carp)               | 76.0–290 (170/-) <sup>b</sup>   | 44.00 | 25.00 | 16.00 | 16.00 | -     | -     | -     | -    | -    | -    | [99] |
|                | Yangtze River Delta (Black carp)                | 94.0–250 (150/-) <sup>b</sup>   | 35.00 | 29.00 | 18.00 | 18.00 | -     | -     | -     | -    | -    | -    | [99] |
|                | Yangtze River Delta (Brown croaker)             | 41.0–280 (123/-) <sup>b</sup>   | 42.00 | 27.00 | 16.00 | 16.00 | -     | -     | -     | -    | -    | -    | [99] |
|                | Yangtze River Delta (Large yellow croaker)      | 73.0–170 (110/-) <sup>b</sup>   | 37.00 | 22.00 | 20.00 | 21.00 | -     | -     | -     | -    | -    | -    | [99] |
|                | Yangtze River Delta (Ribbon fish)               | 46.0–140 (91.0/-) <sup>b</sup>  | 35.00 | 28.00 | 20.00 | 17.00 | -     | -     | -     | -    | -    | -    | [99] |
|                | Yangtze River Delta (Daggertooth pike conger)   | 80.0–85.0 (83.0/-) <sup>b</sup> | 33.00 | 26.00 | 18.00 | 22.00 | -     | -     | -     | -    | -    | -    | [99] |
|                | Yangtze River Delta (Japanese Spanish mackerel) | 78.0–140 (110/-) <sup>b</sup>   | 34.00 | 26.00 | 18.00 | 22.00 | -     | -     | -     | -    | -    | -    | [99] |
|                | Taizhou (Rice, e-waste dismantling area)        | 4.90–55.1 (17.6/-) <sup>b</sup> | 35.90 | 34.20 | 17.80 | 12.20 | 27.60 | 38.40 | 23.10 | 8.70 | 1.70 | 0.50 | [42] |
|                | Henan (Meat)                                    | -(260/-) <sup>a</sup>           | 68.05 | 28.10 | 3.19  | 0.65  | -     | -     | -     | -    | -    | -    | [94] |
|                | Henan (Aquatic foods)                           | -(551/-) <sup>a</sup>           | 62.60 | 25.77 | 6.80  | 4.83  | -     | -     | -     | -    | -    | -    | [95] |
|                | Henan (Cereals)                                 | -(238/-) <sup>a</sup>           | 68.34 | 18.91 | 6.96  | 5.79  | -     | -     | -     | -    | -    | -    | [96] |
|                | Henan (Legumes)                                 | -(47.1/-) <sup>a</sup>          | 59.70 | 22.39 | 10.02 | 7.89  | -     | -     | -     | -    | -    | -    | [96] |
|                | Henan (Milk)                                    | 1140–1610 (1363/1330)           | -     | -     | -     | -     | -     | -     | -     | -    | -    | -    | [98] |
|                | Hunan (Meat)                                    | -(43.6/-) <sup>a</sup>          | 81.42 | 16.51 | 1.61  | 0.46  | -     | -     | -     | -    | -    | -    | [94] |
|                | Hunan (Aquatic foods)                           | -(3476/-) <sup>a</sup>          | 78.62 | 18.47 | 2.24  | 0.67  | -     | -     | -     | -    | -    | -    | [95] |
|                | Hunan (Cereals)                                 | -(114/-) <sup>a</sup>           | 59.00 | 22.29 | 9.88  | 8.83  | -     | -     | -     | -    | -    | -    | [96] |
|                | Hunan (Legumes)                                 | -(242/-) <sup>a</sup>           | 86.26 | 9.57  | 1.77  | 2.39  | -     | -     | -     | -    | -    | -    | [96] |
| Southern China | Hubei (Meat)                                    | -(68.6/-) <sup>a</sup>          | 85.59 | 13.39 | 0.73  | 0.29  | -     | -     | -     | -    | -    | -    | [94] |
|                | Hubei (Aquatic foods)                           | -(385/-) <sup>a</sup>           | 79.00 | 15.90 | 3.38  | 1.72  | -     | -     | -     | -    | -    | -    | [95] |
|                | Hubei (Cereals)                                 | -(51.6/-) <sup>a</sup>          | 58.80 | 22.63 | 9.86  | 8.70  | -     | -     | -     | -    | -    | -    | [96] |
|                | Hubei (Legumes)                                 | -(247/-) <sup>a</sup>           | 42.63 | 20.94 | 19.12 | 17.31 | -     | -     | -     | -    | -    | -    | [96] |
|                | Hubei (Milk)                                    | 1200–5770 (2519/2260)           | -     | -     | -     | -     | -     | -     | -     | -    | -    | -    | [98] |
|                | Hong Kong (Cooking oil)                         | <9.0–230 (-/170) <sup>b</sup>   | 12.55 | 35.48 | 25.32 | 26.66 | 28.37 | 32.93 | 27.54 | 9.42 | 1.74 | 0.00 | [93] |
|                | Guangdong (Meat)                                | -(152/-) <sup>a</sup>           | 79.00 | 18.50 | 1.78  | 0.72  | -     | -     | -     | -    | -    | -    | [94] |
|                | Guangdong (Aquatic foods)                       | -(1379/-) <sup>a</sup>          | 47.68 | 33.45 | 10.89 | 7.98  | -     | -     | -     | -    | -    | -    | [95] |
|                | Guangdong (Cereals)                             | -(300/-) <sup>a</sup>           | 77.97 | 14.60 | 4.23  | 3.20  | -     | -     | -     | -    | -    | -    | [96] |
|                | Guangdong (Legumes)                             | -(692/-) <sup>a</sup>           | 68.33 | 19.65 | 7.50  | 4.52  | -     | -     | -     | -    | -    | -    | [96] |

|                                                           |                                   |       |       |       |       |       |       |       |       |      |      |       |
|-----------------------------------------------------------|-----------------------------------|-------|-------|-------|-------|-------|-------|-------|-------|------|------|-------|
| Guangxi (Meat)                                            | -(43.8/-) <sup>a</sup>            | 72.37 | 22.60 | 3.65  | 1.37  | -     | -     | -     | -     | -    | -    | [94]  |
| Guangxi (Aquatic foods)                                   | -(4200/-) <sup>a</sup>            | 46.71 | 35.57 | 12.83 | 4.88  | -     | -     | -     | -     | -    | -    | [95]  |
| Guangxi (Cereals)                                         | -(595/-) <sup>a</sup>             | 26.93 | 12.64 | 8.94  | 51.50 | -     | -     | -     | -     | -    | -    | [96]  |
| Guangxi (Legumes)                                         | -(753/-) <sup>a</sup>             | 85.08 | 9.01  | 2.39  | 3.52  | -     | -     | -     | -     | -    | -    | [96]  |
| Dongjiang River (Bream)                                   | 190–370 (310/-) <sup>b</sup>      | 31.00 | 32.00 | 22.00 | 15.00 | -     | -     | -     | -     | -    | -    | [99]  |
| Dongjiang River (Japanese sea perch)                      | 120–370 (270/-) <sup>b</sup>      | 38.00 | 33.00 | 18.00 | 11.00 | -     | -     | -     | -     | -    | -    | [99]  |
| Dongjiang River (Keeled mullet)                           | 130–610 (290/-) <sup>b</sup>      | 33.00 | 31.00 | 23.00 | 13.00 | -     | -     | -     | -     | -    | -    | [99]  |
| Dongjiang River (Tilapia)                                 | 53.0–130 (84.0/-) <sup>b</sup>    | 36.00 | 32.00 | 20.00 | 12.00 | -     | -     | -     | -     | -    | -    | [99]  |
| Guiyu (Chicken egg, 2 km from e-waste dismantling area)   | 2300–5500 (3400/3100)             | -     | -     | -     | -     | -     | -     | -     | -     | -    | -    | [101] |
| Guiyu (Chicken egg, 2.5 km from e-waste dismantling area) | 2600–6800 (4000/3400)             | -     | -     | -     | -     | -     | -     | -     | -     | -    | -    | [101] |
| Guiyu (Goose egg, 2 km from e-waste dismantling area)     | ND–150,000 (60,000/ND)            | -     | -     | -     | -     | -     | -     | -     | -     | -    | -    | [101] |
| Guiyu (Goose egg, 2.5 km from e-waste dismantling area)   | ND–11,000 (4600/1700)             | -     | -     | -     | -     | -     | -     | -     | -     | -    | -    | [101] |
| Qingyuan (Eggs, e-waste dismantling area, 2013)           | 477–26,200 (2680/926)             | 23.00 | 26.00 | 25.00 | 26.00 | 15.40 | 24.90 | 29.70 | 12.50 | 9.80 | 7.70 | [102] |
| Qingyuan (Eggs, e-waste dismantling area, 2016)           | 611–111,000 (10,100/1490)         | 36.00 | 33.00 | 19.00 | 12.00 | 20.00 | 31.50 | 24.70 | 12.10 | 7.70 | 4.00 | [102] |
| Qingyuan (Mrigal carp, e-waste dismantling area)          | 285,000–487,000 (408,000/416,000) | -     | -     | -     | -     | -     | -     | -     | -     | -    | -    | [24]  |
| Qingyuan (Yellow catfish, e-waste dismantling area)       | 94,300–148,000 (118,000/114,000)  | -     | -     | -     | -     | -     | -     | -     | -     | -    | -    | [24]  |
| Qingyuan (White amur bream, e-waste dismantling area)     | 113,000–163,000 (132,000/119,000) | -     | -     | -     | -     | -     | -     | -     | -     | -    | -    | [24]  |
| Qingyuan (Asian clam, e-waste dismantling area)           | 37,100–66,900 (49,800/45,500)     | -     | -     | -     | -     | -     | -     | -     | -     | -    | -    | [24]  |
| Qingyuan (River prawn, e-waste dismantling area)          | 76,500–118,000 (94,300/87,900)    | -     | -     | -     | -     | -     | -     | -     | -     | -    | -    | [24]  |
| Qingyuan (Pork, e-waste dismantling area)                 | 37,200–58,600                     | -     | -     | -     | -     | -     | -     | -     | -     | -    | -    | [24]  |

|                       |                                                     |                                      |       |       |       |       |       |       |       |       |       |      |       |
|-----------------------|-----------------------------------------------------|--------------------------------------|-------|-------|-------|-------|-------|-------|-------|-------|-------|------|-------|
| Northwestern<br>China |                                                     | (49,200/50,300)                      |       |       |       |       |       |       |       |       |       |      |       |
|                       | Qingyuan (Chicken, e-waste dismantling area)        | 25,300–84,200<br>(43,400/32,000)     | -     | -     | -     | -     | -     | -     | -     | -     | -     | -    | [24]  |
|                       | Qingyuan (Duck, e-waste dismantling area)           | 40,700–88,300<br>(66,100/67,700)     | -     | -     | -     | -     | -     | -     | -     | -     | -     | -    | [24]  |
|                       | Qingyuan (Chicken egg, e-waste dismantling area)    | 3370–6840 (4840/4940)                | -     | -     | -     | -     | -     | -     | -     | -     | -     | -    | [24]  |
|                       | Qingyuan (Duck egg, e-waste dismantling area)       | 1620–2910 (2040/1950)                | -     | -     | -     | -     | -     | -     | -     | -     | -     | -    | [24]  |
|                       | Qingyuan (Mustard, e-waste dismantling area)        | 132,000–167,000<br>(148,000/145,000) | -     | -     | -     | -     | -     | -     | -     | -     | -     | -    | [24]  |
|                       | Qingyuan (Lettuce, e-waste dismantling area)        | 493,000–541,000<br>(519,000/524,000) | -     | -     | -     | -     | -     | -     | -     | -     | -     | -    | [24]  |
|                       | Qingyuan (Sweet potato, e-waste dismantling area)   | 247,000–263,000<br>(256,000/258,000) | -     | -     | -     | -     | -     | -     | -     | -     | -     | -    | [24]  |
|                       | Qingyuan (Chinese radish, e-waste dismantling area) | 236,000–605,000<br>(402,000/394,000) | -     | -     | -     | -     | -     | -     | -     | -     | -     | -    | [24]  |
|                       | Qingyuan (Rice, e-waste dismantling area)           | 37,200–88,600<br>(62,800/67,400)     | -     | -     | -     | -     | -     | -     | -     | -     | -     | -    | [24]  |
|                       | Qingyuan (Peanut oil, e-waste dismantling area)     | 892–1320 (1100/1090)                 | -     | -     | -     | -     | -     | -     | -     | -     | -     | -    | [24]  |
|                       | Qingyuan (Well water, e-waste dismantling area)     | 54.2–80.4 (67.2/68.1) <sup>c</sup>   | -     | -     | -     | -     | -     | -     | -     | -     | -     | -    | [24]  |
|                       | Qingyuan (Tap water, e-waste dismantling area)      | 29.6–45.3 (37.2/39.0) <sup>c</sup>   | -     | -     | -     | -     | -     | -     | -     | -     | -     | -    | [24]  |
|                       | Qingyuan (Rice)                                     | -(63.0/-) <sup>b</sup>               | 18.80 | 31.40 | 30.20 | 19.60 | 7.60  | 21.10 | 44.60 | 18.60 | 5.60  | 2.40 | [103] |
|                       | Qingyuan (Wheat)                                    | -(110/-) <sup>b</sup>                | 18.50 | 30.80 | 27.30 | 23.40 | 3.30  | 14.20 | 40.10 | 25.60 | 13.20 | 3.60 | [103] |
|                       | Qingyuan (Bran)                                     | -(150/-) <sup>b</sup>                | 9.10  | 25.60 | 37.70 | 27.60 | 6.30  | 13.40 | 36.60 | 23.70 | 14.30 | 5.70 | [103] |
|                       | Qingyuan (Chicken muscle)                           | -(6200/-)                            | 19.90 | 25.60 | 29.10 | 25.50 | 10.64 | 19.56 | 34.20 | 20.32 | 10.75 | 4.54 | [103] |
|                       | Qingyuan (Chicken liver)                            | -(1100/-)                            | 19.90 | 23.50 | 28.70 | 27.80 | 13.18 | 19.62 | 29.90 | 19.70 | 12.15 | 5.45 | [103] |
|                       | Qingyuan (Chicken fat)                              | -(2400/-)                            | 15.60 | 21.10 | 32.70 | 30.60 | 6.35  | 11.59 | 28.00 | 28.16 | 18.23 | 7.67 | [103] |
|                       | Ningxia (Meat)                                      | -(139/-) <sup>a</sup>                | 69.76 | 25.13 | 3.53  | 1.58  | -     | -     | -     | -     | -     | -    | [94]  |
|                       | Ningxia (Aquatic foods)                             | -(238/-) <sup>a</sup>                | 65.86 | 24.16 | 5.12  | 4.87  | -     | -     | -     | -     | -     | -    | [95]  |
|                       | Ningxia (Cereals)                                   | -(98.5/-) <sup>a</sup>               | 69.88 | 16.84 | 7.40  | 5.88  | -     | -     | -     | -     | -     | -    | [96]  |

|                       |                         |                        |       |       |      |       |   |   |   |   |   |   |      |
|-----------------------|-------------------------|------------------------|-------|-------|------|-------|---|---|---|---|---|---|------|
| Southwestern<br>China | Ningxia (Legumes)       | -(165/-) <sup>a</sup>  | 84.14 | 9.99  | 2.24 | 3.63  | - | - | - | - | - | - | [96] |
|                       | Shanxi (Meat)           | -(121/-) <sup>a</sup>  | 80.08 | 17.59 | 1.83 | 0.50  | - | - | - | - | - | - | [94] |
|                       | Shanxi (Aquatic foods)  | -(2795/-) <sup>a</sup> | 70.98 | 22.79 | 4.44 | 1.79  | - | - | - | - | - | - | [95] |
|                       | Shanxi (Cereals)        | -(159/-) <sup>a</sup>  | 75.52 | 15.17 | 5.10 | 4.22  | - | - | - | - | - | - | [96] |
|                       | Shanxi (Legumes)        | -(224/-) <sup>a</sup>  | 90.34 | 8.14  | 0.76 | 0.76  | - | - | - | - | - | - | [96] |
|                       | Qinghai (Meat)          | -(107/-) <sup>a</sup>  | 76.64 | 20.37 | 1.59 | 1.40  | - | - | - | - | - | - | [94] |
|                       | Qinghai (Aquatic foods) | -(1172/-) <sup>a</sup> | 61.88 | 27.48 | 6.33 | 4.31  | - | - | - | - | - | - | [95] |
|                       | Qinghai (Cereals)       | -(315/-) <sup>a</sup>  | 74.26 | 15.77 | 5.81 | 4.16  | - | - | - | - | - | - | [96] |
|                       | Qinghai (Legumes)       | -(148/-) <sup>a</sup>  | 91.46 | 8.00  | 0.34 | 0.20  | - | - | - | - | - | - | [96] |
|                       | Sichuan (Meat)          | -(222/-) <sup>a</sup>  | 71.24 | 25.29 | 2.66 | 0.81  | - | - | - | - | - | - | [94] |
| China                 | Sichuan (Aquatic foods) | -(935/-) <sup>a</sup>  | 62.67 | 31.55 | 3.43 | 2.35  | - | - | - | - | - | - | [95] |
|                       | Sichuan (Cereals)       | -(521/-) <sup>a</sup>  | 24.55 | 11.43 | 8.59 | 55.43 | - | - | - | - | - | - | [96] |
|                       | Sichuan (Legumes)       | -(234/-) <sup>a</sup>  | 90.02 | 8.79  | 0.55 | 0.64  | - | - | - | - | - | - | [96] |

<sup>a</sup>wet weight (ww).

<sup>b</sup>dry weight (dw).

<sup>c</sup>ng/L.

-: data not available.

Table S14. Concentrations of SCCPs in human tissue.

| Sampling area                                | Sampling time | Sample                                                  | Concentration (ng/g lw)                                                                                                                                 | Reference |
|----------------------------------------------|---------------|---------------------------------------------------------|---------------------------------------------------------------------------------------------------------------------------------------------------------|-----------|
| Beijing                                      | 2007 and 2010 | Breast milk                                             | <20.0–54.0                                                                                                                                              | [105]     |
| Shijiazhuang                                 | 2014–2015     | Breast milk                                             | 210–16,120                                                                                                                                              | [106]     |
| Rural China                                  | 2007 and 2011 | Breast milk                                             | 68.0–1580 (2007); 65.6–2310 (2011)                                                                                                                      | [107]     |
| Shenzhen                                     | 2012          | Human blood                                             | 370–35,000                                                                                                                                              | [108]     |
| Urban China                                  | 2007 and 2011 | Mothers' milk                                           | 170–6150 (2007); 131–16,100 (2011)                                                                                                                      | [109]     |
| Henan province                               | 2016          | Human placenta                                          | 98.5–3771                                                                                                                                               | [110]     |
| Beijing                                      | 2013          | Maternal and cord serum                                 | 2570–57,800 (maternal serum); 3750–40,500 (cord serum)                                                                                                  | [111]     |
| Wuhan                                        | 2015–2016     | Maternal and cord serum; placenta                       | 15.9–584 (maternal serum) <sup>b</sup> ; 8.46–223 (cord serum) <sup>b</sup> ; 10.2–132 (placenta) <sup>a</sup>                                          | [112]     |
| Guangzhou                                    | 2018          | Human serum                                             | 1.00–5.45 <sup>b</sup>                                                                                                                                  | [113]     |
| Dalian                                       | 2015          | Human plasma                                            | <MDL–203 <sup>a</sup>                                                                                                                                   | [114]     |
| 3 cities in Yangtze River Delta <sup>c</sup> | 2010–2016     | Human milk                                              | <LOD–676                                                                                                                                                | [115]     |
| Mianyang                                     | 2018          | Maternal serum, placenta, cord serum<br>and breast milk | 51.0–620 (maternal serum) <sup>b</sup> ; 14.3–108 (placenta) <sup>a</sup> ; 13.3–242 (cord serum) <sup>b</sup> ;<br>29.2–271 (breast milk) <sup>b</sup> | [116]     |
| Jinan                                        | 2019          | Serum                                                   | 1670–42,700                                                                                                                                             | [117]     |

<sup>a</sup>wet weight (ww).<sup>b</sup>ng/mL.<sup>c</sup>Shanghai, Jiaxing and Shaoxing.

Table S15. Comparison of the concentrations (ng/g lw) and compositional profiles (%) of SCCPs in human tissue.

| Region             | Location                        | Range (mean/median)                | C <sub>10</sub> | C <sub>11</sub> | C <sub>12</sub> | C <sub>13</sub> | Cl <sub>5</sub> | Cl <sub>6</sub> | Cl <sub>7</sub> | Cl <sub>8</sub> | Cl <sub>9</sub> | Cl <sub>10</sub> | Reference |
|--------------------|---------------------------------|------------------------------------|-----------------|-----------------|-----------------|-----------------|-----------------|-----------------|-----------------|-----------------|-----------------|------------------|-----------|
| China              | Rural China (Breast milk, 2007) | 68.0–1580 (572/304)                | 51.00           | 28.00           | -               | -               | -               | -               | -               | -               | -               | -                | [107]     |
|                    | Rural China (Breast milk, 2010) | 65.6–2310 (607/360)                | 51.00           | 28.00           | -               | -               | -               | -               | -               | -               | -               | -                | [107]     |
|                    | Urban China (Breast milk, 2007) | 170–6150 (1300/681)                | 44.26           | 30.56           | 14.16           | 11.01           | -               | 31.00           | 43.00           | -               | -               | -                | [109]     |
|                    | Urban China (Breast milk, 2011) | 131–16,100 (2280/733)              | 46.05           | 34.34           | 12.63           | 6.97            | -               | 31.00           | 43.00           | -               | -               | -                | [109]     |
| Northeastern China | Dalian (Human plasma)           | ND–203 (32.0/26.4) <sup>a</sup>    | 41.20           | 30.90           | 14.10           | 13.80           | 11.90           | 32.40           | 35.30           | 14.20           | 5.20            | 1.00             | [114]     |
| Northern China     | Beijing (Breast milk)           | <20.0–54.0 (-/<20.0)               | 14.29           | 19.05           | 28.57           | 38.10           | 45.38           | 21.61           | 18.15           | 9.77            | 5.10            | 0.00             | [105]     |
|                    | Beijing (Maternal serum)        | 2570–57,800 (18,105/16,100)        | 77.3–85.6       | -               | -               | -               | -               | 37.1–45.5       | 28.9–34.8       | -               | -               | -                | [111]     |
|                    | Beijing (Cord serum)            | 3750–40,500 (11,546/8830)          | 77.3–85.6       | -               | -               | -               | -               | 37.1–45.5       | 28.9–34.8       | -               | -               | -                | [111]     |
|                    | Shijiazhuang (Breast milk)      | 210–16,120 (2510/1460)             | 29.10           | 28.80           | 34.90           | 7.20            | -               | 39.10           | 27.60           | 33.30           | 0.00            | 0.00             | [106]     |
| Eastern China      | Shanghai (Breast milk)          | 14.8–676 (161/35.0)                | -               | -               | -               | -               | -               | -               | -               | -               | -               | -                | [115]     |
|                    | Jiaxing (Breast milk)           | ND–642 (191/28.6)                  | -               | -               | -               | -               | -               | -               | -               | -               | -               | -                | [115]     |
|                    | Shaoxing (Breast milk)          | ND–124 (51.7/37.9)                 | -               | -               | -               | -               | -               | -               | -               | -               | -               | -                | [115]     |
|                    | Jinan (Human serum)             | 1670–42,700 (-/13,800)             | 22.20           | 19.90           | 18.40           | 39.40           | -               | -               | 36.90           | 27.80           | -               | -                | [117]     |
| Central China      | Henan province (Human placenta) | 98.5–3771 (593/379)                | 58.70           | 35.59           | 2.04            | 3.67            | 0.74            | 38.99           | 52.21           | 5.82            | 0.74            | 1.50             | [110]     |
|                    | Wuhan (Maternal serum)          | 15.9–584 (103/66.2) <sup>b</sup>   | 33.91           | 26.16           | 17.73           | 22.19           | 21.26           | 23.07           | 22.58           | 15.59           | 11.21           | 6.30             | [112]     |
|                    | Wuhan (Cord serum)              | 8.46–223 (49.9/36.7) <sup>b</sup>  | 37.44           | 30.83           | 13.17           | 18.56           | 27.02           | 27.19           | 22.49           | 10.49           | 7.84            | 4.97             | [112]     |
|                    | Wuhan (Placenta)                | 10.2–132 (42.4/33.1) <sup>a</sup>  | 33.95           | 27.82           | 17.99           | 20.25           | 25.97           | 30.04           | 21.05           | 12.17           | 6.74            | 4.04             | [112]     |
| Southern China     | Shenzhen (Human blood)          | 370–35,000 (-/3500)                | 7.00            | 16.00           | 17.00           | 59.00           | -               | 17.85           | 36.26           | 29.07           | 14.20           | 2.62             | [108]     |
|                    | Guangzhou (Human serum)         | 1.00–5.45 (2.28/1.73) <sup>b</sup> | 0.47            | 21.10           | 13.50           | 64.50           | -               | 0.40            | 20.30           | 39.20           | 27.90           | 10.00            | [113]     |
| Southwestern China | Mianyang (Maternal serum)       | 51.0–620 (202/117) <sup>b</sup>    | 36.35           | 37.05           | 12.28           | 14.31           | 48.74           | 23.33           | 15.70           | 8.22            | 2.67            | 1.34             | [116]     |
|                    | Mianyang (Placenta)             | 14.3–108 (41.8/30.3) <sup>a</sup>  | 37.32           | 35.41           | 13.64           | 13.64           | 36.12           | 30.14           | 20.57           | 9.33            | 2.63            | 1.20             | [116]     |
|                    | Mianyang (Cord serum)           | 13.3–242 (88.0/70.0) <sup>b</sup>  | 37.84           | 34.77           | 12.39           | 15.00           | 44.71           | 27.87           | 16.61           | 8.19            | 1.71            | 0.91             | [116]     |
|                    | Mianyang (Breast milk)          | 29.2–271 (117/82.6) <sup>b</sup>   | 35.73           | 34.53           | 13.16           | 16.58           | 45.56           | 24.23           | 17.32           | 9.04            | 2.39            | 1.45             | [116]     |

<sup>a</sup>wet weight (ww).<sup>b</sup>ng/mL.



Table S16. Estimated daily intake (EDI) of SCCPs via various exposure routes.

| Exposure pathway              | Region             | Location            | Year | Medium                               | Population                 | EDI (ng/kg bw/day) |                 | Reference |
|-------------------------------|--------------------|---------------------|------|--------------------------------------|----------------------------|--------------------|-----------------|-----------|
|                               |                    |                     |      |                                      |                            | Mean               | 95th percentile |           |
| Inhalation exposure           | Northeastern China | Dalian              | 2010 | Outdoor air                          | Adults                     | 8.65               | 19.0            | [3]       |
|                               |                    | Dalian              | 2010 | Outdoor air                          | Children                   | 15.7               | 34.6            | [3]       |
|                               |                    | Dalian              | 2016 | Outdoor air                          | Adults                     | 22.3               | -               | [3]       |
|                               |                    | Dalian              | 2016 | Outdoor air                          | Children                   | 39.6               | -               | [3]       |
|                               | Northern China     | Beijing             | 2016 | Indoor air                           | Adults                     | 20.6               | -               | [8]       |
|                               |                    | Beijing             | 2016 | Indoor air                           | Children                   | 51.7               | -               | [8]       |
|                               | Eastern China      | Jinan               | 2016 | Outdoor air                          | Adults                     | 175                | 199             | [10]      |
|                               | Southern China     | PRD                 | 2017 | Indoor and outdoor PM <sub>2.5</sub> | Male                       | 2.66               | 7.23            | [16]      |
|                               |                    | PRD                 | 2017 | Indoor and outdoor PM <sub>2.5</sub> | Female                     | 2.85               | 7.72            | [16]      |
|                               |                    | Guangzhou           | 2017 | Indoor PM                            | Adults                     | 1.81               | 3.72            | [13]      |
|                               | Emission Region    | CP production plant | 2016 | Indoor air <sup>a</sup>              | Industrial employees       | 270                | -               | [11]      |
|                               |                    | CP production plant | 2016 | Indoor air <sup>b</sup>              | Industrial employees       | 10.0               | -               | [11]      |
|                               |                    | CP production plant | 2016 | Outdoor air <sup>c</sup>             | Local residents (adults)   | 94.0               | -               | [11]      |
|                               |                    | CP production plant | 2016 | Outdoor air <sup>c</sup>             | Local residents (children) | 253                | -               | [11]      |
|                               |                    | CP production plant | 2016 | Outdoor air <sup>d</sup>             | Local residents (adults)   | 11.7               | -               | [11]      |
|                               |                    | CP production plant | 2016 | Outdoor air <sup>d</sup>             | Local residents (children) | 39.7               | -               | [11]      |
| Ingestion and dermal exposure | Northeastern China | Harbin              | 2013 | Indoor dust                          | Infants                    | 198                | 540             | [21]      |
|                               |                    | Harbin              | 2013 | Indoor dust                          | Toddlers                   | 266                | 727             | [21]      |
|                               |                    | Harbin              | 2013 | Indoor dust                          | Children                   | 83.0               | 226             | [21]      |
|                               |                    | Harbin              | 2013 | Indoor dust                          | Teenagers                  | 53.0               | 144             | [21]      |
|                               |                    | Harbin              | 2013 | Indoor dust                          | Adults                     | 45.0               | 122             | [21]      |
|                               |                    | Dalian              | 2015 | Indoor dust <sup>e</sup>             | Adults                     | 212                | 609             | [22]      |
|                               |                    | Dalian              | 2015 | Indoor dust <sup>e</sup>             | Toddlers                   | 602                | 3249            | [22]      |
|                               |                    | Dalian              | 2015 | Indoor dust <sup>f</sup>             | Adults                     | 74.0               | 252             | [22]      |
|                               |                    | Dalian              | 2015 | Indoor dust <sup>f</sup>             | Toddlers                   | 210                | 1345            | [22]      |

|                  |                 |                          |           |                        |                            |        |        |       |
|------------------|-----------------|--------------------------|-----------|------------------------|----------------------------|--------|--------|-------|
| Dietary exposure | Northern China  | Beijing                  | 2016      | Indoor dust            | Adults                     | 179    | 1159   | [8]   |
|                  |                 | Beijing                  | 2016      | Indoor dust            | Children                   | 1519   | 4324   | [8]   |
|                  | Emission Region | E-waste dismantling area | 2017      | Indoor dust            | Occupational workers       | 4640   | 20,400 | [24]  |
|                  |                 | E-waste dismantling area | 2017      | Indoor dust            | Local residents (adults)   | 600    | 2280   | [24]  |
|                  |                 | E-waste dismantling area | 2017      | Indoor dust            | Local residents (children) | 4130   | 15,800 | [24]  |
|                  | China           | 20 provinces             | 2011      | Meat and meat products | Adults                     | 130    | 560    | [94]  |
|                  |                 | 18 provinces             | 2017      | Aquatic foods          | Adults                     | 872    | -      | [95]  |
|                  |                 | 19 provinces             | 2011      | Cereals                | Adults                     | 5185   | -      | [96]  |
|                  |                 | 19 provinces             | 2011      | Legumes                | Adults                     | 529    | -      | [96]  |
|                  |                 | 5 provinces              | 2018      | Milk                   | Adults                     | 29.7   | -      | [98]  |
|                  | Northern China  | Beijing                  | 2007      | Diet                   | Adults                     | 660    | 1200   | [87]  |
|                  |                 | Beijing                  | 2014-2016 | Diet                   | Male adults                | 221    | 747    | [89]  |
|                  |                 | Beijing                  | 2014-2016 | Diet                   | Female adults              | 227    | 725    | [89]  |
|                  |                 | Beijing                  | 2014-2016 | Cooked food            | Adults                     | 145    | -      | [89]  |
|                  | Eastern China   | Jinan                    | 2019      | Vegetables             | Adults                     | 97.0   | 145    | [92]  |
|                  |                 | Jinan                    | 2019      | Fruit                  | Adults                     | 36.9   | 52.9   | [92]  |
|                  |                 | Jinan                    | 2019      | Grains                 | Adults                     | 1390   | 1749   | [92]  |
|                  |                 | Jinan                    | 2019      | Meat                   | Adults                     | 155    | 237    | [92]  |
|                  |                 | Jinan                    | 2019      | Seafood                | Adults                     | 35.3   | 48.4   | [92]  |
|                  |                 | Shanghai                 | 2011      | Farmed freshwater fish | Adults                     | 49.0   | -      | [99]  |
|                  |                 | Shanghai                 | 2011      | Sea fish               | Adults                     | 32.0   | -      | [99]  |
|                  | Southern China  | Guangdong                | 2011      | River fish             | Adults                     | 47.0   | -      | [99]  |
|                  | Emission Region | E-waste dismantling area | 2013      | Eggs                   | Adults                     | 65.4   | -      | [102] |
|                  |                 | E-waste dismantling area | 2013      | Eggs                   | Children                   | 281    | -      | [102] |
|                  |                 | E-waste dismantling area | 2016      | Eggs                   | Adults                     | 274    | -      | [102] |
|                  |                 | E-waste dismantling area | 2016      | Eggs                   | Children                   | 1180   | -      | [102] |
|                  |                 | E-waste dismantling area | 2017      | Diet                   | Occupational workers       | 15,400 | 20,300 | [24]  |
|                  |                 | E-waste dismantling area | 2017      | Diet                   | Local residents (adults)   | 15,400 | 20,300 | [24]  |

|                      |                    |                          |           |             |                            |        |        |       |
|----------------------|--------------------|--------------------------|-----------|-------------|----------------------------|--------|--------|-------|
| Lactational exposure | Rural China        | E-waste dismantling area | 2017      | Diet        | Local residents (children) | 34,100 | 46,400 | [24]  |
|                      |                    | 8 provinces              | 2007      | Breast milk | Infants                    | 1310   | 6320   | [107] |
|                      |                    | 16 provinces             | 2011      | Breast milk | Infants                    | 1520   | 8650   | [107] |
|                      | Northern China     | Beijing                  | 2007–2009 | Breast milk | Infants                    | 337    | -      | [105] |
|                      |                    | Shijiazhuang             | 2014–2015 | Breast milk | Infants (1 month)          | 13,000 | 18,700 | [106] |
|                      |                    | Shijiazhuang             | 2014–2015 | Breast milk | Infants (3 month)          | 7100   | 9600   | [106] |
|                      |                    | Shijiazhuang             | 2014–2015 | Breast milk | Infants (6 month)          | 2500   | 3500   | [106] |
|                      | Eastern China      | YRD                      | 2015–2016 | Breast milk | Infants                    | 166    | 2580   | [115] |
|                      | Southwestern China | Mianyang                 | 2018      | Breast milk | Neonates                   | 17,400 | -      | [116] |

<sup>a</sup>production hall.

<sup>b</sup>office area.

<sup>c</sup>farmland.

<sup>d</sup>village.

<sup>e</sup>shopping mall.

<sup>f</sup>building material mall.

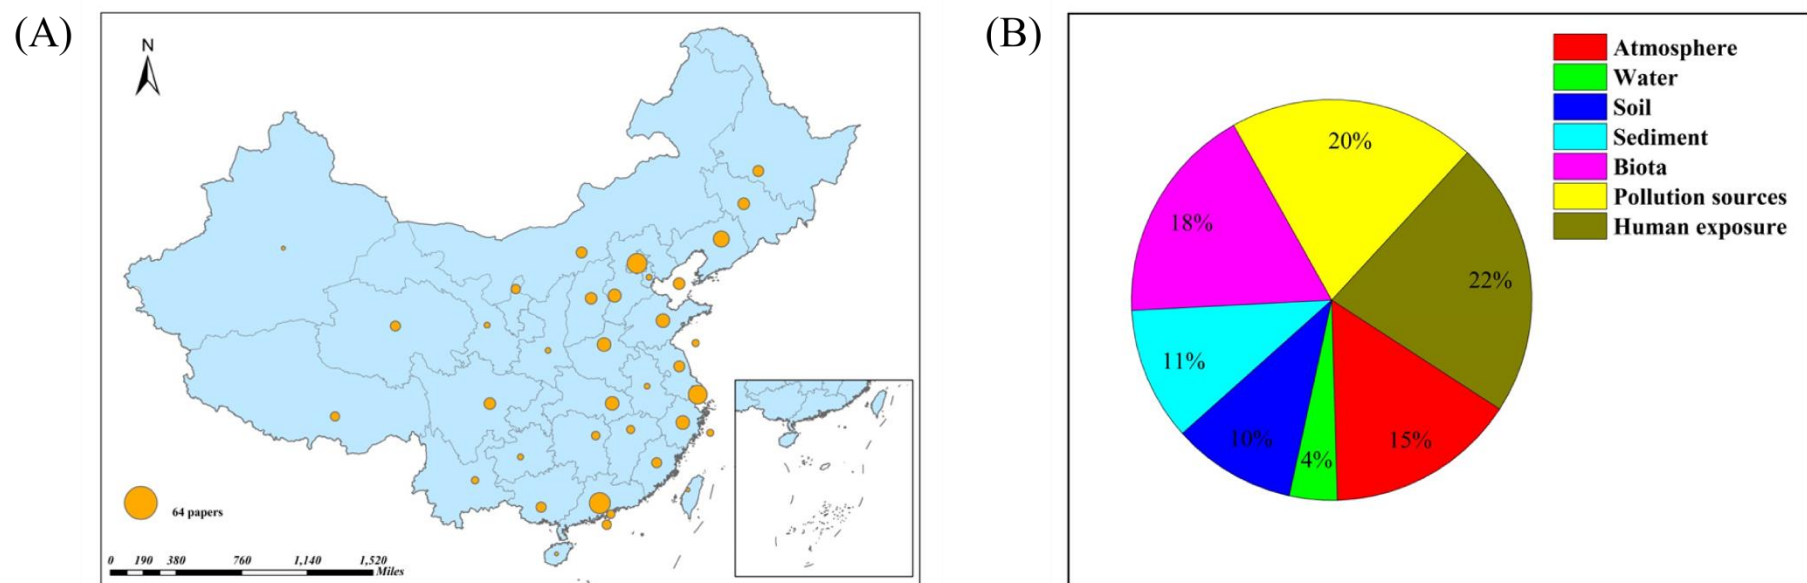

Figure S1. Regional distribution (A) and domain proportion (B) of SCCP research in China over the past decade.

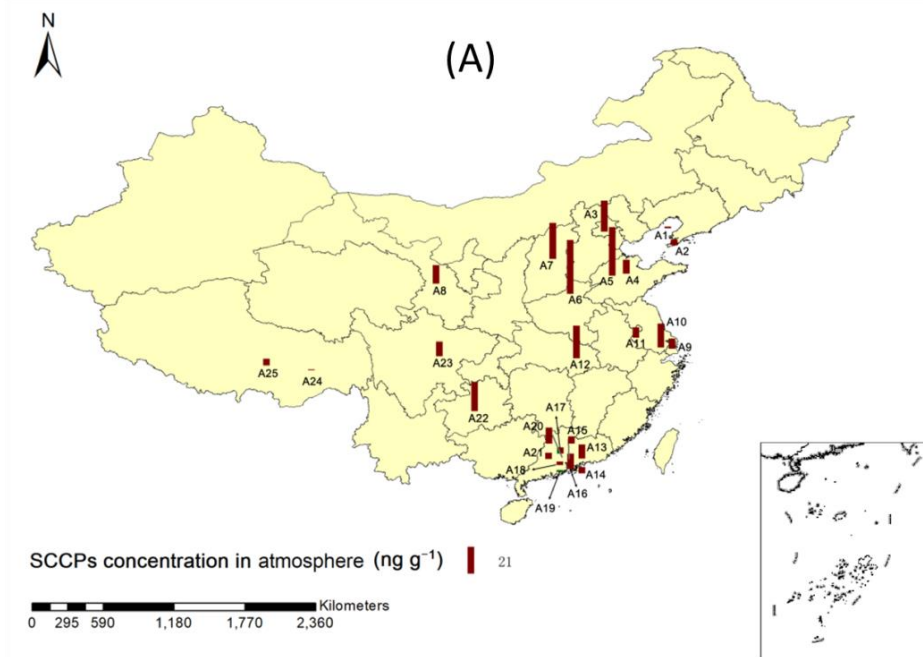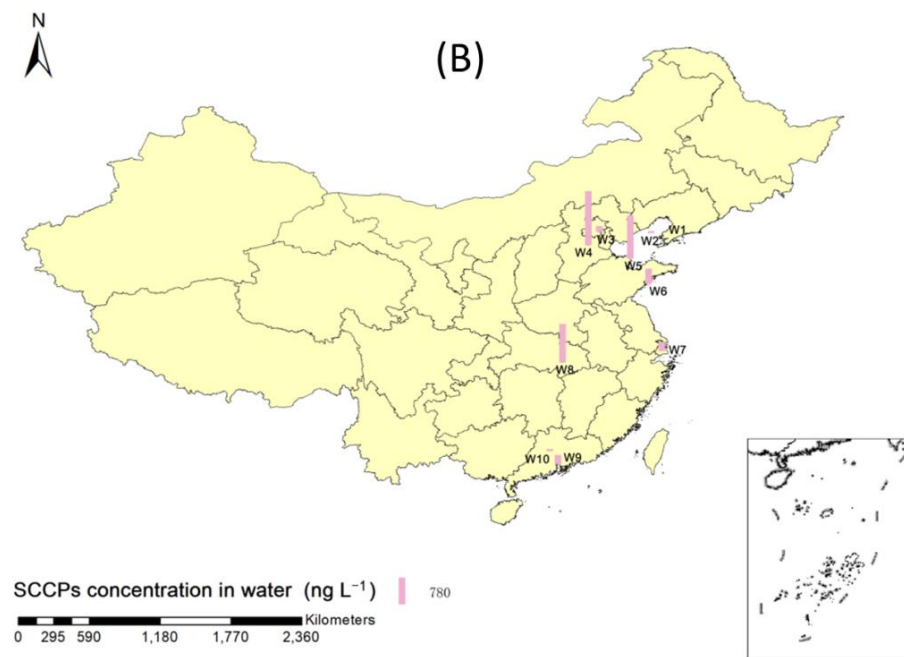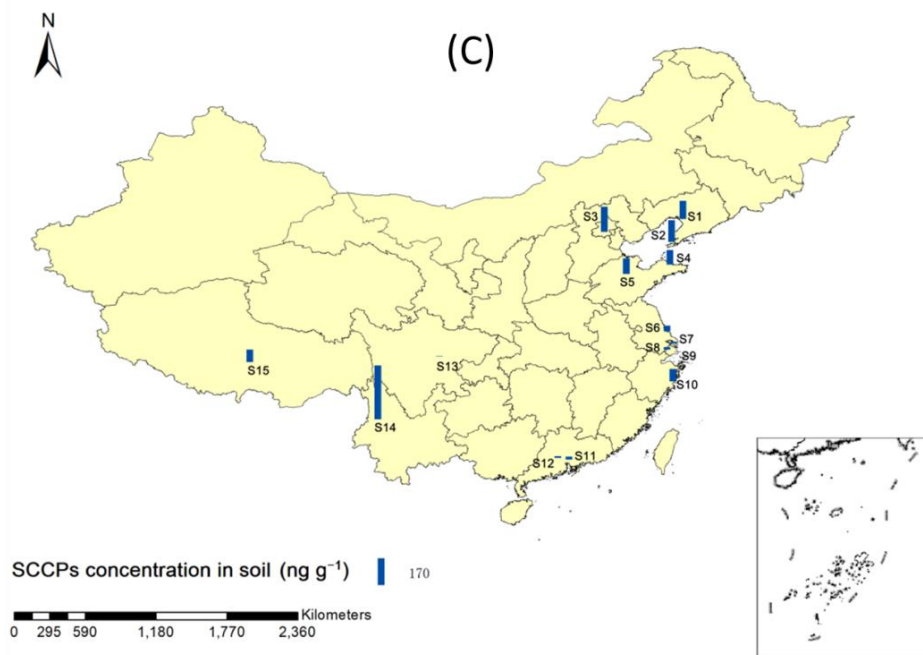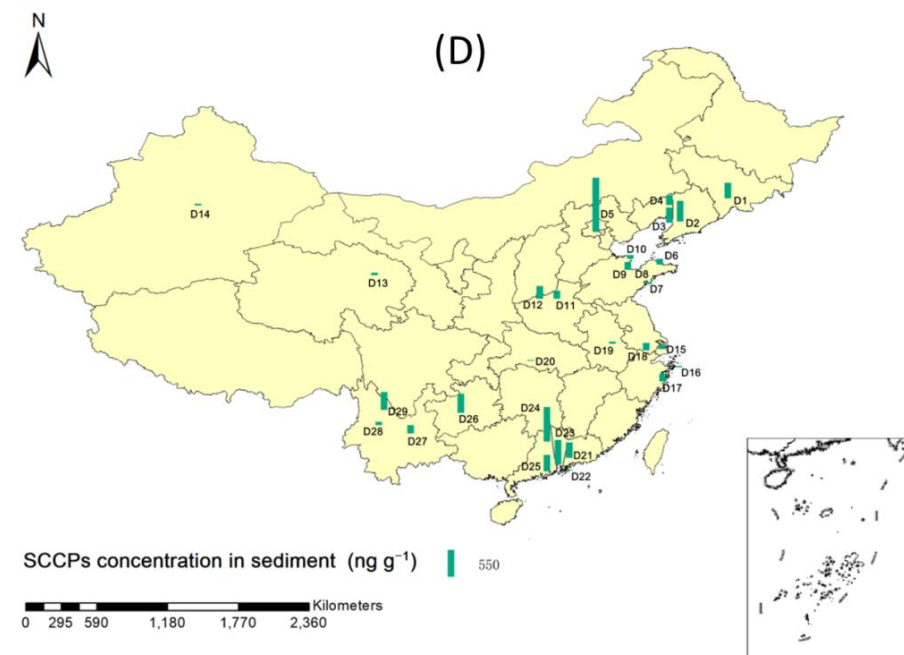

Figure S2. Concentrations of SCCPs (mean value) in environmental matrices in China. (A) The concentrations of SCCPs in atmosphere (A1: Bohai Sea; A2: Dalian; A3: Beijing; A4: Zibo; A5: Jinan; A6: Xinxiang; A7: Taiyuan; A8: Lanzhou; A9: Shanghai; A10: Suzhou; A11: Nanjing; A12: Wuhan; A13: Huizhou; A14: Shenzhen; A15: Dongguan; A16: Zhuhai; A17: Foshan; A18: Jiangmen; A19: Zhongshan; A20: Guangzhou; A21: Zhaoqing; A22: Guiyang; A23: Chengdu; A24: Shergyla Mountain; A25: Lhasa). The data in Dalian, Bohai Sea and Zibo were the SCCPs concentrations in PM; the data in Suzhou was the SCCPs concentration in gas phase; the data in Lhasa, Shergyla Mountain and Shenzhen were the sum of SCCPs concentrations in the gas and particle phases; the data in the remaining cities were the SCCPs concentrations in PM<sub>2.5</sub>. (B) The concentrations of SCCPs in water (W1: Liaodong Bay; W2: Bohai Sea; W3: Gaobeidian Lake; W4: Baiyangdian Lake; W5: Yellow River Estuary; W6: Yellow Sea; W7: Shanghai; W8: Middle reaches of Yangtze River; W9: Pearl River Estuary; W10: Qingyuan). (C) The concentrations of SCCPs in soil (S1: Liaohe River Basin; S2: Dalian; S3: Beijing; S4: Shandong Peninsula; S5: Zibo; S6: Nantong; S7: Chongming Island; S8: Shanghai (urban); S9: Shanghai (suburban); S10: Taizhou; S11: Pearl River Delta; S12: Guangzhou; S13: Chengdu; S14: Yunnan; S15: Tibetan Plateau). (D) The concentrations of SCCPs in sediment (D1: Lake Sihailongwan maar; D2: Liaohe Estuary; D3: Liaodong Bay; D4: Liaohe River Basin; D5: Gaobeidian Lake; D6: Shandong Peninsula; D7: Yellow Sea; D8: Laizhou Bay (marine sediment); D9: Laizhou Bay (river sediment); D10: Bohai Sea; D11: Middle reaches of Yellow River; D12: Henan section of Yellow River; D13: Lake Qinghai; D14: Lake Bosten; D15: Shanghai; D16: East China Sea; D17: Taizhou; D18: Lake Taihu; D19: Lake Chaohu; D20: Middle reaches of Yangtze River; D21: Shenzhen; D22: Hong Kong; D23: Pearl River Estuary; D24: Pearl River Delta (river sediment); D25: Pearl River Delta (marine sediment); D26: Lake Hongfeng; D27: Lake Dianchi; D28: Lake Erhai; D29: Lake Chenghai).

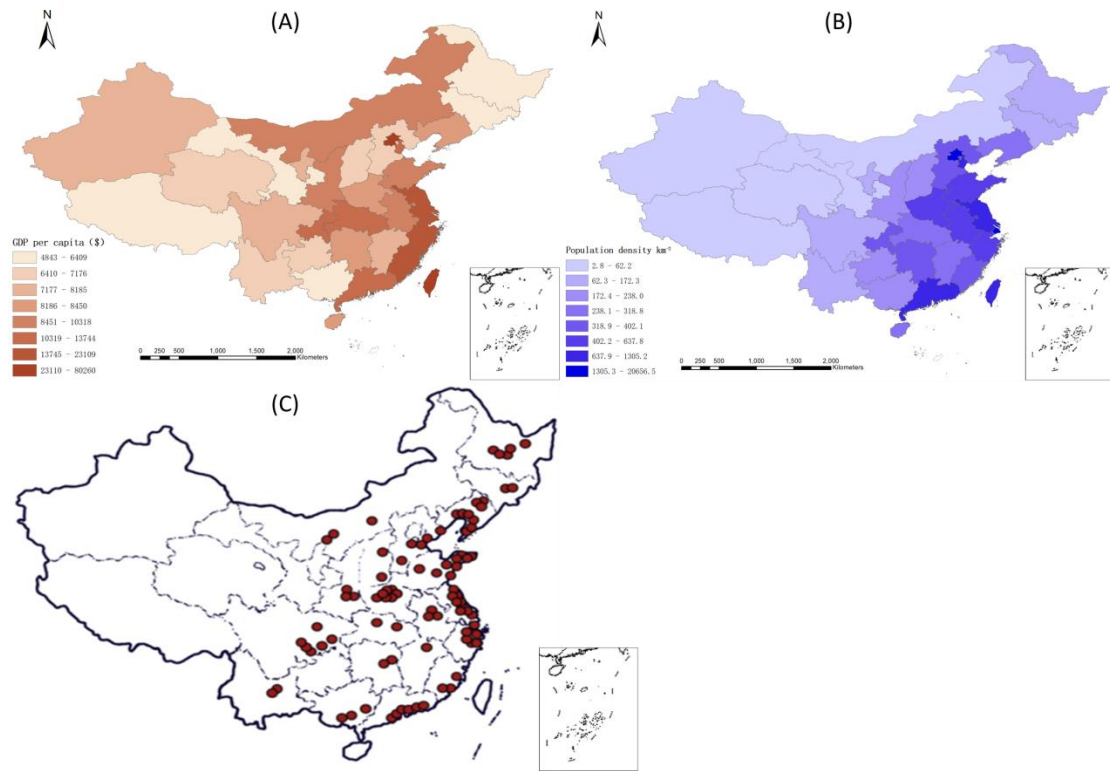

Figure S3. GDP per capita (A), population density (B) and distribution of CP manufacturing plants (C) in China [118].

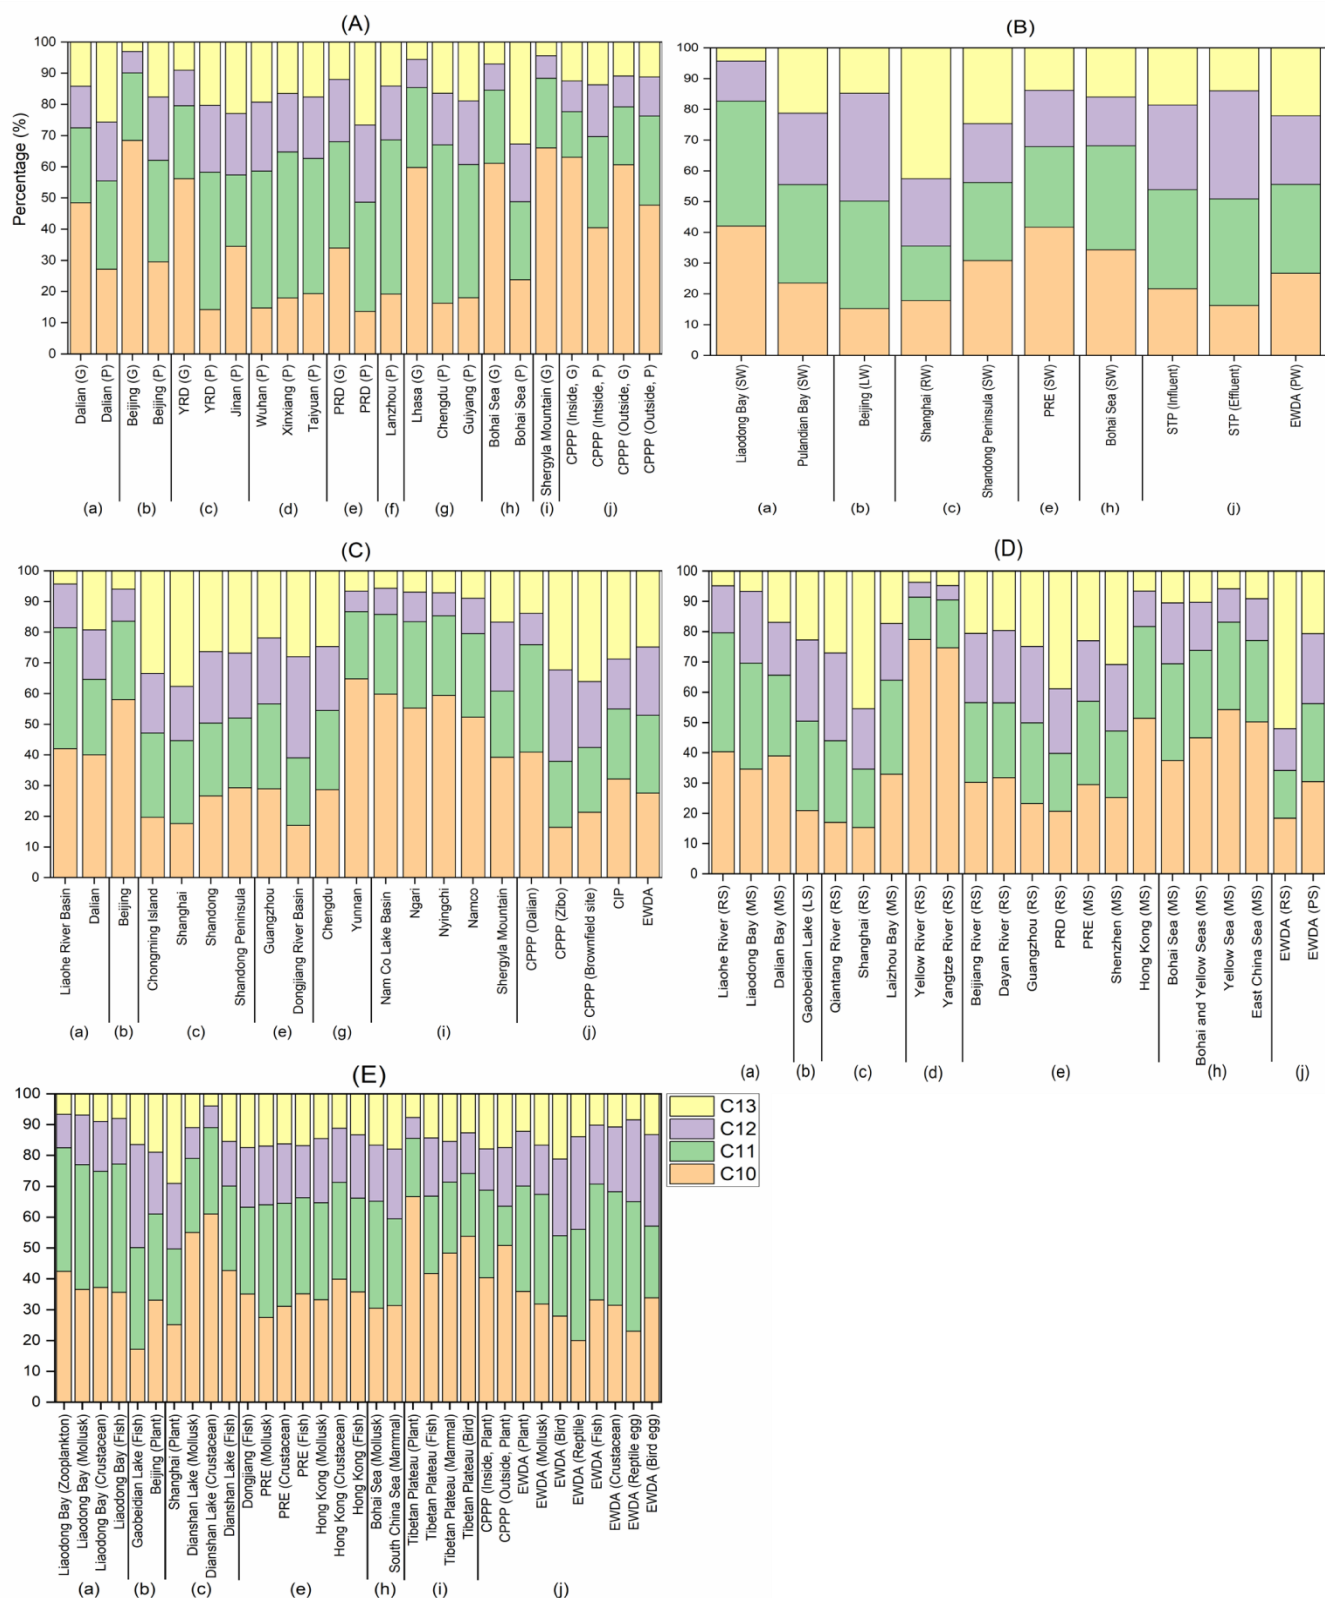

Figure S4. Carbon composition profiles of SCCP congeners in different environmental matrices in China. (A) The congener composition of SCCPs in air. (B) The congener composition of SCCPs in water. (C) The congener composition of SCCPs in soil. (D) The congener composition of SCCPs in sediment. (E) The congener composition of SCCPs in biota. (a), (b), (c), (d), (e), (f), (g), (h), (i) and (j) represent Northeastern China, Northern China, Eastern China, Central China, Southern China, Northwestern China, Southwestern China, China sea areas, Background area and Emission region, respectively. G: gas phase; P: particle phase; SW: seawater; LW: lake water; RW: river water; PW: pond water; RS: river sediment; MS: marine sediment; LS: lake sediment; PS: pond sediment; YRD: Yangtze River Delta; PRD: Pearl River Delta; CPPP: CP production plant; PRE: Pearl River Estuary; STP: sewage treatment plant; EWDA: e-waste dismantling area; CIP: chemical industrial park.



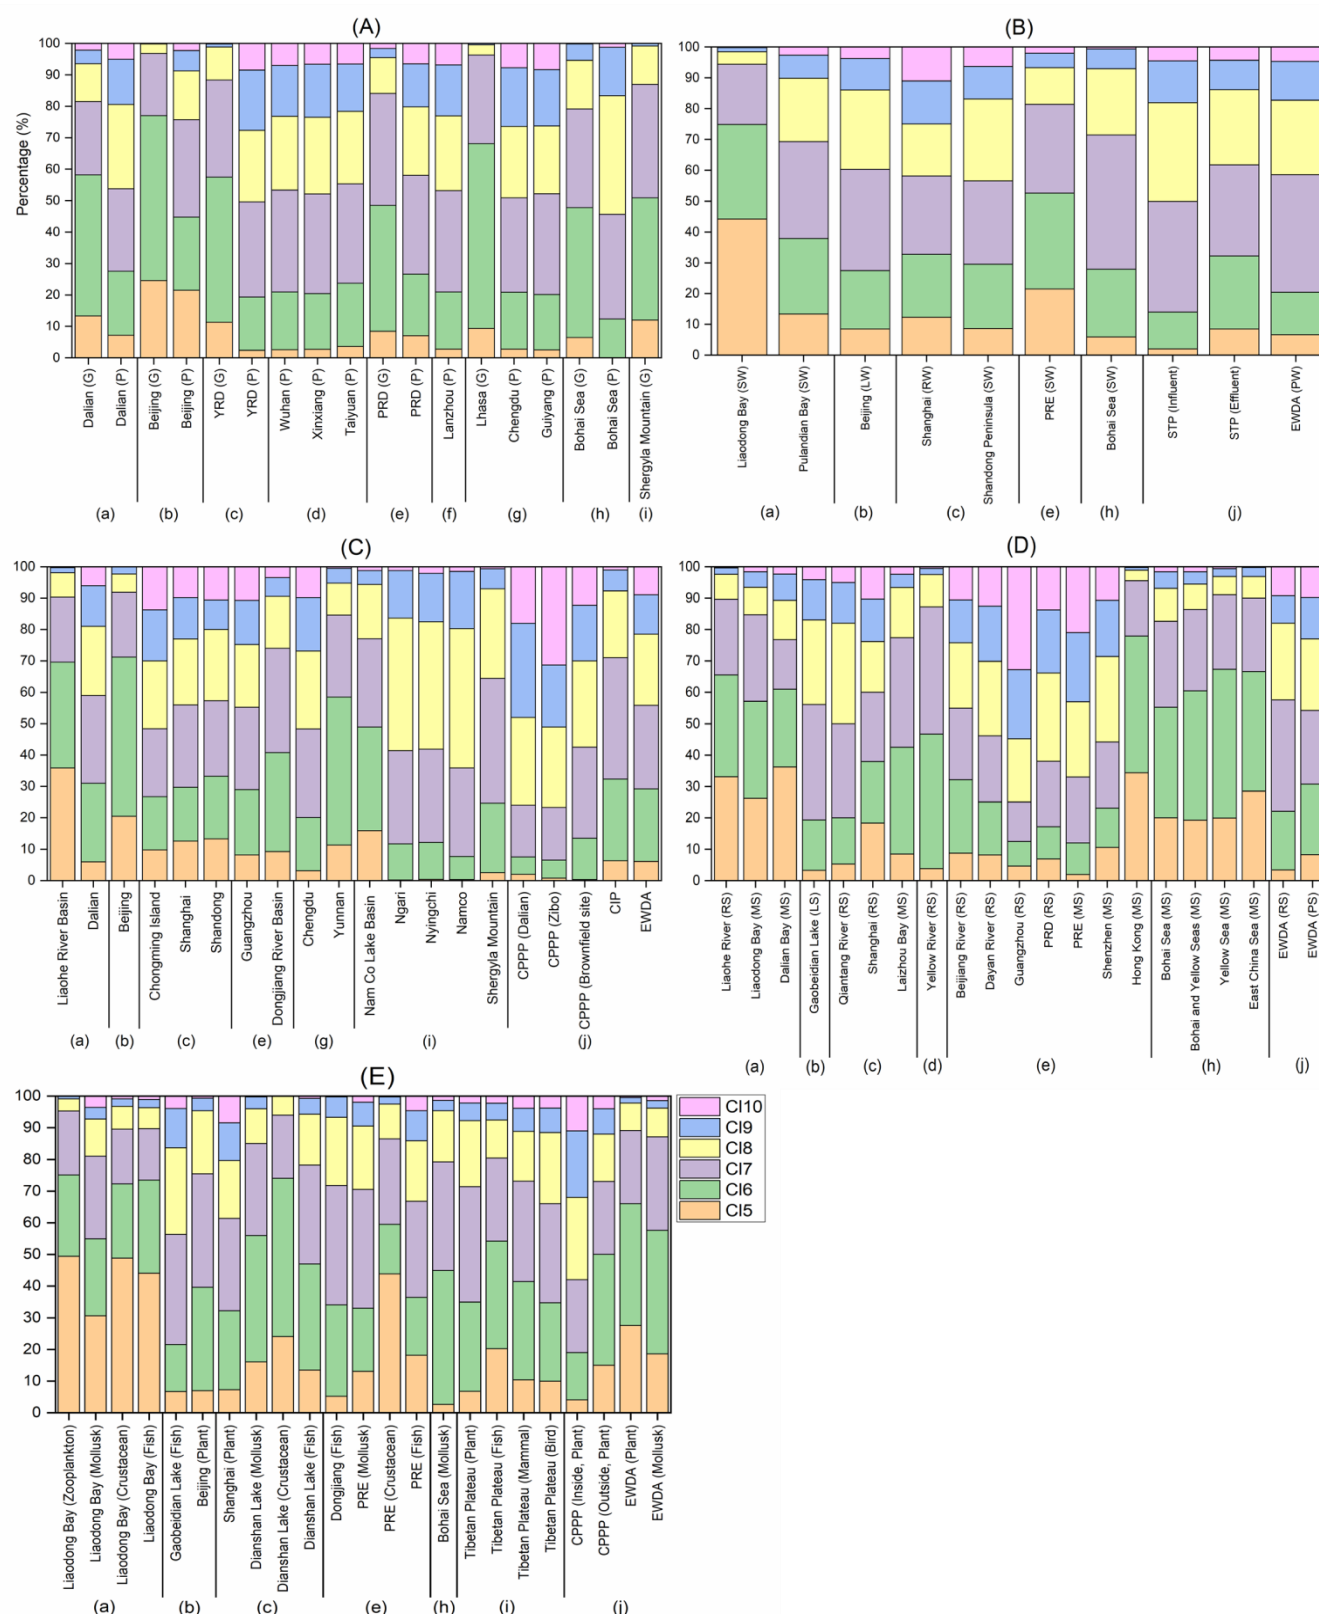

Figure S5. Chlorine composition profiles of SCCP congeners in different environmental matrices in China. (A) The chlorine abundance of SCCP congeners in air. (B) The chlorine abundance of SCCP congeners in water. (C) The chlorine abundance of SCCP congeners in soil. (D) The chlorine abundance of SCCP congeners in sediment. (E) The chlorine abundance of SCCP congeners in biota. (a), (b), (c), (d), (e), (f), (g), (h), (i) and (j) represent Northeastern China, Northern China, Eastern China, Central China, Southern China, Northwestern China, Southwestern China, China sea areas, Background area and Emission region, respectively. G: gas phase; P: particle phase; SW: seawater; LW: lake water; RW: river water; PW: pond water; RS: river sediment; MS: marine sediment; LS: lake sediment; PS: pond sediment; YRD: Yangtze River Delta; PRD: Pearl River Delta; CPPP: CP production plant; PRE: Pearl River Estuary; STP: sewage treatment plant; EWDA: e-waste dismantling area; CIP: chemical industrial park.

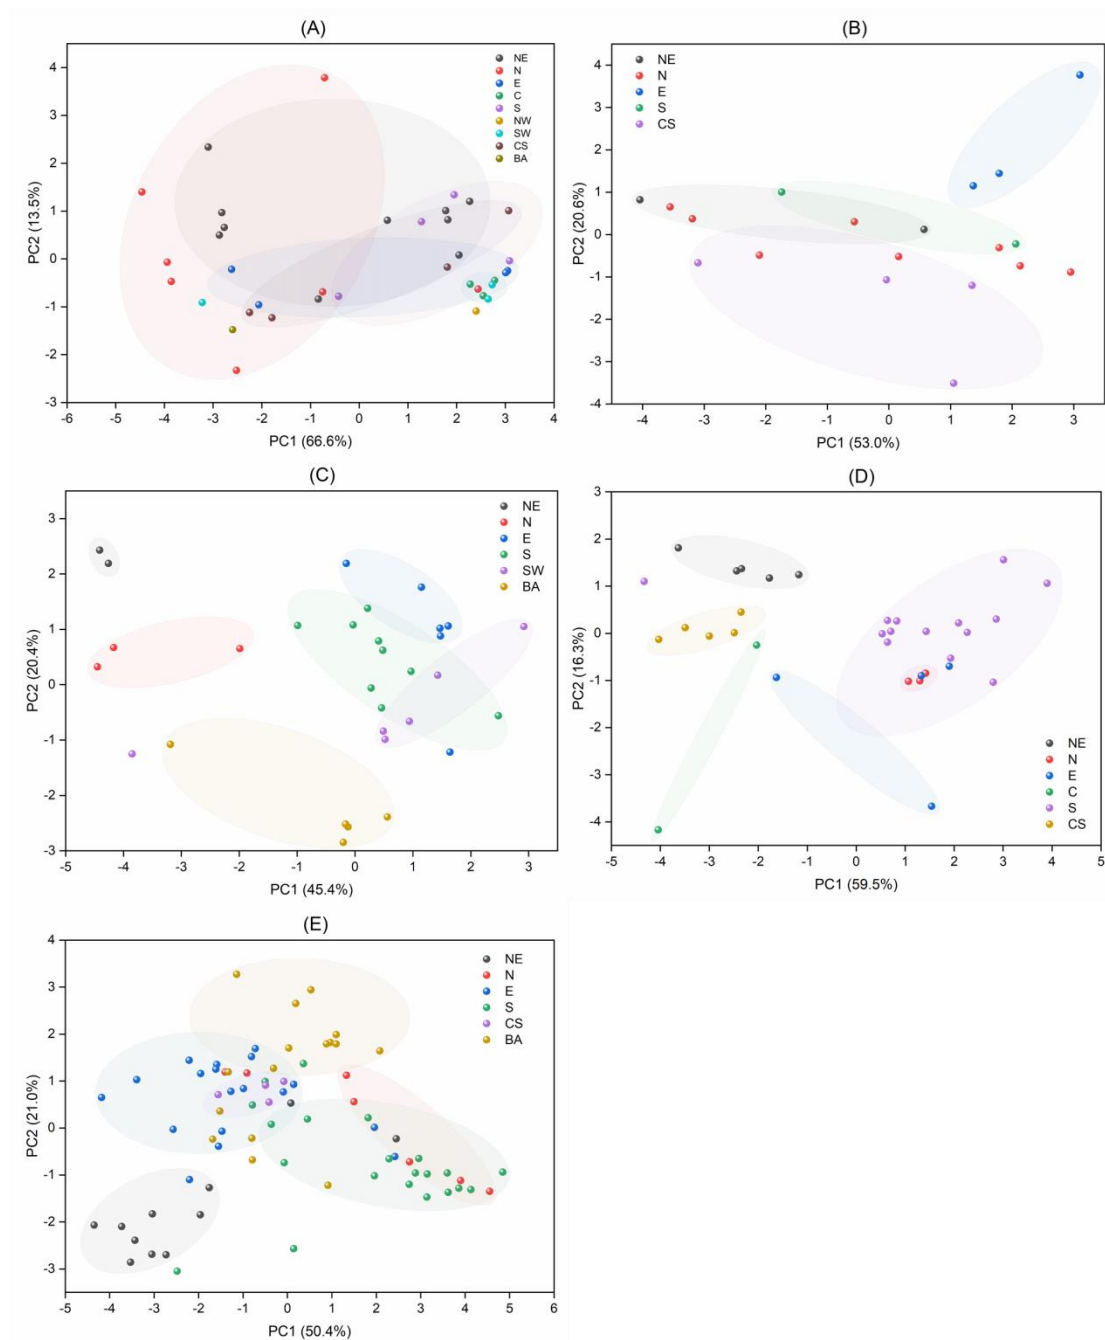

Figure S6. PCA of SCCP congeners in different regions of China. (A) PCA of SCCP congeners in air. (B) PCA of SCCP congeners in water. (C) PCA of SCCP congeners in soil. (D) PCA of SCCP congeners in sediment. (E) PCA of SCCP congeners in biota. NE: Northeastern China; N: Northern China; E: Eastern China; C: Central China; S: Southern China; NW: Northwestern China; SW: Southwestern China; CS: China sea areas; BA: Background area.

## Reference

1. Li, Q.; Li, J.; Wang, Y.; Xu, Y.; Pan, X.; Zhang, G.; Luo, C.; Kobara, Y.; Nam, J.-J.; Jones, K. C., Atmospheric Short-Chain Chlorinated Paraffins in China, Japan, and South Korea. *Environ. Sci. Technol.* **2012**, 46, (21), 11948-11954.
2. Liu, D.; Li, Q.; Cheng, Z.; Li, K.; Li, J.; Zhang, G., Spatiotemporal variations of chlorinated paraffins in PM<sub>2.5</sub> from Chinese cities: Implication of the shifting and upgrading of its industries. *Environ. Pollut.* **2020**, 259, 113853.
3. Zhu, X.; Bai, H.; Gao, Y.; Chen, J.; Yuan, H.; Wang, L.; Wang, W.; Dong, X.; Li, X., Concentrations and inhalation risk assessment of short-chain polychlorinated paraffins in the urban air of Dalian, China. *Environ. Sci. Pollut. Res.* **2017**, 24, (26), 21203-21212.
4. Bai, H.; Zhu, X.; Gao, Y.; Chen, J.; Wang, L.; Yuan, H.; Li, X.; Wang, W.; Dong, X., Gas-particle partitioning behavior of short-chain chlorinated paraffins in urban air of Dalian. *Journal of Dalian Jiaotong University* **2017**, 38, (6), 78-84 (in Chinese).
5. Wang, Y.; Zhu, X.; Gao, Y.; Bai, H.; Wang, P.; Chen, J.; Yuan, H.; Wang, L.; Li, X.; Wang, W., Monitoring gas- and particulate-phase short-chain polychlorinated paraffins in the urban air of Dalian by a self-developed passive sampler. *Journal of Environmental Sciences* **2019**, 80, 287-295.
6. Wang, T.; Han, S.; Yuan, B.; Zeng, L.; Li, Y.; Wang, Y.; Jiang, G., Summer-winter concentrations and gas-particle partitioning of short chain chlorinated paraffins in the atmosphere of an urban setting. *Environ. Pollut.* **2012**, 171, 38-45.
7. Gao, W.; Wu, J.; Wang, Y.; Jiang, G., Distribution and congener profiles of short-chain chlorinated paraffins in indoor/outdoor glass window surface films and their film-air partitioning in Beijing, China. *Chemosphere* **2016**, 144, 1327-1333.
8. Gao, W.; Cao, D.; Wang, Y.; Wu, J.; Wang, Y.; Wang, Y.; Jiang, G., External Exposure to Short- and Medium-Chain Chlorinated Paraffins for the General Population in Beijing, China. *Environ. Sci. Technol.* **2018**, 52, (1), 32-39.
9. Huang, H.; Gao, L.; Xia, D.; Qiao, L.; Wang, R.; Su, G.; Liu, W.; Liu, G.; Zheng, M., Characterization of short- and medium-chain chlorinated paraffins in outdoor/indoor PM<sub>10</sub>/PM<sub>2.5</sub>/PM<sub>1.0</sub> in Beijing, China. *Environ. Pollut.* **2017**, 225, 674-680.
10. Li, H.; Li, J.; Li, H.; Yu, H.; Yang, L.; Chen, X.; Cai, Z., Seasonal variations and inhalation risk assessment of short-chain chlorinated paraffins in PM<sub>2.5</sub> of Jinan, China. *Environ. Pollut.* **2019**, 245, 325-330.
11. Wang, P.; Zhao, N.; Cui, Y.; Jiang, W.; Wang, L.; Wang, Z.; Chen, X.; Jiang, L.; Ding, L., Short-chain chlorinated paraffin (SCCP) pollution from a CP production plant in China: Dispersion, congener patterns and health risk assessment. *Chemosphere* **2018**, 211, 456-464.
12. Niu, S.; Chen, R.; Zou, Y.; Dong, L.; Hai, R.; Huang, Y., Spatial distribution and profile of atmospheric short-chain chlorinated paraffins in the Yangtze River Delta. *Environ. Pollut.* **2020**, 259, 113958.
13. Zhou, W.; Shen, M.; Lam, J. C. W.; Zhu, M.; Liu, L.; Chen, H.; Du, B.; Zeng, L.; Zeng, E. Y., Size-dependent distribution and inhalation exposure characteristics of particle-bound chlorinated paraffins in indoor air in Guangzhou, China. *Environ. Int.* **2018**, 121, 675-682.
14. Li, T.; Gao, S.; Ben, Y.; Zhang, H.; Kang, Q.; Wan, Y., Screening of Chlorinated Paraffins and Unsaturated Analogues in Commercial Mixtures: Confirmation of Their Occurrences in the Atmosphere. *Environ. Sci. Technol.* **2018**, 52, (4), 1862-1870.

15. Wang, Y.; Li, J.; Cheng, Z.; Li, Q.; Pan, X.; Zhang, R.; Liu, D.; Luo, C.; Liu, X.; Katsoyiannis, A.; Zhang, G., Short- and Medium-Chain Chlorinated Paraffins in Air and Soil of Subtropical Terrestrial Environment in the Pearl River Delta, South China: Distribution, Composition, Atmospheric Deposition Fluxes, and Environmental Fate. *Environ. Sci. Technol.* **2013**, 47, (6), 2679-2687.
16. Zhuo, M.; Ma, S.; Li, G.; Yu, Y.; An, T., Chlorinated paraffins in the indoor and outdoor atmospheric particles from the Pearl River Delta: Characteristics, sources, and human exposure risks. *Sci. Total Environ.* **2019**, 650, 1041-1049.
17. Wu, J.; Gao, W.; Liang, Y.; Fu, J.; Gao, Y.; Wang, Y.; Jiang, G., Spatiotemporal Distribution and Alpine Behavior of Short Chain Chlorinated Paraffins in Air at Shergyla Mountain and Lhasa on the Tibetan Plateau of China. *Environ. Sci. Technol.* **2017**, 51, (19), 11136-11144.
18. Ma, X.; Wang, Y.; Gao, W.; Wang, Y.; Wang, Z.; Yao, Z.; Jiang, G., Air-Seawater Gas Exchange and Dry Deposition of Chlorinated Paraffins in a Typical Inner Sea (Liaodong Bay), North China. *Environ. Sci. Technol.* **2018**, 52, (14), 7729-7735.
19. Wong, F.; Suzuki, G.; Michinaka, C.; Yuan, B.; Takigami, H.; de Wit, C. A., Dioxin-like activities, halogenated flame retardants, organophosphate esters and chlorinated paraffins in dust from Australia, the United Kingdom, Canada, Sweden and China. *Chemosphere* **2017**, 168, 1248-1256.
20. Zeng, Y.-H.; Tang, B.; Luo, X.-J.; Zheng, X.-B.; Peng, P.-A.; Mai, B.-X., Organohalogen pollutants in surface particulates from workshop floors of four major e-waste recycling sites in China and implications for emission lists. *Sci. Total Environ.* **2016**, 569, 982-989.
21. Liu, L.-H.; Ma, W.-L.; Liu, L.-Y.; Huo, C.-Y.; Li, W.-L.; Gao, C.-J.; Li, H.-L.; Li, Y.-F.; Chan, H. M., Occurrence, sources and human exposure assessment of SCCPs in indoor dust of northeast China. *Environ. Pollut.* **2017**, 225, 232-243.
22. Shi, L.; Gao, Y.; Zhang, H.; Geng, N.; Xu, J.; Zhan, F.; Ni, Y.; Hou, X.; Chen, J., Concentrations of short- and medium-chain chlorinated paraffins in indoor dusts from malls in China: Implications for human exposure. *Chemosphere* **2017**, 172, 103-110.
23. Cao, D.; Gao, W.; Wu, J.; Lv, K.; Xin, S.; Wang, Y.; Jiang, G., Occurrence and Human Exposure Assessment of Short- and Medium-Chain Chlorinated Paraffins in Dusts from Plastic Sports Courts and Synthetic Turf in Beijing, China. *Environ. Sci. Technol.* **2019**, 53, (1), 443-451.
24. Chen, H.; Lam, J. C. W.; Zhu, M.; Wang, F.; Zhou, W.; Du, B.; Zeng, L.; Zeng, E. Y., Combined Effects of Dust and Dietary Exposure of Occupational Workers and Local Residents to Short- and Medium-Chain Chlorinated Paraffins in a Mega E-Waste Recycling Industrial Park in South China. *Environ. Sci. Technol.* **2018**, 52, (20), 11510-11519.
25. Ma, X.; Zhang, H.; Wang, Z.; Yao, Z.; Chen, J.; Chen, J., Bioaccumulation and Trophic Transfer of Short Chain Chlorinated Paraffins in a Marine Food Web from Liaodong Bay, North China. *Environ. Sci. Technol.* **2014**, 48, (10), 5964-5971.
26. Yu, G., Study on method and application for analysis of short chain chlorinated paraffins in marine environment. *Dalian Maritime University, Dalian, Liaoning, China* **2012**, p. 74 (in Chinese).
27. Zeng, L.; Wang, T.; Wang, P.; Liu, Q.; Han, S.; Yuan, B.; Zhu, N.; Wang, Y.; Jiang, G., Distribution and Trophic Transfer of Short-Chain Chlorinated Paraffins in an Aquatic Ecosystem Receiving Effluents from a Sewage Treatment Plant. *Environ. Sci. Technol.* **2011**, 45,

- (13), 5529-5535.
28. Zeng, L.; Li, H.; Wang, T.; Gao, Y.; Xiao, K.; Du, Y.; Wang, Y.; Jiang, G., Behavior, Fate, and Mass Loading of Short Chain Chlorinated Paraffins in an Advanced Municipal Sewage Treatment Plant. *Environ. Sci. Technol.* **2013**, 47, (2), 732-740.
  29. Wan, W., Distribution characteristics of short-chain chlorinated paraffin in Baiyangdian Lake and the middle reaches of the Yangtze River. *Shijiazhuang: Hebei Normal University* **2017** 24-50 (in Chinese).
  30. Zhao, N.; Cui, Y.; Wang, P.; Li, S.; Jiang, W.; Luo, N.; Wang, Z.; Chen, X.; Ding, L., Short-chain chlorinated paraffins in soil, sediment, and seawater in the intertidal zone of Shandong Peninsula, China: Distribution and composition. *Chemosphere* **2019**, 220, 452-458.
  31. Wang, X.-T.; Jia, H.-H.; Hu, B.-P.; Cheng, H.-X.; Zhou, Y.; Fu, R., Occurrence, sources, partitioning and ecological risk of short- and medium-chain chlorinated paraffins in river water and sediments in Shanghai. *Sci. Total Environ.* **2019**, 653, 475-484.
  32. Huang, Y.; Chen, L.; Jiang, G.; He, Q.; Ren, L.; Gao, B.; Cai, L., Bioaccumulation and biomagnification of short-chain chlorinated paraffins in marine organisms from the Pearl River Estuary, South China. *Sci. Total Environ.* **2019**, 671, 262-269.
  33. Sun, R.; Luo, X.; Tang, B.; Chen, L.; Liu, Y.; Mai, B., Bioaccumulation of short chain chlorinated paraffins in a typical freshwater food web contaminated by e-waste in south china: Bioaccumulation factors, tissue distribution, and trophic transfer. *Environ. Pollut.* **2017**, 222, 165-174.
  34. Aamir, M.; Yin, S.; Zhou, Y.; Xu, C.; Liu, K.; Liu, W., Congener-specific C-10-C-13 and C-14-C-17 chlorinated paraffins in Chinese agricultural soils: Spatio-vertical distribution, homologue pattern and environmental behavior. *Environ. Pollut.* **2019**, 245, 789-798.
  35. Gao, Y.; Zhang, H.; Su, F.; Tian, Y.; Chen, J., Environmental Occurrence and Distribution of Short Chain Chlorinated Paraffins in Sediments and Soils from the Liaohe River Basin, P. R. China. *Environ. Sci. Technol.* **2012**, 46, (7), 3771-3778.
  36. Xu, J.; Gao, Y.; Zhang, H.; Zhan, F.; Chen, J., Dispersion of Short- and Medium-Chain Chlorinated Paraffins (CPs) from a CP Production Plant to the Surrounding Surface Soils and Coniferous Leaves. *Environ. Sci. Technol.* **2016**, 50, (23), 12759-12766.
  37. Zeng, L.; Wang, T.; Han, W.; Yuan, B.; Liu, Q.; Wang, Y.; Jiang, G., Spatial and Vertical Distribution of Short Chain Chlorinated Paraffins in Soils from Wastewater Irrigated Farmlands. *Environ. Sci. Technol.* **2011**, 45, (6), 2100-2106.
  38. Huang, D.; Gao, L.; Qiao, L.; Cui, L.; Xu, C.; Wang, K.; Zheng, M., Concentrations of and risks posed by short-chain and medium-chain chlorinated paraffins in soil at a chemical industrial park on the southeast coast of China. *Environ. Pollut.* **2020**, 258, 113704.
  39. Wang, X.-T.; Zhang, Y.; Miao, Y.; Ma, L.-L.; Li, Y.-C.; Chang, Y.-Y.; Wu, M.-H., Short-chain chlorinated paraffins (SCCPs) in surface soil from a background area in China: occurrence, distribution, and congener profiles. *Environ. Sci. Pollut. Res.* **2013**, 20, (7), 4742-4749.
  40. Wang, X.-T.; Wang, X.-K.; Zhang, Y.; Chen, L.; Sun, Y.-F.; Li, M.; Wu, M.-H., Short- and medium-chain chlorinated paraffins in urban soils of Shanghai: Spatial distribution, homologue group patterns and ecological risk assessment. *Sci. Total Environ.* **2014**, 490, 144-152.
  41. Wang, X.-T.; Xu, S.-Y.; Wang, X.-K.; Hu, B.-P.; Jia, H.-H., Occurrence, homologue patterns and source apportionment of short- and medium-chain chlorinated paraffins in suburban soils of Shanghai, China. *Chemosphere* **2017**, 180, 302-311.

42. Yuan, B.; Fu, J.; Wang, Y.; Jiang, G., Short-chain chlorinated paraffins in soil, paddy seeds (*Oryza sativa*) and snails (*Ampullariidae*) in an e-waste dismantling area in China: Homologue group pattern, spatial distribution and risk assessment. *Environ. Pollut.* **2017**, *220*, 608-615.
43. Xia, Q., The research about SCCPs level in the Zhejiang Province soil and sediments. *Zhejiang University of Technology, Hangzhou, China* **2012**, p. 71 (in Chinese).
44. Chen, R.; Wang, Y.; Wang, P.; Jiang, G., Spatial distribution of short chain chlorinated paraffins in soils from Taizhou, an e-waste dismantling area. *Environmental Chemistry* **2014**, *33*, (6), 873-879 (in Chinese).
45. Xu, C.; Zhang, Q.; Gao, L.; Zheng, M.; Qiao, L.; Cui, L.; Wang, R.; Cheng, J., Spatial distributions and transport implications of short- and medium-chain chlorinated paraffins in soils and sediments from an e-waste dismantling area in China. *Sci. Total Environ.* **2019**, *649*, 821-828.
46. Han, S.; Huang, Y.; Chen, L.; Ye, Z.; Feng, Y.; Zhang, S., The short-chain chlorinated paraffins content and distribution in soil of Guangzhou. *Sichuan Environment* **2012**, *31*, (4), 56-60 (in Chinese).
47. Huang, Y.; Chen, L.; Feng, Y.; Ye, Z.; He, Q.; Feng, Q.; Qing, X.; Liu, M.; Gao, B., Short-chain chlorinated paraffins in the soils of two different Chinese cities: Occurrence, homologue patterns and vertical migration. *Sci. Total Environ.* **2016**, *557*, 644-651.
48. Wu, Y.; Wu, J.; Tan, H.; Song, Q.; Zhang, J.; Zhong, X.; Zhou, J.; Wu, W.; Cai, X.; Zhang, W.; Liu, X., Distributions of chlorinated paraffins and the effects on soil microbial community structure in a production plant brownfield site. *Environ. Pollut.* **2020**, *262*, 114328.
49. Feng, Y.; Chen, L.; Huang, Y.; Ye, Z.; Jiang, G.; Wang, X., Preliminary study on short-chain chlorinated paraffins in different types of soils of Chengdu. *Environ. Sci. Technol.* **2014**, *37*, (1), 33-37 (in Chinese).
50. Wang, K.; Gao, L.; Zhu, S.; Cui, L.; Qiao, L.; Xu, C.; Huang, D.; Zheng, M., Spatial distributions and homolog profiles of chlorinated nonane paraffins, and short and medium chain chlorinated paraffins in soils from Yunnan, China. *Chemosphere* **2020**, *247*, 125855.
51. Li, H.; Bu, D.; Fu, J.; Gao, Y.; Cong, Z.; Zhang, G.; Wang, Y.; Chen, X.; Zhang, A.; Jiang, G., Trophic Dilution of Short-Chain Chlorinated Paraffins in a Plant-Plateau Pika-Eagle Food Chain from the Tibetan Plateau. *Environ. Sci. Technol.* **2019**, *53*, (16), 9472-9480.
52. Wu, J.; Gao, W.; Liang, Y.; Fu, J.; Shi, J.; Lu, Y.; Wang, Y.; Jiang, G., Short- and medium-chain chlorinated paraffins in multi-environmental matrices in the Tibetan Plateau environment of China: A regional scale study. *Environ. Int.* **2020**, *140*, 105767.
53. Zhang, C.; Chang, H.; Wang, H.; Zhu, Y.; Zhao, X.; He, Y.; Sun, F.; Wu, F., Spatial and Temporal Distributions of Short-, Medium-, and Long-Chain Chlorinated Paraffins in Sediment Cores from Nine Lakes in China. *Environ. Sci. Technol.* **2019**, *53*, (16), 9462-9471.
54. Gao, Y.; Wang, C.; Zhang, H.-j.; Zou, L.-l.; Tian, Y.-z.; Chen, J.-p., Analysis of short-chain chlorinated paraffins in sediment samples from the mouth of the Daliao River by HRGC/ECNI-LRMS. *Environmental Science* **2010**, *31*, (8), 1904-1908 (in Chinese).
55. Chen, C.; Ma, X.; Guo, W.; Zhao, Y.; Jingcai, L. U.; Wang, Z.; Yao, Z., Congener specific distribution and bioaccumulation of short-chain chlorinated paraffins in Liao estuary. *Chin. Sci. Bull.* **2014**, *59*, (7), 578-585 (in Chinese).
56. Pan, X.; Tang, J.; Tian, C.; Li, J.; Zhang, G., Short- and medium-chain chlorinated paraffins in sediments from the Laizhou Bay area, North China: Implications for transportation from rivers

- to marine environment. *Environ. Pollut.* **2018**, 243, 1460-1468.
57. Qiao, L.; Xia, D.; Gao, L.; Huang, H.; Zheng, M., Occurrences, sources and risk assessment of short- and medium-chain chlorinated paraffins in sediments from the middle reaches of the Yellow River, China. *Environ. Pollut.* **2016**, 219, 483-489.
  58. Li, Q.; Cheng, X.; Cui, Y.; Sun, J.; Li, J.; Zhang, G., Short- and medium-chain chlorinated paraffins in the Henan section of the Yellow River: Occurrences, fates, and fluxes. *Sci. Total Environ.* **2018**, 640, 1312-1319.
  59. Qiao, L.; Gao, L.; Xia, D.; Huang, H.; Zheng, M., Short- and medium-chain chlorinated paraffins in sediments from the middle reaches of the Yangtze River: Spatial distributions, source apportionment and risk assessment. *Sci. Total Environ.* **2017**, 575, 1177-1182.
  60. Chen, M.-Y.; Luo, X.-J.; Zhang, X.-L.; He, M.-J.; Chen, S.-J.; Mi, B.-X., Chlorinated Paraffins in Sediments from the Pearl River Delta, South China: Spatial and Temporal Distributions and Implication for Processes. *Environ. Sci. Technol.* **2011**, 45, (23), 9936-9943.
  61. Chen, M.; Lu, F.; Chen, J.; Luo, X.; Mai, B., Temporal distributions of chlorinated paraffins in sediments core from the pearl river delta. *Environmental Chemistry* **2014**, 33, (5), 832-836 (in Chinese).
  62. Zeng, L.; Lam, J. C. W.; Horii, Y.; Li, X.; Chen, W.; Qiu, J.-W.; Leung, K. M. Y.; Yamazaki, E.; Yamashita, N.; Lam, P. K. S., Spatial and temporal trends of short- and medium-chain chlorinated paraffins in sediments off the urbanized coastal zones in China and Japan: A comparison study. *Environ. Pollut.* **2017**, 224, 357-367.
  63. Lu, F.; Chen, M.; Chen, Y.; Liu, F.; Luo, X.; Mai, B., Distribution of chlorinated paraffins and polychlorinated biphenyls in e-waste, residues and sediment from e-waste areas of Qingyuan. *Environmental Chemistry* **2015**, 34, (7), 1297-1303 (in Chinese).
  64. Ma, X.; Chen, C.; Zhang, H.; Gao, Y.; Wang, Z.; Yao, Z.; Chen, J.; Chen, J., Congener-specific distribution and bioaccumulation of short-chain chlorinated paraffins in sediments and bivalves of the Bohai Sea, China. *Mar. Pollut. Bull.* **2014**, 79, (1-2), 299-304.
  65. Zeng, L.; Chen, R.; Zhao, Z.; Wang, T.; Gao, Y.; Li, A.; Wang, Y.; Jiang, G.; Sun, L., Spatial Distributions and Deposition Chronology of Short Chain Chlorinated Paraffins in Marine Sediments across the Chinese Bohai and Yellow Seas. *Environ. Sci. Technol.* **2013**, 47, (20), 11449-11456.
  66. Zhao, Z.; Li, H.; Wang, Y.; Li, G.; Cao, Y.; Zeng, L.; Lan, J.; Wang, T.; Jiang, G., Source and Migration of Short-Chain Chlorinated Paraffins in the Coastal East China Sea Using Multiproxies of Marine Organic Geochemistry. *Environ. Sci. Technol.* **2013**, 47, (10), 5013-5022.
  67. Zeng, L.; Zhao, Z.; Li, H.; Thanh, W.; Liu, Q.; Xiao, K.; Du, Y.; Wang, Y.; Jiang, G., Distribution of Short Chain Chlorinated Paraffins in Marine Sediments of the East China Sea: Influencing Factors, Transport and Implications. *Environ. Sci. Technol.* **2012**, 46, (18), 9898-9906.
  68. Li, H.; Lan, J.; Zeng, L.; Cao, Y.; Zhao, Z., Sedimentary records of short chain chlorinated paraffins in the Zhejiang-Fujian mud area of the East China Sea. *Fresenius Environ. Bull.* **2014**, 23, (1), 105-112.
  69. Wang, C.; Gao, Y.; Zhang, H.; Fan, J.; Chen, J., Bioaccumulation characteristics of short-chain chlorinated paraffins in Liaodong Bay, Northeast China. *Environmental Chemistry* **2011**, 30, (1), 44-49 (in Chinese).

70. Huang, H.; Gao, L.; Xia, D.; Qiao, L., Bioaccumulation and biomagnification of short and medium chain polychlorinated paraffins in different species of fish from Liaodong Bay, North China. *Scientific Reports* **2017**, 7, (1), 1-9.
71. Wang, T.; Yu, J.; Han, S.; Wang, Y.; Jiang, G., Levels of short chain chlorinated paraffins in pine needles and bark and their vegetation-air partitioning in urban areas. *Environ. Pollut.* **2015**, 196, 309-312.
72. Du, X.; Yuan, B.; Zhou, Y.; de Wit, C. A.; Zheng, Z.; Yin, G., Chlorinated Paraffins in Two Snake Species from the Yangtze River Delta: Tissue Distribution and Biomagnification. *Environ. Sci. Technol.* **2020**, 54, (5), 2753-2762.
73. Du, X.; Yuan, B.; Zhou, Y.; Benskin, J. P.; Qiu, Y.; Yin, G.; Zhao, J., Short-, Medium-, and Long-Chain Chlorinated Paraffins in Wildlife from Paddy Fields in the Yangtze River Delta. *Environ. Sci. Technol.* **2018**, 52, (3), 1072-1080.
74. Zhou, Y.; Yin, G.; Du, X.; Xu, M.; Qiu, Y.; Ahlqvist, P.; Chen, Q.; Zhao, J., Short-chain chlorinated paraffins (SCCPs) in a freshwater food web from Dianshan Lake: Occurrence level, congener pattern and trophic transfer. *Sci. Total Environ.* **2018**, 615, 1010-1018.
75. Wang, X.-T.; Zhou, J.; Lei, B.-L.; Zhou, J.-M.; Xu, S.-Y.; Hu, B.-P.; Wang, D.-Q.; Zhang, D.-P.; Wu, M.-H., Atmospheric occurrence, homologue patterns and source apportionment of short- and medium-chain chlorinated paraffins in Shanghai, China: Biomonitoring with Masson pine (*Pinus massoniana* L.) needles. *Sci. Total Environ.* **2016**, 560, 92-100.
76. Jiang, G., The contamination characteristic of short-chain chlorinated paraffins in edible fish and preliminary study on their risk exposure. *Taiyuan University of Science and Technology, Taiyuan, Shanxi, China* **2013**, p. 59 (in Chinese).
77. Sun, R.; Luo, X.; Tang, B.; Li, Z.; Huang, L.; Wang, T.; Mai, B., Short-chain chlorinated paraffins in marine organisms from the Pearl River Estuary in South China: Residue levels and interspecies differences. *Sci. Total Environ.* **2016**, 553, 196-203.
78. Zeng, L.; Lam, J. C. W.; Chen, H.; Du, B.; Leung, K. M. Y.; Lam, P. K. S., Tracking Dietary Sources of Short- and Medium-Chain Chlorinated Paraffins in Marine Mammals through a Subtropical Marine Food Web. *Environ. Sci. Technol.* **2017**, 51, (17), 9543-9552.
79. Luo, X.-J.; Sun, Y.-X.; Wu, J.-P.; Chen, S.-J.; Mai, B.-X., Short-chain chlorinated paraffins in terrestrial bird species inhabiting an e-waste recycling site in South China. *Environ. Pollut.* **2015**, 198, 41-46.
80. Guan, K.-L.; Liu, Y.; Luo, X.-J.; Zeng, Y.-H.; Mai, B.-X., Short- and medium-chain chlorinated paraffins in aquatic organisms from an e-waste site: Biomagnification and maternal transfer. *Sci. Total Environ.* **2020**, 708, 134840.
81. Ren, Z.; Zeng, Y.; Tang, B.; Luo, X.; Huang, C.; Mai, B., Bioaccumulative Characteristics of Halogenated Flame Retardants in Aquatic and Terrestrial Biotas: A Case Study of Catfish and Pigeons. *Asian Journal of Ecotoxicology* **2018**, 13, (1), 163-168 (in Chinese).
82. Yuan, B.; Thanh, W.; Zhu, N.; Zhang, K.; Zeng, L.; Fu, J.; Wang, Y.; Jiang, G., Short Chain Chlorinated Paraffins in Mollusks from Coastal Waters in the Chinese Bohai Sea. *Environ. Sci. Technol.* **2012**, 46, (12), 6489-6496.
83. Zeng, L.; Lam, J. C. W.; Wang, Y.; Jiang, G.; Lam, P. K. S., Temporal Trends and Pattern Changes of Short- and Medium-Chain Chlorinated Paraffins in Marine Mammals from the South China Sea over the Past Decade. *Environ. Sci. Technol.* **2015**, 49, (19), 11348-11355.
84. Jiang, W.; Chen, H.; Huang, T.; Lian, L.; Li, J.; Jia, C.; Gao, H.; Mao, X.; Ma, J., Tagged



- sources of short-chain chlorinated paraffins in China's marine environment and fish. *Chemosphere* **2019**, 229, 358-365.
85. Du, B.; Ge, J.; Yang, R.; Han, X.; Chen, H.; Li, J.; Zeng, L., Altitude-dependent accumulation of short chain chlorinated paraffins in fish from alpine lakes and Lhasa river on the Tibetan Plateau. *Environ. Pollut.* **2019**, 250, 594-600.
  86. Chen, L.; Huang, Y.; Han, S.; Feng, Y.; Jiang, G.; Tang, C.; Ye, Z.; Zhan, W.; Liu, M.; Zhang, S., Sample pretreatment optimization for the analysis of short chain chlorinated paraffins in soil with gas chromatography-electron capture negative ion-mass spectrometry. *J. Chromatogr. A* **2013**, 1274, 36-43.
  87. Harada, K. H.; Takasuga, T.; Hitomi, T.; Wang, P.; Matsukami, H.; Koizumi, A., Dietary Exposure to Short-Chain Chlorinated Paraffins Has Increased in Beijing, China. *Environ. Sci. Technol.* **2011**, 45, (16), 7019-7027.
  88. Cui, L.; Gao, L.; Zheng, M.; Li, J.; Zhang, L.; Wu, Y.; Qiao, L.; Xu, C.; Wang, K.; Huang, D., Bioaccessibility of short chain chlorinated paraffins in meat and seafood. *Sci. Total Environ.* **2019**, 668, 996-1003.
  89. Gao, W.; Cao, D.; Lv, K.; Wu, J.; Wang, Y.; Wang, C.; Wang, Y.; Jiang, G., Elimination of short-chain chlorinated paraffins in diet after Chinese traditional cooking-a cooking case study. *Environ. Int.* **2019**, 122, 340-345.
  90. Jiang, G.; Chen, L.-g.; He, Q.-s.; Meng, X.-z.; Feng, Y.-b.; Huang, Y.-m.; Tang, C.-m., Contamination characteristics of short-chain chlorinated paraffins in edible fish of Shanghai. *Environmental Science* **2013**, 34, (9), 3374-3380 (in Chinese).
  91. Yu, J.; Wang, T.; Wang, Y.; Meng, M.; Chen, R.; Jiang, G., Levels and Distribution of Short Chain Chlorinated Paraffins in Seafood from Dalian, China. *Environmental Science* **2014**, 35, (5), 1955-1961 (in Chinese).
  92. Li, H.; Gao, S.; Yang, M.; Zhang, F.; Cao, L.; Xie, H.; Chen, X.; Cai, Z., Dietary exposure and risk assessment of short-chain chlorinated paraffins in supermarket fresh products in Jinan, China. *Chemosphere* **2020**, 244, 125393.
  93. Cao, Y.; Harada, K. H.; Liu, W.; Yan, J.; Zhao, C.; Niisoe, T.; Adachi, A.; Fujii, Y.; Nouda, C.; Takasuga, T.; Koizumi, A., Short-chain chlorinated paraffins in cooking oil and related products from China. *Chemosphere* **2015**, 138, 104-111.
  94. Huang, H.; Gao, L.; Zheng, M.; Li, J.; Zhang, L.; Wu, Y.; Wang, R.; Xia, D.; Qiao, L.; Cui, L.; Su, G.; Liu, W.; Liu, G., Dietary exposure to short- and medium-chain chlorinated paraffins in meat and meat products from 20 provinces of China. *Environ. Pollut.* **2018**, 233, 439-445.
  95. Wang, R.; Gao, L.; Zheng, M.; Tian, Y.; Li, J.; Zhang, L.; Wu, Y.; Huang, H.; Qiao, L.; Liu, W.; Su, G.; Liu, G.; Liu, Y., Short- and medium-chain chlorinated paraffins in aquatic foods from 18 Chinese provinces: Occurrence, spatial distributions, and risk assessment. *Sci. Total Environ.* **2018**, 615, 1199-1206.
  96. Wang, R.; Gao, L.; Zheng, M.; Li, J.; Zhang, L.; Wu, Y.; Wang, G.; Xiong, L.; Ding, D.; Lu, D.; Qiao, L.; Cui, L.; Xu, C., Characterization of short- and medium-chain chlorinated paraffins in cereals and legumes from 19 Chinese provinces. *Chemosphere* **2019**, 226, 282-289.
  97. Chen, H.; Shen, J.; Wang, X.; Yang, L., Dietary Pollution Status and Exposure Risk Assessment of Short-Chain Chlorinated Paraffins. *Food Science* **2019**, 40, (21), 143-149 (in Chinese).
  98. Dong, S.; Zhang, S.; Li, X.; Wei, S.; Li, T.; Zou, Y.; Zhang, W.; Cheng, J.; Wang, R.; Wang, P.; Su, X., Occurrence of short- and medium-chain chlorinated paraffins in raw dairy cow milk

- from five Chinese provinces. *Environ. Int.* **2020**, 136, 105466.
99. Huang, Y.; Qing, X.; Jiang, G.; Chen, L.; He, Q.; Meng, X.-Z.; Gao, B., Short-chain chlorinated paraffins in fish from two developed regions of China: Occurrence, influencing factors and implication for human exposure via consumption. *Chemosphere* **2019**, 236.
  100. Dong, S.; Li, X.; Su, X.; Wang, P., Concentrations and congener group profiles of short-and medium-chain chlorinated paraffins in animal feed materials. *Sci. Total Environ.* **2019**, 647, 676-681.
  101. Zeng, Y.-H.; Luo, X.-J.; Tang, B.; Mai, B.-X., Habitat- and species-dependent accumulation of organohalogen pollutants in home-produced eggs from an electronic waste recycling site in South China: Levels, profiles, and human dietary exposure. *Environ. Pollut.* **2016**, 216, 64-70.
  102. Zeng, Y.; Huang, C.; Luo, X.; Liu, Y.; Ren, Z.; Mai, B., Polychlorinated biphenyls and chlorinated paraffins in home-produced eggs from an e-waste polluted area in South China: Occurrence and human dietary exposure. *Environ. Int.* **2018**, 116, 52-59.
  103. Sun, R.; Chen, J.; Shao, H.; Tang, L.; Zheng, X.; Li, Q. X.; Wang, Y.; Luo, X.; Mai, B., Bioaccumulation of short-chain chlorinated paraffins in chicken (*Gallus domesticus*): Comparison to fish. *J. Hazard. Mater.* **2020**, 396, 122590.
  104. Chen, R., Environmental behavior of short-chain chlorinated paraffins in multi-medium. *Shandong University, Jinan, Shandong, China* **2014**, p. 72 (in Chinese).
  105. Cao, Y.; Harada, K. H.; Hitomi, T.; Niisoe, T.; Wang, P.; Shi, Y.; Yang, H.-R.; Takasuga, T.; Koizumi, A., Lactational exposure to short-chain chlorinated paraffins in China; Korea, and Japan. *Chemosphere* **2017**, 173, 43-48.
  106. Yang, L.; Wang, Z.; Li, J.; Ma, Y.; Kong, L.; Yang, H.; Wang, L.; Liu, Y.; Lu, Y.; Zhang, J., Evaluation of short chain chlorinated paraffins in human milk and their intake by infants in Hebei Province, China. *Food Additives and Contaminants Part a-Chemistry Analysis Control Exposure & Risk Assessment* **2018**, 35, (10), 2011-2021.
  107. Xia, D.; Gao, L.-R.; Zheng, M.-H.; Li, J.-G.; Zhang, L.; Wu, Y.-N.; Qiao, L.; Tian, Q.-C.; Huang, H.-T.; Liu, W.-B.; Su, G.-J.; Liu, G.-R., Health risks posed to infants in rural China by exposure to short- and medium-chain chlorinated paraffins in breast milk. *Environ. Int.* **2017**, 103, 1-7.
  108. Li, T.; Wan, Y.; Gao, S.; Wang, B.; Hu, J., High-Throughput Determination and Characterization of Short-, Medium-, and Long-Chain Chlorinated Paraffins in Human Blood. *Environ. Sci. Technol.* **2017**, 51, (6), 3346-3354.
  109. Xia, D.; Gao, L.; Zheng, M.; Li, J.; Zhang, L.; Wu, Y.; Tian, Q.; Huang, H.; Qiao, L., Human Exposure to Short- and Medium-Chain Chlorinated Paraffins via Mothers' Milk in Chinese Urban Population. *Environ. Sci. Technol.* **2017**, 51, (1), 608-615.
  110. Wang, Y.; Gao, W.; Wang, Y.; Jiang, G., Distribution and Pattern Profiles of Chlorinated Paraffins in Human Placenta of Henan Province, China. *Environmental Science & Technology Letters* **2018**, 5, (1), 9-13.
  111. Qiao, L.; Gao, L.; Zheng, M.; Xia, D.; Li, J.; Zhang, L.; Wu, Y.; Wang, R.; Cui, L.; Xu, C., Mass Fractions, Congener Group Patterns, and Placental Transfer of Short- and Medium-Chain Chlorinated Paraffins in Paired Maternal and Cord Serum. *Environ. Sci. Technol.* **2018**, 52, (17), 10097-10103.
  112. Aamir, M.; Yin, S.; Guo, F.; Liu, K.; Xu, C.; Liu, W., Congener-Specific Mother-Fetus Distribution, Placental Retention, and Transport of C10-13 and C14-17 Chlorinated Paraffins in

- Pregnant Women. *Environ. Sci. Technol.* **2019**, 53, (19), 11458-11466.
113. Zhou, X.; Wu, H.; Huang, X.; Hang, F.; Luo, H., Development a simple and rapid HPLC-ESI-Q-TOF/MS method for determination of short- and medium-chain chlorinated paraffins in human serum. *Journal of Chromatography B-Analytical Technologies in the Biomedical and Life Sciences* **2019**, 1126, 121722.
  114. Xu, J.; Guo, W.; Wei, L.; Gao, Y.; Zhang, H.; Zhang, Y.; Sun, M.; Chen, J., Validation of a HRGC-ECNI/LRMS method to monitor short-chain chlorinated paraffins in human plasma. *Journal of Environmental Sciences* **2019**, 75, 289-295.
  115. Zhou, Y.; Yuan, B.; Nyberg, E.; Yin, G.; Bignert, A.; Glynn, A.; Odland, J. O.; Qu, Y.; Sun, Y.; Wu, Y.; Xiao, Q.; Yin, D.; Zhu, Z.; Zhao, J.; Bergman, A., Chlorinated Paraffins in Human Milk from Urban Sites in China, Sweden, and Norway. *Environ. Sci. Technol.* **2020**, 54, (7), 4356-4366.
  116. Liu, Y.; Aamir, M.; Li, M.; Liu, K.; Hu, Y.; Liu, N.; Xu, Y.; Du, J.; Xu, J.; Liu, W., Prenatal and postnatal exposure risk assessment of chlorinated paraffins in mothers and neonates: Occurrence, congener profile, and transfer behavior. *J. Hazard. Mater.* **2020**, 395, 122660.
  117. Ding, L.; Luo, N.; Liu, Y.; Fang, X.; Zhang, S.; Li, S.; Jiang, W.; Zhao, N., Short and medium-chain chlorinated paraffins in serum from residents aged from 50 to 84 in Jinan, China: Occurrence, composition and association with hematologic parameters. *Sci. Total Environ.* **2020**, 728, 137998.
  118. Zeng, L.; Wang, T.; Ruan, T.; Liu, Q.; Wang, Y.; Jiang, G., Levels and distribution patterns of short chain chlorinated paraffins in sewage sludge of wastewater treatment plants in China. *Environ. Pollut.* **2012**, 160, 88-94.
